# Supplementary material
Source: ML conference proceedings conference paper supplement (https://proceedings.mlr.press/v89/poon19a.html)
Supplement: Supplementary file [file poon19a-supp.pdf]

## A Notations.

In this section, we recall and introduce some notation which will be used throughout the appendix.

**Block norms.** By default,  $\|\cdot\|$  is the Euclidean norm for vector and spectral norm for matrices. For a vector  $x = [x_1, \dots, x_s] \in \mathbb{C}^{sd}$  formed of  $s$  blocks  $x_i \in \mathbb{C}^d$ ,  $1 \leq i \leq s$ , we define the block norm

$$\|x\|_{\text{block}} \stackrel{\text{def.}}{=} \sup_{1 \leq i \leq s} \|x_i\|_2$$

For a vector  $q = [q_1, \dots, q_s, Q_1, \dots, Q_s] \in \mathbb{C}^{s(d+1)}$  decomposed such that  $q_i \in \mathbb{C}$  and  $Q_i \in \mathbb{C}^d$ , we define

$$\|q\|_{\text{Block}} \stackrel{\text{def.}}{=} \max_{i=1}^s \{|q_i|, \|Q_i\|\}.$$

**Kernel** The empirical kernel is defined as

$$\hat{K}(x, x') = \frac{1}{m} \sum_{k=1}^m \overline{\varphi_{\omega_k}(x)} \varphi_{\omega_k}(x')$$

and the limit kernel is  $K(x, x) \stackrel{\text{def.}}{=} \mathbb{E}_{\omega} [\overline{\varphi_{\omega}(x)} \varphi_{\omega}(x')]$ . The metric tensor associated to this kernel is

$$\mathbf{H}_x \stackrel{\text{def.}}{=} \mathbb{E}_{\omega} [\overline{\nabla \varphi_{\omega}(x)} \nabla \varphi_{\omega}(x)^{\top}]$$

Given an event  $E$ , we write  $K_E(x, x') \stackrel{\text{def.}}{=} \mathbb{E}_{\omega} [\hat{K}(x, x') | E]$  to denote the conditional expectation on  $E$ .

**Derivatives** Given  $f \in \mathcal{C}^{\infty}(\mathcal{X})$ , by interpreting the  $r^{\text{th}}$  derivative as a multilinear map:  $\nabla^r f : (\mathbb{C}^d)^r \rightarrow \mathbb{C}$ , so given  $Q \stackrel{\text{def.}}{=} \{q_{\ell}\}_{\ell=1}^r \in (\mathbb{C}^d)^r$ ,

$$\nabla^r f[Q] = \sum_{i_1, \dots, i_r} \partial_{i_1} \cdots \partial_{i_r} f(x) q_{1, i_1} \cdots q_{r, i_r}.$$

and we define the  $r^{\text{th}}$  normalized derivative of  $f$  as

$$\mathbf{D}_r[f](x)[Q] \stackrel{\text{def.}}{=} \nabla^r f(x) [\{\mathbf{H}_x^{-\frac{1}{2}} q_i\}_{i=1}^r]$$

with norm  $\|\mathbf{D}_r[f](x)\| \stackrel{\text{def.}}{=} \sup_{\forall \ell, \|q_{\ell}\| \leq 1} |\mathbf{D}_r[f](x)[Q]|$ . We will sometimes make use the the multiarray interpretation:  $\mathbf{D}_0[f] = f$ ,  $\mathbf{D}_1[f](x) = \mathbf{H}_x^{-\frac{1}{2}} \nabla f(x) \in \mathbb{C}^d$ ,  $\mathbf{D}_2[f](x) = \mathbf{H}_x^{-\frac{1}{2}} \nabla^2 f(x) \mathbf{H}_x^{-\frac{1}{2}} \in \mathbb{C}^{d \times d}$ .

For a bivariate function  $K : \mathcal{X} \times \mathcal{X} \rightarrow \mathbb{C}$ ,  $\partial_{1,i}$  (resp.  $\partial_{2,i}$ ) designates the derivative with respect to the  $i^{\text{th}}$  coordinate of the first variable (resp. second variable), and similarly  $\nabla_i$  and  $\nabla_i^2$  denote the gradient and Hessian on the  $i^{\text{th}}$  coordinate respectively.

For  $i, j \in \{0, 1, 2\}$ , let  $K^{(ij)}(x, x')$  be a ‘‘bi’’-multilinear map, defined for  $Q \in (\mathbb{C}^d)^i$  and  $V \in (\mathbb{C}^d)^j$  as

$$[Q]K^{(ij)}(x, x')[V] \stackrel{\text{def.}}{=} \mathbb{E}[\overline{\mathbf{D}_i[\varphi_{\omega}](x)[Q]} \mathbf{D}_j[\varphi_{\omega}](x')[V]]$$

and  $\|K^{(ij)}(x, x')\| \stackrel{\text{def.}}{=} \sup_{Q, V} \|[Q]K^{(ij)}(x, x')[V]\|$  where the supremum is defined over all  $Q \stackrel{\text{def.}}{=} \{q_{\ell}\}_{\ell=1}^i$ ,  $V \stackrel{\text{def.}}{=} \{v_{\ell}\}_{\ell=1}^j$  with  $\|q_{\ell}\| \leq 1$ ,  $\|v_{\ell}\| \leq 1$ .

When  $i + j \leq 2$ , an equivalent definition is  $K^{(ij)}(x, x') = \mathbb{E}[\overline{\mathbf{D}_i[\varphi_{\omega}](x)[Q]} \mathbf{D}_j[\varphi_{\omega}](x')[V]]$ , and we note that  $K^{(00)} = K$ , and we have normalized so that  $\text{Re}(K^{(11)}(x, x)) = -\text{Re}(K^{(02)}(x, x))$ . Finally, we will make use of the still equivalent definition:  $[q]K^{(12)}(x, x') = \mathbb{E}[\overline{q^{\top} \mathbf{D}_1[\varphi_{\omega}](x)} \mathbf{D}_2[\varphi_{\omega}](x')^{\top}] \in \mathbb{C}^{d \times d}$ .

**Kernel constants** For for  $i, j \in \{(0, 0), (0, 1)\}$ , define  $B_{ij} \stackrel{\text{def}}{=} \sup_{x, x' \in \mathcal{X}} |K^{(ij)}(x, x')|$ , for  $(i, j) \in \{(0, 2), (1, 2)\}$ ,

$$B_{ij} \stackrel{\text{def}}{=} \sup \left\{ \left\| K^{(ij)}(x, x') \right\| ; d_{\mathbf{H}}(x, x') \leq r_{\text{near}} \text{ or } d_{\mathbf{H}}(x, x') > \Delta/2 \right\}.$$

and define for  $i = 1, 2$

$$B_{ii} \stackrel{\text{def}}{=} \sup_{x \in \mathcal{X}} \left\| K^{(ii)}(x, x) \right\|.$$

For convenience, we define

$$B_i \stackrel{\text{def}}{=} B_{0i} + B_{1i} + 1, \quad B \stackrel{\text{def}}{=} \sum_{\substack{i, j \in \{0, 1, 2\} \\ i+j \leq 3}} B_{ij} + 1. \quad (\text{A.1})$$

**Matrices and vectors** We will make use of the following vectors and matrices throughout: Given  $X \stackrel{\text{def}}{=} \{x_j\}_{j=1}^s \in \mathcal{X}^s$  and  $a \in \mathbb{C}^s$  which are always clear from context, define the vector  $\gamma_X(\omega) \in \mathbb{C}^{s(d+1)}$  as

$$\gamma_X(\omega) \stackrel{\text{def}}{=} \left( \left( \overline{\varphi_\omega(x_i)} \right)_{i=1}^s, \left( \overline{\mathbf{D}_1[\varphi_\omega](x_i)}^\top \right)_{i=1}^s \right)^\top, \quad (\text{A.2})$$

and

$$\begin{aligned} \Upsilon_X &\stackrel{\text{def}}{=} \mathbb{E}_\omega [\gamma(\omega) \gamma(\omega)^*] \in \mathbb{C}^{s(d+1) \times s(d+1)} \\ \mathbf{f}_X(x) &\stackrel{\text{def}}{=} \mathbb{E}_\omega [\gamma(\omega) \varphi_\omega(x)] \in \mathbb{C}^{s(d+1)} \\ \alpha &\stackrel{\text{def}}{=} \Upsilon_X^{-1} \mathbf{u}_s, \quad \mathbf{u}_s = \begin{pmatrix} \text{sign}(a) \\ 0_{sd} \end{pmatrix}. \end{aligned}$$

Note that the diagonal of  $\Upsilon$  has only 1's. For  $\omega_1, \dots, \omega_m$ , we denote their empirical versions as:

$$\begin{aligned} \hat{\Upsilon}_X &\stackrel{\text{def}}{=} \frac{1}{m} \sum_{k=1}^m \gamma(\omega_k) \gamma(\omega_k)^*, \\ \hat{\mathbf{f}}_X(x) &\stackrel{\text{def}}{=} \frac{1}{m} \sum_{k=1}^m \gamma(\omega_k) \varphi_{\omega_k}(x), \quad \hat{\alpha} \stackrel{\text{def}}{=} \hat{\Upsilon}_X^{-1} \mathbf{u}_s. \end{aligned}$$

which will serve us to construct our certificate, using the properties of their respective limit version.

We remark that  $\mathbf{G}_X^{-1/2} \Gamma_X^* \Gamma_X \mathbf{G}_X^{-1/2} = \hat{\Upsilon}_X$ , where  $\Gamma_X$  is defined in the main paper and

$$\mathbf{G}_X = \begin{pmatrix} \text{Id}_s & & & 0 \\ & \mathbf{H}_{x_1} & & \\ & & \ddots & \\ 0 & & & \mathbf{H}_{x_s} \end{pmatrix} \quad (\text{A.3})$$

The vanishing derivative pre-certificate  $\hat{\eta}_{X,a}$  is  $\hat{\alpha}^\top \hat{\mathbf{f}}_X(\cdot)$  and the limit pre-certificate is  $\eta_{X,a} \stackrel{\text{def}}{=} \alpha^\top \mathbf{f}_X(\cdot)$ . When the set of points  $X$  and amplitudes  $a$  are clear from context, we will drop the subscripts and write instead  $\gamma$ ,  $\mathbf{f}$ ,  $\eta$ , and so on.

**Metric induced distances** Given  $X = (x_j)_{j=1}^s \in \mathcal{X}^s$  and  $X' = (x'_j)_{j=1}^s \in \mathcal{X}^s$ , denote  $d_{\mathbf{H}}(X, X') \stackrel{\text{def}}{=} \sqrt{\sum_j d_{\mathbf{H}}(x_j, x'_j)^2}$ . Observe also that  $\mathbf{G}_X$  is positive definite for all  $X$  and induces a metric on  $\mathbb{R}^s \times \mathcal{X}^s$  so that given  $a, a' \in \mathbb{R}^s$  and  $X, X' \in \mathcal{X}^s$ ,

$$d_G((a, X), (a', X')) = \sqrt{\|a - a'\|_2^2 + d_{\mathbf{H}}(X, X')^2}.$$

**Stochastic gradient bounds** For  $r \in \mathbb{N}$ , define the following random variable

$$L_r(\omega) = \sup_{x \in \mathcal{X}} \|\mathbf{D}_r [\varphi_\omega] (x)\|,$$

and for  $i, j \in \mathbb{N}$ , define  $L_{ij}(\omega) \stackrel{\text{def.}}{=} \sqrt{L_i(\omega)^2 + L_j(\omega)^2}$ . For  $i = 0, 1, 2, 3$ , let  $F_i$  be such that

$$\mathbb{P}_\omega (L_j(\omega) > t) \leq F_i(t),$$

Throughout, for  $(\bar{L}_j)_{j=0}^3 \in \mathbb{R}_+^4$ , the event  $\bar{E}$  is defined as

$$\bar{E} \stackrel{\text{def.}}{=} \bigcap_{k=1}^m E_{\omega_k} \quad \text{where} \quad E_\omega \stackrel{\text{def.}}{=} \{L_j(\omega) \leq \bar{L}_j, \forall j = 0, 1, 2, 3\}. \quad (\text{A.4})$$

## B Proof of Theorem 2

In this section, we consider the (limit) vanishing derivative pre-certificate

$$\eta(x) = \mathbf{u}^\top \Upsilon_X^{-1} \mathbf{f}_X(x).$$

Note that

$$\mathbf{D}_2 [\eta] (x) = \sum_{i=1}^s \alpha_{1,i} K^{(02)}(x_i, x) + [\alpha_{2,i}] K^{(12)}(x_i, x)$$

where we have decomposed  $\alpha = [\alpha_{1,1}, \dots, \alpha_{1,s}, \alpha_{2,1}, \dots, \alpha_{2,s}] \in \mathbb{C}^{s(d+1)}$  where  $\alpha_{2,i} \in \mathbb{C}^d$ .

We aim to prove that  $\eta$  is nondegenerate if  $K$  is an admissible kernel. Our first lemma shows that nondegeneracy of  $\eta$  within each small neighbourhood of  $x_i$  can be established by controlling the real and imaginary parts of  $\mathbf{D}_2 [\eta]$  in each small region:

**Lemma B.1.** *Let  $\varepsilon > 0$ . Let  $x_0 \in \mathcal{X}$  and let  $\sigma \in \mathbb{C}$  be such that  $|\sigma| = 1$ . Suppose that  $\eta \in \mathcal{C}^2(\mathcal{X}; \mathbb{C})$  is such that  $\eta(x_0) = \sigma$ ,  $\nabla \eta(x_0) = 0$  and  $\text{Re}(\bar{\sigma} \mathbf{D}_2 [\eta] (x_0)) \prec -\varepsilon \text{Id}$ . Then,  $\nabla^2 |\eta|^2 (x_0) \prec -2\varepsilon \text{Id}$ . If in addition, we have  $c, r > 0$  with  $\varepsilon r < 1$  and  $c^2 \leq (1 - \varepsilon r^2)/(\varepsilon r^2)$  such that for all  $x$  such that  $d_{\mathbf{H}}(x, x_0) \leq r$ ,*

$$\text{Re}(\bar{\sigma} \mathbf{D}_2 [\eta] (x)) \prec -\varepsilon \text{Id} \quad \text{and} \quad \|\text{Im}(\bar{\sigma} \mathbf{D}_2 [\eta] (x))\| \leq c\varepsilon,$$

then,  $|\eta(x)|^2 \leq 1 - \varepsilon^2 d_{\mathbf{H}}(x, x_0)^2$  for all  $x$  such that  $d_{\mathbf{H}}(x, x_0) \leq r$ .

*Proof.* The first claim follows immediately from the computation: by writing  $\eta = \eta_r(x) + i\eta_i(x)$  where  $\eta_i$  and  $\eta_r$  are real valued functions,

$$\frac{1}{2} \mathbf{D}_2 [|\eta|^2] = \text{Re} \left( \overline{\mathbf{D}_1 [\eta]} \mathbf{D}_1 [\eta]^\top + \mathbf{D}_2 [\eta] \bar{\eta} \right),$$

and evaluation at  $x_0$  gives the required result.

Let  $\gamma : [0, 1] \rightarrow \mathcal{X}$  be a piecewise smooth path such that  $\gamma(0) = x_0$ ,  $\gamma(1) = x$ .

$$\begin{aligned} \eta(x) &= \eta(x_0) + \int_0^1 (1-t) \langle \nabla^2 \eta(\gamma(t)) \gamma'(t), \gamma'(t) \rangle dt \\ &= \eta(x_0) + \int_0^1 (1-t) \langle \mathbf{D}_2 [\eta] (\gamma(t)) \mathbf{H}_{\gamma(t)}^{\frac{1}{2}} \gamma'(t), \mathbf{H}_{\gamma(t)}^{\frac{1}{2}} \gamma'(t) \rangle dt. \end{aligned}$$

So,

$$\text{Re}(\bar{\sigma} \eta(x)) = 1 + \inf_\gamma \text{Re} \left( \bar{\sigma} \int_0^1 (1-t) \langle \mathbf{D}_2 [\eta] (\gamma(t)) \mathbf{H}_{\gamma(t)}^{\frac{1}{2}} \gamma'(t), \mathbf{H}_{\gamma(t)}^{\frac{1}{2}} \gamma'(t) \rangle dt \right) \leq 1 - \varepsilon d_{\mathbf{H}}(x, x_0)^2$$

if we minimise over all paths from  $x$  to  $x_0$ . Similarly,

$$\|\operatorname{Im}(\overline{\sigma}\eta(x))\| \leq c\varepsilon d_{\mathbf{H}}(x, x_0)^2$$

Therefore,

$$\begin{aligned} |\eta(x)|^2 &\leq |1 - \varepsilon d_{\mathbf{H}}(x, x_0)|^2 + |c\varepsilon d_{\mathbf{H}}(x, x_0)|^2 \\ &\leq 1 - 2\varepsilon d_{\mathbf{H}}(x, x_0)^2 + \varepsilon^2 d_{\mathbf{H}}(x, x_0)^4 + c^2 \varepsilon^2 d_{\mathbf{H}}(x, x_0)^4 \\ &= 1 - \varepsilon d_{\mathbf{H}}(x, x_0)^2 - \varepsilon d_{\mathbf{H}}(x, x_0)^2 (1 - \varepsilon d_{\mathbf{H}}(x, x_0)^2 (1 + c^2)) \leq 1 - \varepsilon d_{\mathbf{H}}(x, x_0)^2. \end{aligned}$$

□

*Proof of Theorem 2.* In order to show that  $\eta$  is  $(\varepsilon_0/2, \varepsilon_2/2)$ -nondegenerate, it is enough to show that

$$\forall x \in \mathcal{X}^{\text{far}}, \quad |\eta(x)| \leq 1 - \varepsilon_0/2 \quad (\text{B.1})$$

$$\forall x \in \mathcal{X}^{\text{near}}, \quad \operatorname{Re}(\overline{\operatorname{sign}(a_j)} D_2[\eta](x)) \prec -\frac{\varepsilon_2}{2} \operatorname{Id} \quad \text{and} \quad \left\| \operatorname{Im}(\overline{\operatorname{sign}(a_j)} D_2[\eta](x)) \right\| \leq \frac{p}{4} \varepsilon_2 \quad (\text{B.2})$$

where  $p = \sqrt{\frac{1 - \varepsilon_2 r_{\text{near}}^2/2}{\varepsilon_2 r_{\text{near}}^2/2}}$ .

We first prove that the matrix  $\Upsilon$  is invertible. To this end, we write

$$\Upsilon = \begin{pmatrix} \Upsilon_0 & \Upsilon_1^\top \\ \Upsilon_1 & \Upsilon_2 \end{pmatrix} \quad (\text{B.3})$$

where  $\Upsilon_0 \stackrel{\text{def.}}{=} (K(x_i, x_j))_{i,j=1}^s \in \mathbb{C}^{s \times s}$ ,  $\Upsilon_1 \stackrel{\text{def.}}{=} (K^{(10)}(x_i, x_j))_{i,j=1}^s \in \mathbb{C}^{sd \times s}$ , and  $\Upsilon_2 \stackrel{\text{def.}}{=} (K^{(11)}(x_i, x_j))_{i,j=1}^s \in \mathbb{C}^{sd \times sd}$ . By definition of  $K^{(ij)}$ ,  $\Upsilon$  (and also  $\Upsilon_0$  and  $\Upsilon_2$ ) has only 1's on its diagonal.

To prove the invertibility of  $\Upsilon$ , we use the Schur complement of  $\Upsilon$ , and in particular it suffices to prove that  $\Upsilon_2$  and the Schur complement  $\Upsilon_S \stackrel{\text{def.}}{=} \Upsilon_0 - \Upsilon_1 \Upsilon_2^{-1} \Upsilon_1^\top$  are both invertible. To show that  $\Upsilon_2$  is invertible, we define  $A_{ij} = K^{(11)}(x_i, x_j)$ . So  $\Upsilon_2$  has the form:

$$\Upsilon_2 = \begin{pmatrix} \operatorname{Id} & A_{12} & \dots & A_{1s} \\ A_{21} & \operatorname{Id} & \ddots & \vdots \\ \vdots & \ddots & \ddots & \vdots \\ A_{s1} & \dots & \dots & \operatorname{Id} \end{pmatrix}$$

and by Lemma G.6, we have

$$\|\operatorname{Id} - \Upsilon_2\|_{\text{block}} \leq \max_i \sum_j \|A_{ij}\| \leq 1/4.$$

Since  $\|\operatorname{Id} - \Upsilon_2\|_{\text{block}} < 1$ ,  $\Upsilon_2$  is invertible, and we have  $\|\Upsilon_2^{-1}\|_{\text{block}} \leq \frac{1}{1 - \|\operatorname{Id} - \Upsilon_2\|_{\text{block}}} \leq \frac{4}{3}$ . Next, again with Lemma G.6, we can bound

$$\begin{aligned} \|I - \Upsilon_0\|_\infty &= \max_i \sum_{j \neq i} |K(x_i, x_j)| \leq \frac{\varepsilon_0}{16} \\ \|\Upsilon_1\|_{\infty \rightarrow \text{block}} &\leq \max_i \sum_j \|K^{(10)}(x_i, x_j)\| \leq h \quad \text{since } K^{(10)}(x, x) = 0 \\ \|\Upsilon_1^\top\|_{\text{block} \rightarrow \infty} &\leq \max_i \sum_j \|K^{(10)}(x_j, x_i)\| \leq h \end{aligned}$$

Hence, we have

$$\|I - \Upsilon_S\|_\infty \leq \|I - \Upsilon_0\|_\infty + \|\Upsilon_1^\top\|_{\text{block} \rightarrow \infty} \|\Upsilon_2^{-1}\|_{\text{block}} \|\Upsilon_1\|_{\infty \rightarrow \text{block}} \leq \frac{\varepsilon_0}{16} + \frac{4}{3} h^2 \leq \frac{\varepsilon_0}{8} \quad (\text{B.4})$$

since  $h \leq \frac{\varepsilon_0}{32}$ . Therefore the Schur complement of  $\Upsilon$  is invertible and so is  $\Upsilon$ .

**Expression of  $\eta$ .** By definition,  $\eta$  satisfies  $\eta(x_i) = \text{sign}(a_i)$  and  $\nabla\eta(x_i) = 0$ .

We divide:

$$\alpha = \Upsilon^{-1}\mathbf{u}_s = \begin{pmatrix} \alpha_1 \\ \alpha_2 \end{pmatrix}$$

where  $\alpha_1 \in \mathbb{C}^s$  and  $\alpha_2 \in \mathbb{C}^{sd}$ , and we denote  $\alpha_{2,i} \in \mathbb{C}^d$  blocks such that  $\alpha_2 = [\alpha_{2,1}, \dots, \alpha_{2,s}]$ .

The Schur's complement of  $\Upsilon$  allows us to express  $\alpha_1$  and  $\alpha_2$  as

$$\alpha_1 = \Upsilon_S^{-1} \text{sign}(a), \quad \alpha_2 = -\Upsilon_2^{-1} \Upsilon_1 \Upsilon_S^{-1} \text{sign}(a) \quad (\text{B.5})$$

and therefore we can bound

$$\|\alpha_1\|_\infty \leq \frac{1}{1 - \varepsilon_0/8} \quad (\text{B.6})$$

$$\|\alpha_2\|_{\text{block}} \leq \frac{8}{3}h \leq 4h \quad (\text{B.7})$$

Moreover, we have

$$\|\alpha_1 - \text{sign}(a)\|_\infty \leq \|I - \Upsilon_S^{-1}\|_\infty \leq \|\Upsilon_S^{-1}\|_\infty \|I - \Upsilon_S\|_\infty \leq \frac{1}{4} \quad (\text{B.8})$$

**Non-degeneracy.** We can now prove that  $\eta$  is non-degenerate.

Let  $x$  be such that  $d_{\mathbf{H}}(x_i, x) \leq r_{\text{near}}$ . We need to prove that for all  $x$  such that  $d_{\mathbf{H}}(x, x_i) \leq r$ ,

$$\text{Re} \left( \overline{\text{sign}(a_i)} \mathbf{D}_2[\eta](x) \right) \prec -\frac{\varepsilon_2}{2} \text{Id} \quad \text{and} \quad \left\| \text{Im} \left( \overline{\text{sign}(a_i)} \mathbf{D}_2[\eta](x) \right) \right\| \leq \frac{\varepsilon_2}{2} \sqrt{\frac{2 - \varepsilon r_{\text{near}}^2}{\varepsilon_2 r_{\text{near}}^2}}.$$

Then, since  $r_{\text{near}} \leq \Delta/2$  and the  $x_i$ 's are  $\Delta$ -separated, for all  $j \neq i$  we have  $d_{\mathbf{H}}(x, x_j) \geq \Delta/2$ . Then, we have

$$\begin{aligned} \overline{\text{sign}(a_i)} \mathbf{D}_2[\eta](x) &= \overline{\text{sign}(a_i)} \left[ \alpha_{1,i} K^{(02)}(x_i, x) + \sum_{j \neq i} \alpha_{1,j} K^{(02)}(x_j, x) \right. \\ &\quad \left. + [\alpha_{2,i}] K^{(12)}(x_i, x) + \sum_{j \neq i} [\alpha_{2,j}] K^{(12)}(x_j, x) \right] \end{aligned}$$

$$\begin{aligned} \text{Re} \left( \overline{\text{sign}(a_i)} \mathbf{D}_2[\eta](x) \right) &\preccurlyeq (1 - \|\alpha_1 - \text{sign}(a)\|_\infty) \text{Re} \left( K^{(02)}(x_i, x) \right) + \|\alpha_1\|_\infty \sum_{j \neq i} \left\| K^{(02)}(x_j, x) \right\| \text{Id} \\ &\quad + \left( \left\| K^{(12)}(x_i, x) \right\| + \sum_{j \neq i} \left\| K^{(12)}(x_j, x) \right\| \right) \|\alpha_2\|_{\text{block}} \text{Id} \\ &\preccurlyeq \left( -\frac{3}{4}\varepsilon_2 + \frac{1}{1 - \varepsilon_0/8} \frac{\varepsilon_2}{16} + 4h(B_{12} + 1) \right) \text{Id} \preccurlyeq \varepsilon_2 \left( -\frac{3}{4} + \frac{1}{4} \right) \text{Id} \preccurlyeq -\frac{\varepsilon_2}{2} \text{Id}. \end{aligned}$$

Taking the imaginary part, we have

$$\begin{aligned} \left\| \text{Im} \left( \overline{\text{sign}(a_i)} \mathbf{D}_2[\eta](x) \right) \right\| &\leq (1 + \|\alpha_1 - \text{sign}(a)\|) \left\| \text{Im} \left( K^{(02)}(x_i, x) \right) \right\| + \|\alpha_1\|_\infty \sum_{j \neq i} \left\| K^{(02)}(x_j, x) \right\| \\ &\quad + \left( \left\| K^{(12)}(x_i, x) \right\| + \sum_{j \neq i} \left\| K^{(12)}(x_j, x) \right\| \right) \|\alpha_2\|_{\text{block}} \\ &\leq \left( \frac{5c\varepsilon_2}{4} + \frac{1}{(1 - \varepsilon_0/8)} h + 4h(B_{12} + 1) \right) \leq \frac{5c\varepsilon_2}{4} + h(4B_{12} + 6) \leq \frac{\varepsilon_2}{2} \sqrt{\frac{2 - \varepsilon r_{\text{near}}^2}{\varepsilon_2 r_{\text{near}}^2}}. \end{aligned}$$

So, by Lemma B.1, for each  $i = 1, \dots, s$ ,  $|\eta(x)| \leq 1 - \varepsilon_2/2d_{\mathbf{H}}(x, x_i)$  for all  $x \in \mathcal{X}$  such that  $d_{\mathbf{H}}(x, x_i) \leq r_{\text{near}}$ .

Next, for any  $x$  such that  $d_{\mathbf{H}}(x, x_i) \geq r_{\text{near}}$  for all  $x_i$ 's, we can say that there exists (at most) one index  $i$  such that  $d_{\mathbf{H}}(x, x_i) \geq r_{\text{near}}$  and for all  $j \neq i$  we have  $d_{\mathbf{H}}(x, x_j) \geq \Delta/2$ . We have

$$\begin{aligned}
|\eta(x)| &= \left| \alpha_{1,i} K(x_i, x) + \sum_{j \neq i} \alpha_{1,j} K(x_j, x) \right. \\
&\quad \left. + K^{(10)}(x_i, x)^\top \alpha_{2,i} + \sum_{j \neq i} K^{(10)}(x_j, x)^\top \alpha_{2,j} \right| \\
&\leq \|\alpha_1\|_\infty \left( |K(x_i, x)| + \sum_{j \neq i} |K(x_j, x)| \right) \\
&\quad + \|\alpha_2\|_{\text{block}} \left( \|K^{(10)}(x_i, x)\| + \sum_{j \neq i} \|K^{(10)}(x_j, x)\| \right) \\
&\leq \frac{1 - \varepsilon_0 + \varepsilon_0/16}{1 - \varepsilon_0/8} + 4h(B_{10} + 1) \leq 1 - \frac{\varepsilon_0}{2}.
\end{aligned}$$

□

**Remark B.1.** Assuming that the derivatives of the kernel decay like a function  $f(\|x - x'\|)$  when, there is always a separation  $\Delta \propto f^{-1}(1/(Cs_{\text{max}}))$  such that the kernel is admissible. Ex: when  $f = x^{-p}$ , we have  $\Delta \propto s_{\text{max}}^{1/p}$  (eg Cauchy). When  $f = e^{-x^p}$ , we have  $\Delta \propto \log^{1/p}(s_{\text{max}})$  (eg Gaussian).

## C Preliminaries

In this section, we present some preliminary results which will be used for proving our main results. We assume that  $K$  is admissible, and given a set of points  $X \in \mathcal{X}^s$ , let  $\mathcal{X}_j^{\text{near}} \stackrel{\text{def.}}{=} \{x \in \mathcal{X} ; d_{\mathbf{H}}(x, x_j) \leq r_{\text{near}}\}$ ,  $\mathcal{X}^{\text{near}} \stackrel{\text{def.}}{=} \bigcup_{j=1}^s \mathcal{X}_j^{\text{near}}$  and  $\mathcal{X}^{\text{far}} \stackrel{\text{def.}}{=} \mathcal{X} \setminus \mathcal{X}^{\text{near}}$ .

### C.1 On the deterministic kernel

For an admissible kernel, we have the following additional bounds that will be handy.

**Lemma C.1.** Assume  $K$  is an admissible kernel, let  $X \in \mathcal{X}^s$  be  $\Delta$ -separated points. Then we have the following:

(i)  $\Upsilon$  is invertible and satisfies

$$\|\text{Id} - \Upsilon\| \leq \frac{1}{2} \quad \text{and} \quad \|\text{Id} - \Upsilon\|_{\text{Block}} \leq \frac{1}{2}. \quad (\text{C.1})$$

(ii) For any vector  $q \in \mathbb{C}^{s(d+1)}$  and any  $x \in \mathcal{X}^{\text{far}}$ , we have

$$\|\mathbf{f}(x)\| \leq B_0 \quad \text{and} \quad |q^\top \mathbf{f}(x)| \leq B_0 \|q\|_{\text{Block}} \quad (\text{C.2})$$

(iii) For any vector  $q \in \mathbb{C}^{s(d+1)}$  and any  $x \in \mathcal{X}^{\text{near}}$  we have the bound:

$$\|\mathbf{D}_2 [q^\top \mathbf{f}(\cdot)](x)\| \leq \|q\| B_2 \quad \text{and} \quad \|\mathbf{D}_2 [q^\top \mathbf{f}(\cdot)](x)\| \leq \|q\|_{\text{Block}} B_2 \quad (\text{C.3})$$

*Proof.* We bound the spectral norm of  $\text{Id} - \Upsilon$ . Define  $y \in \mathbb{C}^{s(d+1)}$  decomposed as  $y = [y_1, \dots, y_s, Y_1, \dots, Y_s]$  where  $Y_i \in \mathbb{R}^d$ , such that  $\|y\| \leq 1$ . We have

$$\begin{aligned}
\|(\text{Id} - \Upsilon)y\|^2 &= \sum_{i=1}^s \left| \sum_{j \neq i} K(x_i, x_j) y_j + \sum_{j=1}^s K^{(10)}(x_i, x_j)^\top Y_j \right|^2 \\
&\quad + \left\| \sum_j y_j K^{(10)}(x_i, x_j) + \sum_{j \neq i} K^{(11)}(x_i, x_j) Y_j \right\|^2 \\
&\leq \sum_{i=1}^s \left( \sum_{j \neq i} |K(x_i, x_j)| |y_j| + \sum_{j=1}^s \|K^{(10)}(x_i, x_j)\| \|Y_j\| \right)^2 \\
&\quad + \left( \sum_j |y_j| \|K^{(10)}(x_i, x_j)\| + \sum_{j \neq i} \|K^{(11)}(x_i, x_j)\| \|Y_j\| \right)^2 \\
&\leq \max_{d_{\mathbf{H}}(x, x') \geq \Delta} \left( |K(x, x')|, \|K^{(10)}(x, x')\|, \|K^{(11)}(x, x')\| \right)^2 \sum_i 2 \left( \sum_j |y_j| + \|Y_j\| \right)^2 \\
&\leq 4s^2 \max_{d_{\mathbf{H}}(x, x') \geq \Delta} \left( |K(x, x')|, \|K^{(10)}(x, x')\|, \|K^{(11)}(x, x')\| \right)^2
\end{aligned}$$

by Cauchy-Schwartz inequality and since  $K^{(10)}(x, x) = 0$  for all  $x \in \mathcal{X}$ . Since by hypothesis we have

$$\max_{d_{\mathbf{H}}(x, x') \geq \Delta} \left( |K(x, x')|, \|K^{(10)}(x, x')\|, \|K^{(11)}(x, x')\| \right) \leq \frac{1}{4s_{\max}},$$

we obtain

$$\|\text{Id} - \Upsilon\| \leq \frac{1}{2} \tag{C.4}$$

and we deduce (i). A near identical argument also yields  $\|\Upsilon - \text{Id}\|_{\text{Block}} \leq \frac{1}{4}$ .

For (ii), let  $x \in \mathcal{X}^{\text{far}}$ , then we have

$$\begin{aligned}
\|\mathbf{f}(x)\| &\leq \left( \sum_{i=1}^s |K(x_i, x)|^2 + \|K^{(10)}(x_i, x)\|^2 \right)^{\frac{1}{2}} \\
&\leq \left( B_{00}^2 + \frac{(s-1)\varepsilon_0^2}{(16s_{\max})^2} + B_{10}^2 + \frac{(s-1)}{s_{\max}^2} \right)^{\frac{1}{2}} \leq B_0
\end{aligned}$$

for which, similar to the proof above, we have used the fact that  $x$  is  $\Delta/2$ -separated from at least  $s-1$  points  $x_i$ . Similarly, for any vector  $q = [q_1, \dots, q_s, Q_1, \dots, Q_s] \in \mathbb{C}^{s(d+1)}$  and any  $x \in \mathcal{X}^{\text{far}}$ , we have

$$\begin{aligned}
\|q^\top \mathbf{f}(x)\| &\leq \sum_{i=1}^s |q_i| |K(x_i, x)| + \|Q_i\| \|K^{(10)}(x_i, x)\| \\
&\leq \|q\|_{\text{Block}} \left( B_{00} + \frac{(s-1)\varepsilon_0}{32s_{\max}} + B_{10} + \frac{(s-1)\varepsilon_0}{32s_{\max}} \right) \leq B_0 \|q\|_{\text{Block}}.
\end{aligned}$$

For any  $x \in \mathcal{X}^{\text{near}}$  we have the bound:

$$\begin{aligned} \|\mathbf{D}_2 [q^\top \mathbf{f}] (x)\| &= \left\| \sum_{i=1}^s q_i K^{(02)}(x_i, x) + [Q_i] K^{(12)}(x_i, x) \right\| \\ &\leq \|q\| \left( \sum_{i=1}^s \|K^{(02)}(x_i, x)\|^2 + \|K^{(12)}(x_i, x)\|^2 \right)^{\frac{1}{2}} \\ &\leq \|q\| B_2 \end{aligned}$$

and

$$\begin{aligned} \|\mathbf{D}_2 [q^\top \mathbf{f}] (x)\| &= \left\| \sum_{i=1}^s q_i K^{(02)}(x_i, x) + [Q_i] K^{(12)}(x_i, x) \right\| \\ &\leq \|q\|_{\text{Block}} \left( \sum_{i=1}^s \|K^{(02)}(x_i, x)\| + \|K^{(12)}(x_i, x)\| \right) \\ &\leq \|q\|_{\text{Block}} B_2 \end{aligned}$$

□

## C.2 Lipschitz bounds

**Lemma C.2** (Local Lipschitz constant of  $\varphi_\omega$  and higher order derivatives). *Suppose that  $\|\mathbf{D}_j [\varphi_\omega] (x)\| \leq \bar{L}_j$  for all  $x \in \mathcal{X}$ . For all  $x, x'$  with  $d_{\mathbf{H}}(x, x') \leq r_{\text{near}}$ , we have*

- (i)  $|\varphi_\omega(x) - \varphi_\omega(x')| \leq \mathcal{L}_0 d_{\mathbf{H}}(x, x')$ ,
- (ii)  $\|\mathbf{D}_1 [\varphi_\omega] (x) - \mathbf{D}_1 [\varphi_\omega] (x')\| \leq \mathcal{L}_1 d_{\mathbf{H}}(x, x')$ ,
- (iii)  $\|\mathbf{D}_2 [\varphi_\omega] (x) - \mathbf{D}_2 [\varphi_\omega] (x')\| \leq \mathcal{L}_2 d_{\mathbf{H}}(x, x')$ ,

where  $\mathcal{L}_0 \stackrel{\text{def.}}{=} \bar{L}_1$ ,  $\mathcal{L}_1 \stackrel{\text{def.}}{=} \bar{L}_1 C_{\mathbf{H}} + \bar{L}_2(1 + C_{\mathbf{H}} r_{\text{near}})$  and  $\mathcal{L}_2 \stackrel{\text{def.}}{=} \bar{L}_2 (C_{\mathbf{H}} + C_{\mathbf{H}}^2 r_{\text{near}} + 1) + \bar{L}_3(1 + C_{\mathbf{H}} r_{\text{near}})^2$ . As a consequence, for all  $X = (x_j)$  and  $X' = (x'_j)$  such that  $d_{\mathbf{H}}(x_j, x'_j) \leq r_{\text{near}}$ , we have

$$\sup_{\|q\|=1} \left\| \mathbf{D}_r [q^\top (\hat{\mathbf{f}}_X - \hat{\mathbf{f}}_{X'})] (y) \right\| \leq \bar{L}_r \sqrt{\mathcal{L}_0^2 + \mathcal{L}_1^2} d_{\mathbf{H}}(X, X').$$

*Proof.* Let  $x, x' \in \mathcal{X}$  with  $d_{\mathbf{H}}(x, x') \leq r_{\text{near}}$ . Recall that  $\left\| \mathbf{H}_{x'}^{\frac{1}{2}} \mathbf{H}_x^{-\frac{1}{2}} - \text{Id} \right\| \leq C_{\mathbf{H}} d_{\mathbf{H}}(x, x')$ , and so,  $\left\| \mathbf{H}_{x'}^{\frac{1}{2}} \mathbf{H}_x^{-\frac{1}{2}} \right\| \leq 1 + C_{\mathbf{H}} r_{\text{near}}$ .

Let  $p : [0, 1] \rightarrow \mathcal{X}$  be a piecewise smooth path such that  $p(0) = x'$ ,  $p(1) = x$ . Then, by Taylor's theorem,

$$\varphi_\omega(x) - \varphi_\omega(x') = \int_{t=0}^1 \langle \mathbf{H}_{p(t)}^{-\frac{1}{2}} \nabla \varphi_\omega(p(t)), \mathbf{H}_{p(t)}^{\frac{1}{2}} p'(t) \rangle dt \leq \bar{L}_1 \int_0^1 \left\| \mathbf{H}_{p(t)}^{\frac{1}{2}} p'(t) \right\| dt \quad (\text{C.5})$$

so taking the minimum over all paths  $p$  yields  $|\varphi_\omega(x) - \varphi_\omega(x')| \leq \bar{L}_1 d_{\mathbf{H}}(x, x')$ .

Given  $q \in \mathbb{R}^d$ , by Taylor's theorem,

$$\begin{aligned} \mathbf{D}_1 [\varphi_\omega] (x)[q] &= \nabla \varphi(x) [\mathbf{H}_x^{-\frac{1}{2}} q] = \nabla \varphi(x') [\mathbf{H}_x^{-\frac{1}{2}} q] + \int \nabla^2 \varphi_\omega(p(t)) [\mathbf{H}_x^{-\frac{1}{2}} q, p'(t)] dt \\ &= \mathbf{D}_1 [\varphi_\omega] (x')[q] + \mathbf{D}_1 [\varphi_\omega] (x') [(\mathbf{H}_{x'}^{\frac{1}{2}} \mathbf{H}_x^{-\frac{1}{2}} - \text{Id})q] + \int \mathbf{D}_2 [\varphi_\omega] (p(t)) [\mathbf{H}_{p(t)}^{\frac{1}{2}} \mathbf{H}_x^{-\frac{1}{2}} q, \mathbf{H}_{p(t)}^{\frac{1}{2}} p'(t)] dt \end{aligned} \quad (\text{C.6})$$

Therefore,

$$\|\mathbf{D}_1 [\varphi_\omega] (x) - \mathbf{D}_1 [\varphi_\omega] (x')\| \leq \bar{L}_1 C_{\mathbf{H}} d_{\mathbf{H}}(x, x') + \bar{L}_2(1 + C_{\mathbf{H}} r_{\text{near}}) d_{\mathbf{H}}(x, x').$$



Finally, for all  $q_1, q_2 \in \mathbb{R}^d$ , by Taylor's theorem

$$\begin{aligned}
& \mathbf{D}_2 [\varphi_\omega] (x)[q_1, q_2] - \mathbf{D}_2 [\varphi_\omega] (x')[q_1, q_2] \\
&= \nabla^2 \varphi_\omega (x)[\mathbf{H}_x^{-\frac{1}{2}} q_1, \mathbf{H}_x^{-\frac{1}{2}} q_2] - \nabla^2 \varphi_\omega (x')[\mathbf{H}_{x'}^{-\frac{1}{2}} q_1, \mathbf{H}_{x'}^{-\frac{1}{2}} q_2] \\
&= \mathbf{D}_2 [\varphi_\omega] (x')[\mathbf{H}_{x'}^{\frac{1}{2}} \mathbf{H}_x^{-\frac{1}{2}} q_1, (\mathbf{H}_{x'}^{\frac{1}{2}} \mathbf{H}_x^{-\frac{1}{2}} - \text{Id}) q_2] + \mathbf{D}_2 [\varphi_\omega] (x')[(\mathbf{H}_{x'}^{\frac{1}{2}} \mathbf{H}_x^{-\frac{1}{2}} - \text{Id}) q_1, q_2] \\
&\quad + \int \mathbf{D}_3 [\varphi_\omega] (p(t))[\mathbf{H}_{p(t)}^{\frac{1}{2}} \mathbf{H}_x^{-\frac{1}{2}} q_1, \mathbf{H}_{p(t)}^{\frac{1}{2}} \mathbf{H}_x^{-\frac{1}{2}} q_2, \mathbf{H}_{p(t)}^{\frac{1}{2}} p'(t)] dt.
\end{aligned} \tag{C.7}$$

Therefore,

$$\|\mathbf{D}_2 [\varphi_\omega] (x) - \mathbf{D}_2 [\varphi_\omega] (x')\| \leq (\bar{L}_2 ((1 + C_{\mathbf{H}r_{\text{near}}}) C_{\mathbf{H}} + 1) + \bar{L}_3 (1 + C_{\mathbf{H}r_{\text{near}}})^2) d_{\mathbf{H}}(x, x').$$

By applying these Lipschitz bounds, we obtain

$$\begin{aligned}
& \sup_{\|q\|=1} \left\| \mathbf{D}_r \left[ q^\top (\hat{\mathbf{f}}_X - \hat{\mathbf{f}}_{X'}) \right] (y) \right\|^2 \\
&\leq \sum_{j=1}^s \left\| \hat{K}^{(0r)}(x_j, y) - \hat{K}^{(0r)}(x'_j, y) \right\|^2 + \sum_{j=1}^s \left\| \hat{K}^{(1r)}(x_j, y) - \hat{K}^{(1r)}(x'_j, y) \right\|^2 \\
&\leq \sum_{j=1}^s \mathcal{L}_0^2 \bar{L}_r^2 d_{\mathbf{H}}(x_j, x'_j)^2 + \sum_{j=1}^s \mathcal{L}_1^2 \bar{L}_r^2 d_{\mathbf{H}}(x_j, x'_j)^2 \\
&= (\mathcal{L}_0^2 + \mathcal{L}_1^2) \bar{L}_r^2 d_{\mathbf{H}}(X, X')^2
\end{aligned}$$

□

**Lemma C.3** (Local Lipschitz constant of  $\hat{K}^{(ij)}$ ). *Let  $x_1, x_0 \in \mathcal{X}$ . Let  $i, j \in \{0, 1, 2\}$  with  $i + j \leq 3$ . Define*

$$A_{ij} = \sup_x \left\| \hat{K}^{(ij)}(x, x_0) \right\|$$

where  $x$  ranges over  $d_{\mathbf{H}}(x, x_1) \leq r_{\text{near}}$ . Then, for all  $x$  such that  $d_{\mathbf{H}}(x, x_1) \leq r_{\text{near}}$ ,

$$\begin{aligned}
& \left\| \hat{K}^{(0j)}(x, x_0) - \hat{K}^{(0j)}(x_1, x_0) \right\| \leq A_{1j} d_{\mathbf{H}}(x, x_1) \\
& \left\| \hat{K}^{(1j)}(x, x_0) - \hat{K}^{(1j)}(x_1, x_0) \right\| \leq (C_{\mathbf{H}} A_{1j} + (1 + C_{\mathbf{H}r_{\text{near}}}) A_{2j}) d_{\mathbf{H}}(x, x_1)
\end{aligned}$$

The same results hold if we replace  $\hat{K}$  by  $K$ .

*Proof.* The Lipschitz bounds on  $\hat{K}^{ij}$  follow by combining

$$\begin{aligned}
& [q_1, \dots, q_i] (\hat{K}^{(ij)}(x, x_0) - \hat{K}^{(ij)}(x_1, x_0)) [v_1, \dots, v_j] \\
&= \hat{\mathbb{E}} \text{Re} \left( \overline{(\mathbf{D}_i [\varphi_\omega] (x) - \mathbf{D}_i [\varphi_\omega] (x_1)) [q_1, \dots, q_i] \mathbf{D}_j [\varphi_j] (x_0) [v_1, \dots, v_j]} \right)
\end{aligned}$$

where  $\hat{\mathbb{E}}$  indicates either empirical expectation or true expectation with (C.5), (C.6) and (C.7).

□

### C.3 Probability bounds

In the proof of our main results, we will often assume that event  $\bar{E}$  (see (A.4)) holds since our assumptions in Section 2.3 of the main paper imply that  $\mathbb{P}(\bar{E}^c) \leq \rho/m$ . The following lemma shows that our assumptions also imply that  $\mathbb{E}_\omega [L_i(\omega)^2 1_{E_i^c}] \leq \frac{\epsilon}{m}$ . and this is a condition which our proofs will often rely upon.

**Lemma C.4.** *The following holds.  $\mathbb{P}(E_\omega^c) \leq \sum_i F_i(\bar{L}_i)$  and*

$$\mathbb{E}_\omega[L_j(\omega)^2 \mathbf{1}_{E_\omega^c}] \leq 2 \int_{\bar{L}_j}^\infty t F_j(t) dt + \bar{L}_j^2 \sum_i F_i(\bar{L}_i)$$

*Proof.* Let  $E_{\omega,j}$  be the event that  $L_r(\omega) \leq \bar{L}_j$ , so  $E_\omega = \bigcap_{j=0}^3 E_{\omega,j}$ . By the union bound,  $\mathbb{P}(E_\omega^c) \leq \sum_j \mathbb{P}(E_{\omega,j}^c) \leq \sum_i F_i(\bar{L}_i)$ .

For the second claim, observe that  $E_\omega^c = \bigcup_i E_{\omega,i}^c$ , so that  $\mathbb{E}[L_j(\omega)^2 \mathbf{1}_{E_\omega^c}] \leq \sum_i \mathbb{E}[L_j(\omega)^2 \mathbf{1}_{E_{\omega,i}^c}]$  and we have

$$\begin{aligned} \mathbb{E}[L_j(\omega)^2 \mathbf{1}_{E_{\omega,i}^c}] &= \int_0^\infty \mathbb{P}(L_j(\omega)^2 \mathbf{1}_{E_{\omega,i}^c} \geq t) dt \\ &= \int_0^\infty \mathbb{P}((L_j(\omega)^2 \geq t) \cap (L_i(\omega) \geq \bar{L}_i)) dt \\ &\leq \bar{L}_j^2 F_i(\bar{L}_i) + \int_{\bar{L}_j^2}^\infty F_j(\sqrt{t}) dt = \bar{L}_j^2 F_i(\bar{L}_i) + 2 \int_{\bar{L}_j}^\infty t F_j(t) dt \end{aligned}$$

where we have bounded  $\mathbb{P}((L_j(\omega)^2 \geq t) \cap (L_i(\omega) \geq \bar{L}_i))$  by respectively  $\mathbb{P}(L_i(\omega) \geq \bar{L}_i) \leq F_i(\bar{L}_i)$  in the first term and by  $\mathbb{P}(L_j(\omega)^2 \geq t) \leq F_j(\sqrt{t})$  in the second term.  $\square$

### C.3.1 Concentration inequalities

The following result is an adaption of the Matrix Bernstein inequality for dealing with conditional probabilities.

**Lemma C.5** (Adapted unbounded Matrix Bernstein). *Let  $A_j \in \mathbb{R}^{d_1 \times d_2}$  be a family of iid matrices for  $j = 1, \dots, m$ . Let  $Z = \frac{1}{m} \sum_{j=1}^m A_j$  and let  $\bar{Z} = \mathbb{E}[Z]$ . Let  $t \in (0, 4 \|\mathbb{E}[A_1]\|)$ . Let events  $E_j$  be independent events such that  $E_j \subseteq \{\|A_j\| \leq L\}$  and let  $E = \bigcap_j E_j$ . Suppose that we have*

$$\mathbb{P}(E_j^c) \leq \frac{t}{t + 4 \|\mathbb{E}[A_1]\|} \quad \text{and} \quad \mathbb{E}[\|A_j\| \mathbf{1}_{E_j^c}] \leq \frac{t}{4}$$

*Then a first consequence is that we have  $\mathbb{E}_E[Z] = \mathbb{E}_{E_j}[A_j]$  for all  $j$  and  $\|\mathbb{E}[Z] - \mathbb{E}_E[Z]\| \leq \frac{t}{2}$ .*

*Finally, assuming that*

$$\sigma^2 \stackrel{\text{def}}{=} \max_j \{ \|\mathbb{E}_{E_j}[A_j A_j^*]\|, \|\mathbb{E}_{E_j}[A_j^* A_j]\| \} < \infty$$

*we have*

$$\mathbb{P}_E(\|Z - \mathbb{E}[Z]\| \geq t) \leq (d_1 + d_2) \exp\left(-\frac{mt^2/4}{\sigma^2 + Lt/3}\right).$$

*Proof.* We first bound  $\|\mathbb{E}[Z] - \mathbb{E}_E[Z]\|$ . First observe that  $\mathbb{E}[Z] = \mathbb{E}_{E_1}[A_1]$  and  $\mathbb{E}_E Z = \mathbb{E}_{E_1}[A_1]$  since  $A_j$  are iid. Moreover,

$$\mathbb{E}[A_1] = \mathbb{E}[A_1 \mathbf{1}_{E_1}] + \mathbb{E}[A_1 \mathbf{1}_{E_1^c}] = \mathbb{E}[A_1 | E_1] \mathbb{P}(E_1) + \mathbb{E}[A_1 \mathbf{1}_{E_1^c}].$$

Hence,

$$\begin{aligned} \|\mathbb{E}[A_1] - \mathbb{E}_{E_1}[A_1]\| &= \|(P(E_1) - 1)\mathbb{E}_{E_1}[A_1] + \mathbb{E}[A_1 \mathbf{1}_{E_1^c}]\| \\ &\leq P(E_1^c) \|\mathbb{E}[A_1]\| + P(E_1^c) \|\mathbb{E}[A_1] - \mathbb{E}_{E_1}[A_1]\| + \mathbb{E}[\|A_1\| \mathbf{1}_{E_1^c}]. \end{aligned}$$

Therefore,

$$\|\mathbb{E}[A_1] - \mathbb{E}_{E_1}[A_1]\| \leq \frac{P(E_1^c) \|\mathbb{E}[A_1]\| + \mathbb{E}[\|A_1\| \mathbf{1}_{E_1^c}]}{1 - P(E_1^c)} \leq \frac{t}{2}$$

For the second statement,

$$\begin{aligned}\mathbb{P}_E(\|Z - \mathbb{E}[Z]\| \geq t) &\leq \mathbb{P}_E(\|Z - \mathbb{E}_E[Z]\| \geq t - \|\mathbb{E}[Z] - \mathbb{E}_E[Z]\|) \\ &\leq \mathbb{P}_E(\|Z - \mathbb{E}_E[Z]\| \geq t/2).\end{aligned}$$

To conclude, we apply Bernstein's inequality (Lemma G.2) to  $Y_j = A_j - \mathbb{E}[A_j|E] = Y_j = A_j - \mathbb{E}[A_j|E_j]$  conditional to  $E$ . Observe that

$$0 \preceq \mathbb{E}_E[Y_j Y_j^\top] \preceq \mathbb{E}_E[A_j A_j^\top] - \mathbb{E}_E[A_j] \mathbb{E}_E[A_j]^\top \preceq \mathbb{E}_E[A_j A_j^\top],$$

which yields  $\|\mathbb{E}_E[Y_j Y_j^\top]\| \leq \|\mathbb{E}[A_j A_j^\top]\|$  and similarly,  $\|\mathbb{E}_E[Y_j^\top Y_j]\| \leq \|\mathbb{E}[A_j^\top A_j]\|$ . So by Bernstein's inequality

$$\mathbb{P}_E(\|Z - \mathbb{E}_E[Z]\| \geq t/2) \leq 2(d_1 + d_2) \exp\left(-\frac{mt^2/4}{\sigma^2 + Lt/3}\right).$$

□

**Corollary C.1.** *Let  $x, x' \in \mathcal{X}$ . If*

$$\mathbb{P}(E_\omega^c) \leq \frac{t}{t+4} \frac{1}{\|K^{(ij)}(x, x')\|} \quad \text{and} \quad \mathbb{E}[L_{ij}(\omega) \mathbf{1}_{E_\omega^c}] \leq \frac{t}{4}$$

then  $\|K_{\bar{E}}^{(ij)}(x, x') - K^{(ij)}(x, x')\| \leq t/2$ .

**Proposition C.1.** *Let  $t > 0$  and assume that*

$$\mathbb{P}(E_\omega^c) \leq \frac{t}{t+6} \quad \text{and} \quad \mathbb{E}[L_{01}(\omega)^2 \mathbf{1}_{E_\omega^c}] \leq \frac{t}{4s}$$

then  $\|\Upsilon - \Upsilon_{\bar{E}}\| \leq t/2$  and

$$\mathbb{P}_E(\|\Upsilon - \hat{\Upsilon}\| \geq t) \leq 4(d+1)s \exp\left(-\frac{mt^2/4}{s\bar{L}_{01}^2(3+t/3)}\right)$$

Consequently,

$$\mathbb{P}_{\bar{E}}(\|\Upsilon^{-1} - \hat{\Upsilon}^{-1}\| \geq t) \leq 4(d+1)s \exp\left(-\frac{mt^2}{16s\bar{L}_{01}^2(3+2\tilde{t})}\right).$$

*Proof.* We apply Lemma C.5 to  $A_j = \gamma(\omega_j)\gamma(\omega_j)^*$  with the following observations:

- for each  $\omega$ ,

$$\|\gamma(\omega)\gamma(\omega)^*\| \leq \|\gamma(\omega)\|^2 \leq s \max_{x \in \mathcal{X}} \{\|\mathbf{D}_1[\varphi_\omega](x)\|^2 + |\varphi_\omega(x)|^2\},$$

so under event  $\bar{E}$ ,  $\|A_j\| \leq s\bar{L}_{01}^2$ .

- By Lemma C.1,  $\|\mathbb{E}[A_j]\| = \|\Upsilon\| \leq 3/2$ ,
- We may set  $\sigma^2 = \bar{L}_{01}(3/2 + t/2)$  since

$$0 \preceq \mathbb{E}_{\bar{E}}[A_1 A_1^*] = \mathbb{E}_{\bar{E}}[A_1^* A_1] = \mathbb{E}_{\bar{E}}[\|\gamma(\omega_j)\|^2 \gamma(\omega_j)\gamma(\omega_j)^*] \preceq \bar{L}_{01}(\|\mathbb{E}[A_j]\| + t/2)\text{Id}.$$

The last claim is because  $\|\Upsilon - \hat{\Upsilon}\| \leq t$  implies that  $\|\Upsilon\| \leq 3/2 + t$ ,  $\|\Upsilon^{-1}\| \leq \frac{\|\Upsilon\|}{1 - \|\Upsilon - \hat{\Upsilon}\|\|\Upsilon^{-1}\|} \leq \frac{3}{2-4t}$  and  $\|\Upsilon^{-1} - \hat{\Upsilon}^{-1}\| \leq \|\Upsilon^{-1}\| \|\Upsilon - \hat{\Upsilon}\| \|\hat{\Upsilon}^{-1}\| \leq \frac{3t}{1-2t}$  and writing  $\tilde{t} = \frac{3t}{1-2t}$  is equivalent to  $t = \tilde{t}/(3+2\tilde{t})$ . □

**Bounds on  $\hat{\mathbf{f}}_X$  applied to a fixed vector**

**Proposition C.2.** Let  $t \in (0, 1)$ ,  $r \in \{0, 2\}$ ,  $q \in \mathbb{C}^{s(d+1)}$  and  $y \in \mathcal{X}_r$ , where  $\mathcal{X}_0 \stackrel{\text{def}}{=} \mathcal{X}$  and  $\mathcal{X}_2 \stackrel{\text{def}}{=} \mathcal{X}^{\text{near}}$ . If

$$\mathbb{P}(E_\omega^c) \leq \frac{t}{t + 4B_r} \quad \text{and} \quad \mathbb{E}[L_{01}(\omega)L_r(\omega)\mathbf{1}_{E_\omega^c}] \leq \frac{t}{4\sqrt{s}}$$

then

$$\mathbb{P}_{\bar{E}} \left( \left\| \mathbf{D}_r \left[ (\hat{\mathbf{f}}_{X_0} - \mathbf{f}_{X_0})^\top q \right] (y) \right\| \geq t \|q\| \right) \leq 2\tilde{d} \exp \left( \frac{-mt^2/4}{2\bar{L}_r^2 + \bar{L}_r \bar{L}_{01} t / (3\sqrt{s})} \right)$$

where  $\tilde{d} = 1$  if  $r = 0$  and  $\tilde{d} = d$  if  $r = 2$ .

As a consequence, since  $\sqrt{2s} \|q\|_{\text{Block}} \geq \|q\|_2$ , we have

$$\mathbb{P}_E \left( \left\| \mathbf{D}_r \left[ (\hat{\mathbf{f}}_{X_0} - \mathbf{f}_{X_0})^\top q \right] (y) \right\| \geq t \|q\|_{\text{Block}} \right) \leq 2\tilde{d} \exp \left( \frac{-mt^2}{16s(\bar{L}_r^2 + 8\bar{L}_r \bar{L}_{01} t / (3\sqrt{2}))} \right)$$

provided that

$$\mathbb{P}(E_\omega^c) \leq \frac{t}{t + 4\sqrt{2s}B_r} \quad \text{and} \quad \mathbb{E}[L_{01}(\omega)L_r(\omega)\mathbf{1}_{E_\omega^c}] \leq \frac{t}{4\sqrt{2s}}.$$

*Proof.* Without loss of generality, assume that  $\|q\| = 1$ . First note that

$$\mathbf{D}_r \left[ (\hat{\mathbf{f}}_{X_0} - \mathbf{f}_{X_0})^\top q \right] (y) = \frac{1}{m} \sum_{k=1}^m q^\top \gamma(\omega_k) \mathbf{D}_r [\varphi_{\omega_k}] (y) - \mathbb{E}[q^\top \gamma(\omega_k) \mathbf{D}_r [\varphi_{\omega_k}] (y)].$$

We first consider the case of  $r = 0$ . We apply Lemma C.5 to  $A_k \stackrel{\text{def}}{=} q^\top \gamma(\omega_k) \varphi_{\omega_k}(y) \in \mathbb{C}$ : Note that  $|A_k| \leq \sqrt{s} L_{01}(\omega_k) L_0(\omega_k)$  and  $|\mathbb{E}[A_k]| \leq B_0$ .

- Under event  $E_{\omega_k}$ ,  $|A_k| \leq \bar{L}_2 \bar{L}_{01} \sqrt{s} \stackrel{\text{def}}{=} L$ .
- $\mathbb{E}_{\bar{E}} |A_k|^2 = \mathbb{E}_{\bar{E}} [|\langle \gamma(\omega_k) \gamma(\omega_k)^* q, q \rangle \varphi_{\omega_k}(y)|^2] \leq \bar{L}_0^2 \|\Upsilon_{\bar{E}}\| \leq (3/2 + t/2) \bar{L}_0^2 \leq 2\bar{L}_0^2 \stackrel{\text{def}}{=} \sigma^2$ .

For the case  $r = 2$ , we apply Lemma C.5 with  $A_k \stackrel{\text{def}}{=} q^\top \gamma(\omega_k) \mathbf{D}_2 [\varphi_{\omega_k}] (y) \in \mathbb{C}^{d \times d}$ . Then,  $\|A_k\| \leq \sqrt{s} L_{01}(\omega_k) L_2(\omega_k)$ ,  $\|\mathbb{E}[A_k]\| \leq B_2$ , under event  $E_{\omega_k}$ ,  $\|A_k\| \leq \bar{L}_2 \bar{L}_{01} \sqrt{s} \stackrel{\text{def}}{=} L$  and

$$\|\mathbb{E}_{\bar{E}} [A_k A_k^*]\| = \|\mathbb{E}_{\bar{E}} [A_k^* A_k]\| = \left\| \mathbb{E}_{\bar{E}} [\mathbf{D}_2 [\varphi_{\omega_k}] (y)^* \mathbf{D}_2 [\varphi_{\omega_k}] (y) |q^\top \gamma(\omega_k)|^2] \right\| \leq \bar{L}_2^2 \mathbb{E}_{\bar{E}} [ |q^\top \gamma(\omega_k)|^2 ] \leq 2\bar{L}_2^2 \stackrel{\text{def}}{=} \sigma^2.$$

□

**Lemma C.6.** Assume that

$$\mathbb{P}(E_\omega^c) \leq \frac{t}{t + 6\sqrt{2s}} \quad \text{and} \quad \mathbb{E}[L_{01}(\omega)^2 \mathbf{1}_{E_\omega^c}] \leq \frac{t}{4\sqrt{2s}^{3/2}}$$

Let  $q \in \mathbb{C}^{s(d+1)}$ . Then, for all  $t \geq \frac{2\sqrt{2s}\bar{L}_{01}\bar{L}_1}{m} + \sqrt{\frac{8s^2\bar{L}_{01}^2\bar{L}_1^2}{m^2} + \frac{144s\bar{L}_1^2}{m}}$ , we have for each  $x_i \in X$ ,

$$\mathbb{P}_E \left( \left\| \mathbf{D}_1 \left[ q^\top (\mathbf{f}_X - \hat{\mathbf{f}}_X) \right] (x_i) \right\|_2 > 2t \|q\|_{\text{Block}} \right) \leq 28 \exp \left( -\frac{mt^2/(4s)}{2\bar{L}_1^2 + \sqrt{2t}\bar{L}_1\bar{L}_{01}/3} \right).$$

*Proof.* For each  $x_i \in X$ ,

$$\left\| \mathbf{D}_1 \left[ (\mathbb{E}_{\bar{E}} [q^\top \hat{\mathbf{f}}_X] - q^\top \mathbf{f}_X) \right] (x_i) \right\| \leq \|\Upsilon - \Upsilon_{\bar{E}}\| \|q\| \leq \frac{t}{\sqrt{2s}} \|q\|,$$

by Proposition C.1. For convenience, we drop the subscript  $X$  from  $\mathbf{f}_X$ . Fix  $i \in \{1, \dots, s\}$ . Observe that

$$\begin{aligned} \mathbb{P}_E \left( \left\| \mathbf{D}_1 \left[ q^\top (\mathbf{f} - \hat{\mathbf{f}}) \right] (x_i) \right\|_2 > 2t \|q\|_{\text{Block}} \right) &\leq \mathbb{P}_E \left( \left\| \mathbf{D}_1 \left[ q^\top (\mathbf{f} - \hat{\mathbf{f}}) \right] (x_i) \right\|_2 > \frac{2t}{\sqrt{2s}} \|q\|_2 \right) \\ &\leq \mathbb{P}_E \left( \left\| \mathbf{D}_1 \left[ q^\top (\mathbb{E}_{\bar{E}}[\hat{\mathbf{f}}] - \hat{\mathbf{f}}) \right] (x_i) \right\|_2 > \frac{t}{\sqrt{2s}} \|q\|_2 \right) \end{aligned}$$

The claim of this lemma follows by applying Lemma G.3: Let

$$Y_k = \mathbf{D}_1 [\varphi_{\omega_k}] (x_i) \gamma(\omega_k)^\top q - \mathbb{E}_{\bar{E}} \mathbf{D}_1 [\varphi_{\omega_k}] (x_i) \gamma(\omega)^\top q \in \mathbb{C}^d,$$

and observe that  $\mathbf{D}_1 \left[ q^\top (\hat{\mathbf{f}} - \mathbb{E}_{\bar{E}}[\hat{\mathbf{f}}]) \right] (x_i) = \frac{1}{m} \sum_k Y_k$ . Without loss of generality, assume that  $\|q\|_2 = 1$ . We apply Lemma G.3. Observe that conditional on event  $E$ ,

- $\|Y_k\|_2 \leq 2 \|q\|_2 \|\gamma(\omega_k)\|_2 \|\mathbf{D}_1 [\varphi_{\omega_k}] (x_i)\|_2 \leq 2\sqrt{s} \bar{L}_{01} \bar{L}_1$ .
- $\mathbb{E}_E \|Y_k\|^2 \leq \mathbb{E}_E [|\gamma(\omega_k)^\top q|^2 \mathbf{D}_1 [\varphi_{\omega_k}] (x_i) \mathbf{D}_1 [\varphi_{\omega_k}] (x_i)^\top] \leq \bar{L}_1^2 \|\Upsilon_E\|$ . So,  $\sigma^2 \leq m \bar{L}_1^2 \|\Upsilon_E\| \leq m \bar{L}_1^2 (t + \|\Upsilon\|) \leq m \bar{L}_1^2 (t/2 + 3/2) \leq 2m \bar{L}_1^2$  (here we are talking about the  $\sigma^2$  in Lemma G.3).

Therefore, for all

$$\begin{aligned} t &\geq \frac{2\sqrt{2s} \bar{L}_{01} \bar{L}_1}{m} + \sqrt{\frac{8s^2 \bar{L}_{01}^2 \bar{L}_1^2}{m^2} + \frac{144s \bar{L}_1^2}{m}} \\ \mathbb{P} \left( \left\| \frac{1}{m} \sum_{k=1}^m Y_k \right\|_2 \geq \frac{t}{\sqrt{2s}} \right) &\leq 28 \exp \left( -\frac{mt^2/(4s)}{2\bar{L}_1^2 + \sqrt{2t} \bar{L}_1 \bar{L}_{01}/3} \right) \end{aligned}$$

□

**Proposition C.3** (Block norm bound on  $\hat{\Upsilon}$  applied to a fixed vector). *Suppose that*

$$\mathbb{P}(E_\omega^c) \leq \frac{t}{t + 6\sqrt{s}(B_0 + 1)} \quad \text{and} \quad \mathbb{E}[L_{01}(\omega)^2 \mathbf{1}_{E^c}] \leq \frac{t}{4s^{3/2}(1 + 4B_0)}$$

Then, for all

$$t \geq \left( \frac{4\sqrt{2s} \bar{L}_{01} \bar{L}_1}{m} + \sqrt{\frac{32s^2 \bar{L}_{01}^2 \bar{L}_1^2}{m^2} + \frac{576s \bar{L}_1^2}{m}} \right)$$

we have

$$\mathbb{P}_E \left( \left\| (\Upsilon - \hat{\Upsilon})q \right\|_{\text{Block}} \geq t \|q\|_{\text{Block}} \right) \leq 32s \exp \left( -\frac{mt^2}{s(32\bar{L}_1^2 + 34t\bar{L}_1\bar{L}_{01})} \right). \quad (\text{C.8})$$

*Proof.* Let  $S_0 \stackrel{\text{def}}{=} \{1, \dots, s\}$  and  $S_j \stackrel{\text{def}}{=} \{s + (j-1)d + 1, \dots, s + jd\}$  for  $j = 1, \dots, s$ . Observe that by the union bound

$$\begin{aligned} \mathbb{P}_E \left( \left\| (\Upsilon - \hat{\Upsilon})q \right\|_{\text{Block}} \geq t \|q\|_{\text{Block}} \right) &\leq \mathbb{P}_E \left( \left\| ((\Upsilon - \hat{\Upsilon})q)_{S_0} \right\|_\infty \geq t \|q\|_{\text{Block}} \right) + \sum_{j=1}^s \mathbb{P}_E \left( \left\| ((\Upsilon - \hat{\Upsilon})q)_{S_j} \right\|_2 \geq t \|q\|_{\text{Block}} \right) \\ &\leq \sum_{j=1}^s \mathbb{P}_E \left( \left\| ((\Upsilon - \hat{\Upsilon})q)_j \right\| \geq t \|q\|_{\text{Block}} \right) + \sum_{j=1}^s \mathbb{P}_E \left( \left\| ((\Upsilon - \hat{\Upsilon})q)_{S_j} \right\|_2 \geq t \|q\|_{\text{Block}} \right). \end{aligned} \quad (\text{C.9})$$

To bound the first sum, observe that  $((\Upsilon - \hat{\Upsilon})q)_j = (\mathbf{f}(x_j) - \hat{\mathbf{f}}(x_j))^\top q$  and  $((\Upsilon - \hat{\Upsilon})q)_{S_j} = \mathbf{D}_1 \left[ q^\top (\mathbf{f} - \hat{\mathbf{f}}) \right] (x_j)$ . So, the first sum can be bounded by applying Proposition C.2. The second sum can be bounded by applying Lemma C.6.

□

**Norm bounds for  $\hat{\mathbf{f}}$**  We will repeatedly make use of the following result on  $\hat{\mathbf{f}}_X$ . This result is due to concentration bounds on the kernel  $\hat{K}$  which are derived subsequently.

**Proposition C.4** (Bound on  $\hat{\mathbf{f}}_X$ ). *Let  $X \in \mathcal{X}^s$ . Let  $\rho > 0$ . Assume that for all  $(i, j) \in \{(0, 0), (1, 0), (0, 2), (1, 2)\}$ ,*

$$\mathbb{P}(E_\omega^c) \leq \frac{t}{t + 4\sqrt{s} \max\{B_0, B_2\}}, \quad \mathbb{E}[L_i(\omega)L_j(\omega)\mathbf{1}_{E_\omega^c}] \leq \frac{t}{4\sqrt{s}}$$

Then, given any  $y \in \mathcal{X}$ ,

$$\mathbb{P}_{\bar{E}} \left( \left\| \hat{\mathbf{f}}_X(y) - \mathbf{f}_X(y) \right\| \geq t \right) \leq 4sd \exp \left( -\frac{mt^2/8}{3s\bar{L}_{01}^2} \right). \quad (\text{C.10})$$

and given any  $y \in \mathcal{X}^{\text{near}}$ , writing  $\hat{\mathbf{f}}_X = (\hat{f}_j)_{j=1}^p$  and  $\mathbf{f}_X = (f_j)_{j=1}^p$  with  $p = s(d+1)$ , we have

$$\mathbb{P}_{\bar{E}} \left( \sup_{\|q\|=1} \sqrt{\sum_{j=1}^p \left\| \mathbf{D}_2 [\hat{f}_j - f_j](y)q \right\|^2} > t \right) \leq s(3d + d^2) \exp \left( -\frac{mt^2/8}{s(\bar{L}_2^2 B_{11} + \bar{L}_1^2 B_{22} + \bar{L}_{01} \bar{L}_2)} \right). \quad (\text{C.11})$$

*Proof.* Let  $i, j \in \mathbb{N}_0$  with  $i + j \leq 2$ . Let  $[s] \stackrel{\text{def}}{=} \{1, \dots, s\}$  and  $I \stackrel{\text{def}}{=} \{(0, 0), (1, 0)\}$ , By Lemma C.7 and the union bound,

$$\mathbb{P}_{\bar{E}} \left( \exists (i, j) \in I, \exists \ell \in [s], \left\| \hat{K}^{(ij)}(x_\ell, y) - K^{(ij)}(x_\ell, y) \right\| \geq \frac{t}{\sqrt{s}} \right) \leq 4sd \exp \left( -\frac{mt^2/4}{3s\bar{L}_{01}^2} \right). \quad (\text{C.12})$$

So, (C.10) follows because

$$\left\| \hat{\mathbf{f}}_X(y) - \mathbf{f}_X(y) \right\| \leq \sqrt{\sum_{i=1}^s \left| \hat{K}(x_i, y) - K(x_i, y) \right|^2 + \left\| \hat{K}^{(10)}(x_i, y) - K^{(10)}(x_i, y) \right\|^2} \leq \sqrt{2}t.$$

By Lemma C.7, Lemma C.9 and the union bound, letting  $I_2 \stackrel{\text{def}}{=} \{(0, 2), (1, 2)\}$ , we have

$$\begin{aligned} \mathbb{P}_{\bar{E}} \left( \exists (i, j) \in I_2, \exists \ell \in [s], \left\| \hat{K}^{(ij)}(x_\ell, y) - K^{(ij)}(x_\ell, y) \right\| \geq \frac{t}{\sqrt{s}} \right) &\leq 2sd \exp \left( -\frac{mt^2/4}{2s(\bar{L}_2^2 + \bar{L}_0 \bar{L}_2)} \right) \\ &+ s(d + d^2) \exp \left( -\frac{mt^2/4}{s(\bar{L}_2^2 B_{11} + \bar{L}_1^2 B_{22} + \bar{L}_1 \bar{L}_2)} \right). \end{aligned} \quad (\text{C.13})$$

and (C.11) follows since given  $q \in \mathbb{C}^d$ ,  $\|q\| = 1$ , we have

$$\sum_{j=1}^p \left\| \mathbf{D}_2 [\hat{f}_j - f_j](y)q \right\|^2 \leq \sum_{j=1}^s \left( \left\| \hat{K}^{(02)}(x_j, y) - K^{(02)}(x_j, y) \right\|^2 + \left\| \hat{K}^{(12)}(x_j, y) - K^{(12)}(x_j, y) \right\|^2 \right) \leq 2t^2$$

□

**Lemma C.7** (Concentration on kernel). *Let  $t > 0$ ,  $x, x' \in \mathcal{X}$ . Let  $i, j \in \mathbb{N}_0$  with  $i + j \leq 2$ . Assume*

$$\mathbb{P}(E_\omega^c) \leq \frac{t}{t + 4\|K^{(ij)}(x, x')\|}, \quad \mathbb{E}[L_i(\omega)L_j(\omega)\mathbf{1}_{E_\omega^c}] \leq \frac{t}{4}$$

then

$$\mathbb{P}_{\bar{E}} \left( \left\| \hat{K}^{(ij)}(x, x') - K^{(ij)}(x, x') \right\| \geq t \right) \leq 2d \exp \left( -\frac{mt^2}{\bar{L}_p^2(b_{ij} + 1) + \bar{L}_i \bar{L}_j t/3} \right)$$

where  $p = \max(i, j)$  and  $b_{ij} = 1$  if  $\min(i, j) = 0$  and  $b_{ij} \stackrel{\text{def}}{=} \|K^{(11)}(x, x')\|$  otherwise.

*Proof.* It is an immediate application of Lemma C.5 with  $A_k = \text{Re} \left( \overline{\mathbf{D}_i [\varphi_{\omega_k}]}(x) \mathbf{D}_j [\varphi_{\omega_k}](x')^\top \right)$  for  $k = 1, \dots, m$ . Note that  $A_k \in (\mathbb{R}^d)^{i+j}$  if  $(i, j) \in \{(0, 0), (0, 1), (1, 0)\}$  and  $A_k \in \mathbb{R}^{d \times d}$  if  $\max(i, j) = 2$ . noting that under  $\bar{E}$ ,  $\|A_k\| \leq \bar{L}_i \bar{L}_j$ . Next, we need to bound  $\|\mathbb{E}_{\bar{E}}[A_k A_k^*]\|$  and  $\|\mathbb{E}_{\bar{E}}[A_k^* A_k]\|$ . We present only the argument for  $(i, j) = (0, 2)$ , since all the other cases are similar:

$$\begin{aligned} 0 &\preceq \mathbb{E}_{\bar{E}} A_k A_k^* \preceq \mathbb{E}_{\bar{E}} [\|\varphi_{\omega_k}(x')\|^2 \mathbf{D}_2 [\varphi_{\omega_k}](x) \mathbf{D}_2 [\varphi_{\omega_k}](x)^*] \\ &\preceq \bar{L}_2^2 \mathbb{E}_{\bar{E}} \|\varphi_{\omega_k}(x')\|^2 \text{Id} = \bar{L}_2^2 |K_{\bar{E}}(x', x')| \text{Id} \preceq (1 + t/2) \bar{L}_2^2 \text{Id} \end{aligned}$$

so  $\|\mathbb{E}_{\bar{E}} A_k A_k^*\| \leq (1 + t/2) \bar{L}_2^2$ . Similarly,  $\|\mathbb{E}_{\bar{E}} A_k^* A_k\| \leq (1 + t/2) \bar{L}_2^2$  and

$$\|\mathbb{E}_{\bar{E}} A_k^* A_k\|, \|\mathbb{E}_{\bar{E}} A_k A_k^*\| \leq L_p^2 (B_{qq} + t/2)$$

where  $p = \max(i, j)$  and  $q = \min(i, j)$ . □

Applying a grid on  $\mathcal{X}^{\text{near}}$ , we get a uniform version.

**Lemma C.8.** *Let  $i, j \in \mathbb{N}_0$  with  $i + j \leq 2$ , and assume that*

$$\mathbb{P}(E_\omega^c) \leq \frac{t}{t + 16B_{ij}}, \quad \mathbb{E}[L_i(\omega)L_j(\omega)\mathbf{1}_{E_\omega^c}] \leq \frac{t}{16}.$$

*Then*

$$\begin{aligned} \mathbb{P}_{\bar{E}} \left( \exists x, x' \in \mathcal{X}^{\text{near}}, \left\| \hat{K}^{(ij)}(x, x') - K^{(ij)}(x, x') \right\| \geq t \right) \\ \leq 2ds^2 \exp \left( -\frac{mt^2/16}{L_p^2(B_{qq} + 1) + \bar{L}_i \bar{L}_j t/12} + 2d \log \left( \frac{4(\mathcal{L}_i \bar{L}_j + \bar{L}_i \mathcal{L}_j)}{t} \right) \right). \end{aligned}$$

where  $p = \max(i, j)$  and  $q = \min(i, j)$  and  $\mathcal{L}_i, \mathcal{L}_j$  are as in Lemma C.2

*Proof.* We define a  $\delta$ -covering of  $\mathcal{X}^{\text{near}}$  for the metric  $d_{\mathbf{H}}$  with  $\delta = \min \left( r_{\text{near}}, \frac{t}{4(\mathcal{L}_i \bar{L}_j + \bar{L}_i \mathcal{L}_j)} \right)$  of size  $s \left( \frac{r_{\text{near}}}{\delta} \right)^d$ .

Let this covering be denoted by  $\mathcal{X}^{\text{grid}}$ .

By the union bound and Lemma C.7,

$$\mathbb{P}_{\bar{E}} \left( \exists x, x' \in \mathcal{X}^{\text{grid}} \text{ s.t. } \left\| \hat{K}^{(ij)}(x, x') - K^{(ij)}(x, x') \right\| \geq t/4 \right) \leq 2ds^2 \left( \frac{r_{\text{near}}}{\delta} \right)^{2d} \exp \left( -\frac{mt^2/16}{L_p^2(B_{qq} + 1) + \bar{L}_i \bar{L}_j t/12} \right)$$

where  $p = \max(i, j)$  and  $q = \min(i, j)$ . This gives the required upper bound: Given any  $x, x' \in \mathcal{X}$ , let  $x_{\text{grid}}, x'_{\text{grid}} \in \mathcal{X}^{\text{grid}}$  be such that  $d_{\mathbf{H}}(x, x_{\text{grid}}), d_{\mathbf{H}}(x', x'_{\text{grid}}) \leq \delta$ . Then, under event  $\bar{E}$ , by Lemma C.2,

$$\left\| \hat{K}^{(ij)}(x, x') - \hat{K}^{(ij)}(x_{\text{grid}}, x'_{\text{grid}}) \right\| \leq (\mathcal{L}_i \bar{L}_j + \bar{L}_i \mathcal{L}_j) \delta \leq t/4.$$

By Jensen's inequality and since  $\left\| K_{\bar{E}}^{(ij)}(x, x') - K^{(ij)}(x, x') \right\| \leq t/4$  for all  $x, x'$ , we have

$$\left\| K^{(ij)}(x, x') - K^{(ij)}(x_{\text{grid}}, x'_{\text{grid}}) \right\| \leq t/2. \quad \square$$

We now derive analogous results for the kernel differentiated 3 times.

**Lemma C.9** (Concentration on order 3 kernel). *Let  $x, x' \in \mathcal{X}^{\text{near}}$ . Assume that*

$$\mathbb{P}(E_\omega^c) \leq \frac{t}{t + 4 \max\{B_{12}, B_{22}\}}, \quad \mathbb{E}[(L_1(\omega)L_2(\omega) + L_2^2(\omega))\mathbf{1}_{E_\omega^c}] \leq \frac{t}{4}$$

For  $j = 1, \dots, m$ , let  $a_i = (\mathbf{D}_1[\overline{\varphi_{\omega_j}}](x))_i \in \mathbb{C}$ ,  $D \stackrel{\text{def.}}{=} \mathbf{D}_2[\varphi_\omega](x') \in \mathbb{C}^{d \times d}$  and

$$A_j \stackrel{\text{def.}}{=} (a_1 D \quad a_2 D \quad \dots \quad a_d D)^\top \in \mathbb{C}^{d^2 \times d} \quad (\text{C.14})$$

Let  $Z \stackrel{\text{def.}}{=} \frac{1}{m} \sum_{j=1}^m (A_j - \mathbb{E}[A_j])$ . Then, given

$$\begin{aligned} g(x') &\stackrel{\text{def.}}{=} (g_i(x'))_{i=1}^d \stackrel{\text{def.}}{=} \sum_{k=1}^m \left( \overline{\mathbf{D}_1[\varphi_{\omega_k}](x)} \varphi_{\omega_k}(x') - \mathbb{E}[\overline{\mathbf{D}_1[\varphi_{\omega_k}](x)} \varphi_{\omega_k}(x')] \right) \\ &= \hat{K}^{(10)}(x, x') - K^{(10)}(x, x'), \end{aligned}$$

$$(i) \sup_{q \in \mathbb{C}^d, \|q\| \leq 1} \sum_{i=1}^d \|\mathbf{D}_2[g_i](x')q\|^2 = \|Z\|^2,$$

$$(ii) \sup_{q \in \mathbb{C}^d, \|q\| \leq 1} \|\mathbf{D}_2[q^\top g](x')\| = \left\| \hat{K}^{(12)}(x, x') - K^{(12)}(x, x') \right\| \leq \|Z\|.$$

and

$$\mathbb{P}_{\bar{E}}(\|Z\| \geq t) \leq (d + d^2) \exp\left(-\frac{mt^2/4}{\bar{B} + \bar{L}_1 \bar{L}_2 t/3}\right)$$

where  $\bar{B} \stackrel{\text{def.}}{=} \max\{\bar{L}_2^2(B_{11} + t/2), \bar{L}_1^2(B_{22} + t/2)\}$ .

*Proof.* The claim (i) is simply by definition, since  $Zq = (\mathbf{D}_2[g_i](x')q)_{i=1}^d \in \mathbb{C}^{d^2}$ . For (ii), the first equality is simply by definition, and for the inequality, observe that

$$\begin{aligned} \sup_{q \in \mathbb{C}^d, \|q\| \leq 1} \|\mathbf{D}_2[q^\top g](x')\| &= \sup_{q \in \mathbb{C}^d, \|q\| \leq 1} \sup_{p \in \mathbb{C}^d, \|p\| \leq 1} \left\| \sum_{i=1}^d q_i \mathbf{D}_2[g_i](x')p \right\| \\ &\leq \sup_{q \in \mathbb{C}^d, \|q\| \leq 1} \sup_{p \in \mathbb{C}^d, \|p\| \leq 1} \|q\| \sqrt{\sum_{i=1}^d \|\mathbf{D}_2[g_i](x')p\|^2} \leq \|Z\|. \end{aligned}$$

Finally, the probability bound follows by applying Lemma C.5: First note that under  $\bar{E}$ ,  $\|A_j\| \leq \bar{L}_1 \bar{L}_2$ . It remains to bound  $\|\mathbb{E}_{\bar{E}}[A_j^* A_j]\|$  and  $\|\mathbb{E}_{\bar{E}}[A_j A_j^*]\|$ :

$$\begin{aligned} \sup_{\|q\| \leq 1} \mathbb{E}_{\bar{E}} \langle A_j^* A_j q, q \rangle &= \sup_{\|q\| \leq 1} \mathbb{E}_E \sum_{i=1}^d |(\mathbf{D}_1[\varphi_{\omega_j}](x))_i|^2 \|\mathbf{D}_2[\varphi_\omega](x')q\|^2 \\ &\leq \sup_{\|q_k\| \leq 1} \bar{L}_1^2 \mathbb{E}_{\bar{E}} \overline{\mathbf{D}_2[\varphi_\omega](x')[q_1, q_2]} \mathbf{D}_2[\varphi_\omega](x')[q_3, q_4] \\ &\leq \bar{L}_1^2 \left\| K_E^{(22)}(x, x) \right\| \leq \bar{L}_1^2 (B_{22} + t/2). \end{aligned}$$

Given  $p_i \in \mathbb{C}^d$  for  $i = 1, \dots, d$  such that  $\sum_i \|p_i\|^2 \leq 1$ , write  $P = (p_1 \quad p_2 \quad \dots \quad p_d) \in \mathbb{C}^{d \times d}$  and  $\bar{p} =$



$(p_1^\top \quad p_2^\top \quad \cdots \quad p_d^\top)^\top \in \mathbb{C}^{d^2}$ . Then,

$$\begin{aligned}
\mathbb{E}_E \langle A_j A_j^* \bar{p}, \bar{p} \rangle &= \mathbb{E}_E \left\| \sum_{i=1}^d (\mathbf{D}_1 [\varphi_{\omega_j}](x))_i \mathbf{D}_2 [\varphi_{\omega_j}](x') p_i \right\|^2 \\
&= \mathbb{E}_E \left\| \mathbf{D}_2 [\varphi_{\omega_j}](x') P \mathbf{D}_1 [\varphi_{\omega_j}](x) \right\|^2 \\
&\leq \bar{L}_2^2 \mathbb{E}_E \sum_i \left| \sum_k p_{i,k} (\mathbf{D}_1 [\varphi_{\omega_j}](x))_k \right|^2 \\
&= \bar{L}_2^2 \sum_i \langle \hat{K}_{\bar{E}}^{(11)}(x, x) p_i, p_i \rangle \leq \bar{L}_2^2 \left\| \hat{K}_{\bar{E}}^{(11)}(x, x) \right\|^2 \sum_i \|p_i\|^2 \leq \bar{L}_2^2 (B_{11} + t/2).
\end{aligned}$$

□

**Lemma C.10** (Uniform concentration on order 3 kernel). *Assume*

$$\mathbb{P}(E_\omega^c) \leq \frac{t}{t + 16 \max\{B_{12}, B_{22}\}}, \quad \mathbb{E}[L_1(\omega) L_2(\omega) \mathbf{1}_{E_\omega^c}] \leq \frac{t}{16}$$

then

$$\begin{aligned}
\mathbb{P}_{\bar{E}} \left( \exists x, x' \in \mathcal{X}^{\text{near}}, \left\| \hat{K}^{(12)}(x, x') - K^{(12)}(x, x') \right\| \geq t \right) \\
\leq s^2 (d + d^2) \exp \left( -\frac{mt^2/16}{\tilde{B} + \bar{L}_1 \bar{L}_2 t/6} + 2d \log \left( \frac{8(\mathcal{L}_1 \bar{L}_2 + \bar{L}_2 \mathcal{L}_2)}{t} \right) \right)
\end{aligned}$$

where  $\tilde{B} \stackrel{\text{def}}{=} \max\{\bar{L}_2^2 (B_{11} + t/2), \bar{L}_1^2 (B_{22} + t/2)\}$ ,  $\mathcal{L}_1, \mathcal{L}_2$  are as in Lemma C.2.

*Proof.* Let  $\mathcal{X}^{\text{grid}}$  be a  $\delta$ -covering of  $\mathcal{X}^{\text{near}}$  for the metric  $d_{\mathbf{H}}$  with  $\delta = \min \left( r_{\text{near}}, \frac{t}{8(\mathcal{L}_1 \bar{L}_2 + \mathcal{L}_2 \bar{L}_2)} \right)$  of size at most  $s \left( \frac{8(\mathcal{L}_1 \bar{L}_2 + \mathcal{L}_2 \bar{L}_2)}{t} \right)^d$ . By Lemma C.9 and the union bound,

$$\begin{aligned}
\mathbb{P}_{\bar{E}} \left( \exists x, x' \in \mathcal{X}^{\text{grid}}, \left\| \hat{K}^{(ij)}(x, x') - K^{(ij)}(x, x') \right\| \geq t/2 \right) \\
\leq s^2 (d + d^2) \left( \frac{8(\bar{L}_1 \bar{L}_2 + \bar{L}_2^2)}{t} \right)^{2d} \exp \left( -\frac{mt^2/16}{\bar{L}_2^2 (B_{11} + t/4) + \bar{L}_1 \bar{L}_2 t/6} \right) \stackrel{\text{def}}{=} \rho.
\end{aligned}$$

Moreover, under event  $\bar{E}$ , given any  $x, x' \in \mathcal{X}^{\text{near}}$ , there exists grid points  $x_{\text{grid}}, x'_{\text{grid}}$  such that

$$d_{\mathbf{H}}(x, x_{\text{grid}}), d_{\mathbf{H}}(x', x'_{\text{grid}}) \leq \delta$$

and

$$\begin{aligned}
\left\| \left( \hat{K}^{(12)}(x, x') - K^{(12)}(x, x') \right) \right\| &\leq \left\| \left( \hat{K}^{(12)}(x_{\text{grid}}, x'_{\text{grid}}) - K^{(12)}(x_{\text{grid}}, x'_{\text{grid}}) \right) \right\| \\
&\quad + \left\| \left( \hat{K}^{(12)}(x, x') - \hat{K}^{(12)}(x_{\text{grid}}, x'_{\text{grid}}) \right) \right\| \\
&\quad + \left\| \left( K^{(12)}(x, x') - K^{(12)}(x_{\text{grid}}, x'_{\text{grid}}) \right) \right\|,
\end{aligned}$$

and by Lemma C.2, under event  $\bar{E}$ ,

$$\left\| \left( \hat{K}^{(12)}(x, x') - \hat{K}^{(12)}(x_{\text{grid}}, x'_{\text{grid}}) \right) \right\| \leq (\mathcal{L}_1 \bar{L}_2 + \mathcal{L}_2 \bar{L}_2) \delta \leq t/8.$$

and by Jensen's inequality and since  $\|K^{(12)}(x, y) - K_{\bar{E}}^{(12)}(x, y)\| \leq t/8$ ,

$$\left\| \left( K^{(12)}(x, y) - K^{(12)}(x_{\text{grid}}, y) \right) \right\| \leq 3t/8.$$

Therefore, conditional on  $\bar{E}$ ,  $\left\| \left( \hat{K}^{(12)}(x, y) - K^{(12)}(x, y) \right) \right\| < t$  with probability at least  $1 - \rho$ .  $\square$

## D Proof of Theorem 3

In all the rest of the proofs we fix  $X_0 \in \mathcal{X}^s$  to be  $\Delta$ -separated points,  $a_0 \in \mathbb{C}^s$ , and let  $\mathbf{u} = (\text{sign}(a_0), 0_{sd})$ . We denote  $\mathcal{X}_i^{\text{near}} = \{x \in \mathcal{X} ; d_{\mathbf{H}}(x, x_{0,i}) \leq r_{\text{near}}\}$  and  $\mathcal{X}^{\text{near}} = \cup_i \mathcal{X}_i^{\text{near}}$  and  $\mathcal{X}^{\text{far}} = \mathcal{X} \setminus \mathcal{X}^{\text{near}}$ .

Since  $K$  is an admissible kernel, from (B.2) and (B.1) in the proof of Theorem 2,  $\eta_{X_0, a_0}$  satisfies

- (i) for all  $y \in \mathcal{X}^{\text{far}}$ ,  $|\eta_{X_0, a_0}(y)| \leq 1 - \frac{1}{2}\varepsilon_0$ ,
- (ii) for all  $y \in \mathcal{X}^{\text{near}}(i)$ ,  $-\text{Re}(\text{sign}(a_i)\mathbf{D}_2[\eta_{X_0, a_0}](y)) \gtrsim \frac{1}{2}\varepsilon_2\text{Id}$  and  $\|\text{Im}(\text{sign}(a_i)\mathbf{D}_2[\eta_{X_0, a_0}](y))\| \leq \left(\frac{p}{2}\right)^{\frac{1}{2}}\varepsilon_2$ .

$$p \stackrel{\text{def.}}{=} \sqrt{(1 - \varepsilon_2 r_{\text{near}}^2/2)/(\varepsilon_2 r_{\text{near}}^2/2)} \geq 1,$$

since  $\varepsilon_2 r_{\text{near}}^2 \leq 1$  by assumption of  $K$  being admissible. We aim to show that, for  $X$  close to  $X_0$ ,  $\hat{\eta}_X$  is nondegenerate by showing that  $\|\mathbf{D}_r[\hat{\eta}_X] - \mathbf{D}_r[\eta_{X_0, a_0}]\| \leq c\varepsilon_r$  for some positive constant  $c$  sufficiently small.

### D.1 Nondegeneracy of $\hat{\eta}_{X_0, a_0}$

We first establish the nondegeneracy of  $\hat{\eta}_{X_0, a_0}$ , our proof can be seen as a generalisation of the techniques in [9] to the multidimensional setting with general sampling operators:

**Theorem D.1.** *Let  $\rho > 0$  and assume that the assumptions in Section 2.3 hold. Assume also that either (a) or (b) holds:*

- (a)  $\text{sign}(a_0)$  is a Steinhaus sequence and

$$m \gtrsim C \cdot s \cdot \log\left(\frac{N^d}{\rho}\right) \log\left(\frac{s}{\rho}\right)$$

- (b)  $\text{sign}(a_0)$  is an arbitrary sequence from the complex unit circle, and

$$m \gtrsim C \cdot s^{3/2} \cdot \log\left(\frac{N^d}{\rho}\right)$$

where  $C, N$  are defined in the main paper. Then with probability at least  $1 - \rho$ , the following hold: For all  $y \in \mathcal{X}^{\text{far}}$ ,  $|\hat{\eta}_{X_0, a_0}(y)| \leq 1 - \frac{7}{16}\varepsilon_0$ , and for all  $y \in \mathcal{X}^{\text{near}}(i)$ ,  $-\text{Re}(\text{sign}(a_i)\mathbf{D}_2[\hat{\eta}_{X_0, a_0}](y)) \gtrsim \frac{7}{16}\varepsilon_2\text{Id}$  and  $\|\text{Im}(\text{sign}(a_i)\mathbf{D}_2[\hat{\eta}_{X_0, a_0}](y))\| \leq \left(\frac{p}{2} + \frac{p}{8}\right)^{\frac{1}{2}}\varepsilon_2$  and hence,  $\hat{\eta}_{X_0, a_0}$  is  $(\frac{7}{16}\varepsilon_0, \frac{7}{16}\varepsilon_2)$ -nondegenerate.

*Proof.* Note that

$$\frac{8}{7} \left( \frac{p}{2} + \frac{p}{8} \right) = \frac{5}{7} p < \sqrt{\frac{1 - 7\varepsilon_2 r_{\text{near}}^2/16}{7\varepsilon_2 r_{\text{near}}^2/16}}$$

so  $\hat{\eta}_{X_0, a_0}$  is  $(\frac{7}{16}\varepsilon_0, \frac{7}{16}\varepsilon_2)$ -nondegenerate by Lemma B.1

Let  $c \stackrel{\text{def.}}{=} 1/32$ . Observe that by assumption and Lemma C.4,  $\mathbb{P}(\bar{E}) \leq \rho/2$ . Therefore, it is sufficient to prove that conditional on  $\bar{E}$ , with probability at least  $1 - \delta$  with  $\delta \stackrel{\text{def.}}{=} \rho/2$ ,  $\hat{\eta}_{X_0, a_0}$  is nondegenerate.

We will repeatedly use the fact that our assumptions (by Lemma C.4) also imply that

$$\mathbb{P}(E_\omega^c) \leq \frac{\varepsilon}{m}, \quad \mathbb{E}[L_i(\omega)L_j(\omega)\mathbf{1}_{E_\omega^c}] \leq \frac{\varepsilon}{m}$$

for all  $(i, j) \in \{(0, 0), (1, 0), (0, 2), (1, 2)\}$ ,

**Step I: Proving nondegeneracy on a finite grid.**

Let  $\mathcal{X}_{\text{grid}}^{\text{far}} \subset \mathcal{X}^{\text{far}}$  and  $\mathcal{X}_{\text{grid}}^{\text{near}} \subset \mathcal{X}^{\text{near}}$ , be finite point sets. Let

$$Q_r(y) \stackrel{\text{def}}{=} \|\mathbf{D}_r [\hat{\eta}_{X_0, a_0}](y) - \mathbf{D}_r [\eta_{X_0, a_0}](y)\|, \quad r = 0, 2.$$

We first prove that conditional on  $\bar{E}$ , with probability at least  $1 - \delta$  where  $\delta \stackrel{\text{def}}{=} \rho/2$ , that  $Q_0(y) \leq c\varepsilon_0$  for all  $y \in \mathcal{X}_{\text{grid}}^{\text{far}}$  and  $Q_2(y) \leq c\varepsilon_2$  for all  $y \in \mathcal{X}_{\text{grid}}^{\text{far}}$ .

Let us first recall some facts which were proven in the previous section: Let  $a, t \in (0, 1)$  and write  $\mathbf{f} = (\bar{f}_j)_{j=1}^{s(d+1)}$  and  $\hat{\mathbf{f}} = (\hat{f}_j)_{j=1}^{s(d+1)}$ . Let  $q_0 \stackrel{\text{def}}{=} \Upsilon^{-1}\mathbf{u}$ , so  $\|q_0\| \leq 2\sqrt{s}$ . Let  $F$  be the event that

- (a)  $\|\Upsilon^{-1} - \hat{\Upsilon}^{-1}\| \leq t$ ,
- (b)  $\forall y \in \mathcal{X}_{\text{grid}}^{\text{far}}, \|\hat{\mathbf{f}}_{X_0}(y) - \mathbf{f}_{X_0}(y)\| \leq a\varepsilon_0$ ,
- (c)  $\forall y \in \mathcal{X}_{\text{grid}}^{\text{near}}, \sup_{q \in \mathbb{C}^d, \|q\|=1} \sqrt{\sum_{j=1}^p \|\mathbf{D}_2 [f_j - \bar{f}_j](y)q\|^2} \leq a\varepsilon_2$ ,

Let  $G$  be the event that

- (d)  $\forall y \in \mathcal{X}_{\text{grid}}^{\text{far}}, |(\hat{\mathbf{f}}_{X_0}(y) - \mathbf{f}_{X_0}(y))^\top q_0| \leq 2a\varepsilon_0$
- (e)  $\forall y \in \mathcal{X}_{\text{grid}}^{\text{near}}, \|\mathbf{D}_2 [(\hat{\mathbf{f}}_{X_0} - \mathbf{f}_{X_0})^\top q_0](y)\| \leq 2a\varepsilon_2$

then provided that

$$\mathbb{P}(E_\omega^c) \leq \frac{u}{u + \max\{4\sqrt{s}B_{ij}, 6\}}, \quad \mathbb{E}[L_i(\omega)L_j(\omega)\mathbf{1}_{E_\omega^c}] \leq \frac{u}{4s} \quad (\text{D.1})$$

where  $u = \min\{a\varepsilon_i, t\}$ , we have

$$\begin{aligned} \mathbb{P}_{\bar{E}}(F^c) &\leq 4(d+1)s \exp\left(-\frac{mt^2}{16s\bar{L}_{01}^2(3+2t)}\right) \\ &\quad + 4sd |\mathcal{X}_{\text{grid}}^{\text{far}}| \exp\left(-\frac{m(a\varepsilon_0)^2/8}{s(\bar{L}_{01}^2(B_{11}+1) + \bar{L}_{01}^2)}\right) \\ &\quad + s(3d+d^2) |\mathcal{X}_{\text{grid}}^{\text{near}}| \exp\left(-\frac{m(a\varepsilon_2)^2/8}{s(\bar{L}_2^2 B_{11} + \bar{L}_1^2 B_{22}) + \bar{L}_{01}\bar{L}_2}\right) \\ \mathbb{P}_{\bar{E}}(G^c) &\leq 2 |\mathcal{X}_{\text{grid}}^{\text{far}}| \exp\left(-\frac{ma^2\varepsilon_0^2}{s(8\bar{L}_0^2 + \frac{4}{3}\bar{L}_0\bar{L}_{01}a\varepsilon_0)}\right) \\ &\quad + 2d |\mathcal{X}_{\text{grid}}^{\text{near}}| \exp\left(-\frac{ma^2\varepsilon_2^2}{s(8\bar{L}_2^2 + \frac{4}{3}\bar{L}_2\bar{L}_{01}a\varepsilon_2)}\right), \end{aligned} \quad (\text{D.2})$$

where for  $\mathbb{P}_{\bar{E}}(F^c)$ , the first term on the right is due to Proposition C.1, the second and third are due to Proposition C.4 while the bound on  $\mathbb{P}_{\bar{E}}(G^c)$  is due to Proposition C.2 (noting that, since this probability bound over the  $\omega_j$  is valid for all fixed  $\mathbf{u}$ , and the  $\omega_j$  and the signs are independent, it is valid with the same probability over both  $\omega_j$  and  $\mathbf{u}$ ).

Observe that

$$\begin{aligned} \|\mathbf{D}_j [\hat{\eta}_{X_0, a_0}] (y) - \mathbf{D}_j [\eta_{X_0, a_0}] (y)\| &= \left\| \mathbf{D}_j \left[ (\hat{\alpha}_{X_0} - \alpha_{X_0})^\top \hat{\mathbf{f}}_{X_0} \right] (y) + \mathbf{D}_j \left[ \alpha_{X_0}^\top (\hat{\mathbf{f}}_{X_0} - \mathbf{f}_{X_0}) \right] (y) \right\| \\ &\leq \left\| \mathbf{D}_j \left[ \mathbf{u}^\top \left( (\hat{\Upsilon}^{-1} - \Upsilon^{-1}) \hat{\mathbf{f}}_{X_0} + \Upsilon^{-1} (\hat{\mathbf{f}}_{X_0} - \mathbf{f}_{X_0}) \right) \right] (y) \right\| \end{aligned} \quad (\text{D.3})$$

**Step I (a): Random signs**

We first bound (D.3) in the case where  $\mathbf{u}$  is a Steinhaus sequence.

Let  $\beta_1(y) \stackrel{\text{def}}{=} (\hat{\Upsilon}^{-1} - \Upsilon^{-1}) \hat{\mathbf{f}}_{X_0}(y)$  and  $\beta_2(y) \stackrel{\text{def}}{=} \Upsilon^{-1} (\hat{\mathbf{f}}_{X_0}(y) - \mathbf{f}_{X_0}(y))$ . Then, event  $F$  implies that  $\|\beta_1(y)\| \leq t(B_0 + a\varepsilon_0)$  for all  $y \in \mathcal{X}_{\text{grid}}^{\text{far}}$ , and event  $G$  implies that  $|\mathbf{u}^\top \beta_2(y)| \leq 2a\varepsilon_0$ . So,

$$\begin{aligned} &\mathbb{P}_{\bar{E}} \left( |\exists y \in \mathcal{X}_{\text{grid}}^{\text{far}}, \mathbf{u}^\top (\beta_1 + \beta_2)(y)| > c\varepsilon_0 \right) \\ &\leq \mathbb{P}_{F \cap \bar{E}} \left( \exists y \in \mathcal{X}_{\text{grid}}^{\text{far}}, |\mathbf{u}^\top \beta_1(y)| > \frac{c}{2}\varepsilon_0 \right) \mathbb{P}_{\bar{E}}(F) + \mathbb{P}_{\bar{E}}(F^c) \\ &\quad + \mathbb{P}_{G \cap \bar{E}} \left( \exists y \in \mathcal{X}_{\text{grid}}^{\text{far}}, |\mathbf{u}^\top \beta_2(y)| > \frac{c}{2}\varepsilon_0 \right) \mathbb{P}_{\bar{E}}(G) + \mathbb{P}_{\bar{E}}(G^c) \\ &\leq \mathbb{P}_{F \cap \bar{E}} \left( \exists y \in \mathcal{X}_{\text{grid}}^{\text{far}}, |\mathbf{u}^\top \beta_1| > \frac{c}{2}\varepsilon_0 \right) + \mathbb{P}_{\bar{E}}(F^c) + \mathbb{P}_{\bar{E}}(G^c) \\ &\leq 4 \left| \mathcal{X}_{\text{grid}}^{\text{far}} \right| e^{-\frac{(c/4)^2 \varepsilon_0^2}{8t^2(B_0 + a\varepsilon_0)^2}} + \mathbb{P}_{\bar{E}}(F^c) + \mathbb{P}_{\bar{E}}(G^c). \end{aligned}$$

where we set  $a = c/4$  for the second inequality and the last inequality follows from Lemma G.4 and because  $\mathbf{u}$  consists of random signs.

Now consider  $Q_2(y) = \mathbf{D}_2 [\mathbf{u}^\top \beta] (y)$ . Under event  $G$ ,  $\|\mathbf{D}_2 [\mathbf{u}^\top \beta_2] (y)\| \leq \frac{c}{2}\varepsilon_2$ . Writing  $M = (\hat{\Upsilon}^{-1} - \Upsilon^{-1})$ , we have

$$\mathbf{D}_2 [\mathbf{u}^\top \beta_1] (y) = \mathbf{D}_2 \left[ \mathbf{u}^\top \left( M \hat{\mathbf{f}}_{X_0} \right) \right] (y) = \sum_{\ell=1}^p \mathbf{u}_\ell \left( \sum_{j=1}^p M_{\ell j} \mathbf{D}_2 [f_j] (y) \right). \quad (\text{D.4})$$

We aim to bound (D.4) by applying the Matrix Hoeffding's inequality (Corollary G.1): let

$$Y_\ell \stackrel{\text{def}}{=} \text{Re} \left( \sum_{j=1}^p M_{\ell j} \mathbf{D}_2 [f_j] (y) \right) \in \mathbb{R}^{d \times d}$$

which is a symmetric matrix. Note that

$$\left\| \sum_{\ell=1}^p Y_\ell^2 \right\| = \sup_{q \in \mathbb{R}^d, \|q\|=1} \sum_{\ell=1}^p \langle Y_\ell^2 q, q \rangle = \sup_{q \in \mathbb{R}^d, \|q\|=1} \sum_{\ell=1}^d \|Y_\ell q\|^2 \leq \sup_{q \in \mathbb{R}^d, \|q\|=1} \left\| \sum_{j=1}^p M_{\ell, j} (\mathbf{D}_2 [f_j] (y) q) \right\|^2.$$

Then, for a vector  $q$  of unit norm, let  $V_{j,n} \stackrel{\text{def}}{=} (\mathbf{D}_2 [f_j] (y) q)_n$  for  $j = 1, \dots, p$  and  $n = 1, \dots, d$ , then

$$\begin{aligned} \sum_{\ell=1}^p \left\| \sum_{j=1}^p M_{\ell, j} (\mathbf{D}_2 [f_j] (y) q) \right\|^2 &= \sum_{\ell=1}^p \sum_{n=1}^d \left| \sum_{j=1}^p M_{\ell, j} V_{j,n} \right|^2 = \sum_{n=1}^d \|M V_{\cdot, n}\|^2 \leq \|M\|^2 \sum_{n=1}^d \|V_{\cdot, n}\|^2 \\ &= \|M\|^2 \sum_{n=1}^d \sum_{j=1}^p |V_{j,n}|^2 = \|M\|^2 \sum_{j=1}^p \|\mathbf{D}_2 [f_j] (y) q\|^2. \end{aligned}$$

Under event  $F$ , we have  $\|M\|^2 \sum_{j=1}^p \|\mathbf{D}_2 [f_j] (y) q\|^2 \leq t^2 (B_2 + a\varepsilon_2)^2$ . Then,

$$\mathbb{P}_{F \cap \bar{E}} \left( \left\| \mathbf{D}_2 \left[ \mathbf{u}^\top \text{Re} \left( M \hat{\mathbf{f}}_{X_0} \right) \right] (y) \right\| \geq \frac{c\varepsilon_2}{\sqrt{2}} \right) \leq 2d \exp \left( -\frac{(c/2)^2 \varepsilon_2^2}{4t^2 (B_2 + a\varepsilon_2)^2} \right).$$

By repeating this argument for the imaginary part, we obtain

$$\mathbb{P}_{F \cap \bar{E}} \left( \left\| \mathbf{D}_2 \left[ \mathbf{u}^\top \text{Im} \left( M \hat{\mathbf{f}}_{X_0} \right) \right] (y) \right\| \geq \frac{c\varepsilon_2}{\sqrt{2}} \right) \leq 2d \exp \left( -\frac{(c/2)^2 \varepsilon_2^2}{4t^2 (B_2 + a\varepsilon_2)^2} \right).$$

So,

$$\begin{aligned} & \mathbb{P}_{\bar{E}} \left( \exists y \in \mathcal{X}_{\text{grid}}^{\text{near}}, \left\| \mathbf{D}_2 \left[ \mathbf{u}^\top \beta(y) \right] \right\| > c\varepsilon_2 \right) \\ & \leq \mathbb{P}_{F \cap \bar{E}} \left( \exists y \in \mathcal{X}_{\text{grid}}^{\text{near}}, \left\| \mathbf{D}_2 \left[ \mathbf{u}^\top \text{Re} \left( M \hat{\mathbf{f}}_{X_0} \right) \right] (y) \right\| \geq \frac{c}{2} \varepsilon_2 \right) + \mathbb{P}_{\bar{E}}(F^c) + \mathbb{P}_{\bar{E}}(G^c) \\ & \leq 4d |\mathcal{X}_{\text{grid}}^{\text{near}}| \exp \left( -\frac{(c/2)^2 \varepsilon_2^2}{4t^2 (B_2 + a\varepsilon_2)^2} \right) + \mathbb{P}_{\bar{E}}(F^c) + \mathbb{P}_{\bar{E}}(G^c). \end{aligned}$$

Therefore,

$$\begin{aligned} & 1 - \mathbb{P} \left( Q_0(y_0) \leq c\varepsilon_0 \text{ and } Q_2(y_2) \leq c\varepsilon_2, \forall y_0 \in \mathcal{X}_{\text{grid}}^{\text{far}}, \forall y_2 \in \mathcal{X}_{\text{grid}}^{\text{near}} \right) \\ & \leq 4 |\mathcal{X}_{\text{grid}}^{\text{far}}| \exp \left( -\frac{(c/2)^2 \varepsilon_0^2}{32t^2 (B_0 + a\varepsilon_0)^2} \right) + 4d |\mathcal{X}_{\text{grid}}^{\text{near}}| \exp \left( -\frac{(c/2)^2 \varepsilon_2^2}{16t^2 (B_2 + a\varepsilon_2)^2} \right) + 2\mathbb{P}_{\bar{E}}(F^c) + 2\mathbb{P}_{\bar{E}}(G^c). \end{aligned}$$

The first 2 terms are each bounded by  $\delta/7$  by setting  $t$  such that

$$\frac{1}{t^2} = 2^{13} \log \left( \frac{112\bar{N}d}{\delta} \right) \frac{(\bar{B} + 1)}{c^2 \varepsilon^2}$$

where  $\bar{B} \stackrel{\text{def.}}{=} \max\{B_0, B_2\}$ ,  $\varepsilon \stackrel{\text{def.}}{=} \min\{\varepsilon_0, \varepsilon_2\}$  and  $\bar{N} = \max \left( |\mathcal{X}_{\text{grid}}^{\text{near}}|, |\mathcal{X}_{\text{grid}}^{\text{far}}| \right)$ . The first term of (D.2) is bounded by  $\delta/7$  if

$$m \geq \frac{1}{t^2} \log \left( \frac{28(d+1)s}{\delta} \right) 64s \bar{L}_{01}^2 = s \bar{L}_{01}^2 \frac{2^{19} (\bar{B} + 1)}{c^2 \varepsilon^2} \log \left( \frac{112\bar{N}d}{\delta} \right) \log \left( \frac{28(d+1)s}{\delta} \right)$$

and the last 4 terms of (D.2) are each bounded by  $\delta/7$  provided that

$$m \gtrsim \log \left( \frac{28(s+d)d\bar{N}}{\delta} \right) \frac{16s(\bar{L}_2^2 B_{11} + \bar{L}_1^2 B_{22} + \bar{L}_{01} \bar{L}_2)}{c^2 \varepsilon^2}$$

So, to summarise, recalling that  $\delta = \rho/2$ ,  $\hat{\eta}_{X_0, a_0}$  is nondegenerate on  $\mathcal{X}_{\text{grid}}^{\text{near}}$  and  $\mathcal{X}_{\text{grid}}^{\text{far}}$  with probability at least  $1 - \delta$  (conditional on  $\bar{E}$ ) provided that

$$m \gtrsim \log \left( \frac{sdN}{\rho} \right) \log \left( \frac{sd}{\rho} \right) \frac{s(\bar{L}_2^2 B_{11} + \bar{L}_1^2 B_{22} + \bar{B} \bar{L}_{01}^2 + \bar{L}_{01} \bar{L}_2)}{\varepsilon^2}$$

and

$$\mathbb{P}(E_\omega^c) \lesssim \frac{\varepsilon}{\bar{B}^{3/2} \sqrt{s} \sqrt{\log(Nd/\rho)}} \quad \text{and} \quad \mathbb{E}[L_i(\omega) L_j(\omega) \mathbf{1}_{E_\omega^c}] \lesssim \frac{\varepsilon}{4s \sqrt{\bar{B}} \sqrt{\log(Nd/\rho)}}$$

**Step I (b): Deterministic signs** Assume now that  $\mathbf{u}$  consists of arbitrary signs. We will show that (D.3) can be bounded by  $c\varepsilon$  when  $m$  is chosen as in condition (b) of this theorem. Let  $F'$  be the event that

$$(a') \quad \left\| \Upsilon - \hat{\Upsilon} \right\| \leq \frac{t}{s^{1/4}} \quad \text{and} \quad \left\| \Upsilon^{-1} - \hat{\Upsilon}^{-1} \right\| \leq \frac{t}{s^{1/4}}$$

$$(b') \quad \forall y \in \mathcal{X}_{\text{grid}}^{\text{far}}, \left\| (\hat{\mathbf{f}}_{X_0}(y) - \mathbf{f}_{X_0}(y)) \right\| \leq \frac{a\varepsilon_0}{s^{1/4}}$$

$$(c') \quad \forall y \in \mathcal{X}_{\text{grid}}^{\text{near}}, \sup_{\|q\|=1} \left\| \mathbf{D}_2 \left[ (\hat{\mathbf{f}}_{X_0} - \mathbf{f}_{X_0})^\top q \right] (y) \right\| \leq \frac{a\varepsilon_2}{s^{1/4}}$$

$$(f) \left\| (\Upsilon - \hat{\Upsilon})\Upsilon^{-1}\mathbf{u} \right\|_{\text{Block}} \leq a\varepsilon \left\| \Upsilon^{-1}\mathbf{u} \right\|_{\text{Block}} \leq 2a\varepsilon.$$

Then, provided that

$$\mathbb{P}(E_\omega^c) \leq \frac{u}{u + 6s(B_0 + B_2)} \quad \text{and} \quad \mathbb{E}[L_{01}(\omega)^2 \mathbf{1}_{E^c}] \leq \frac{u}{4\bar{B}s^{3/2}},$$

with  $u = \min\{a\varepsilon_i, t\}$  as before, we have

$$\begin{aligned} \mathbb{P}_{\bar{E}}((F')^c) &\leq 4(d+1)s \exp\left(-\frac{mt^2}{16s^{3/2}\bar{L}_{01}^2(3+2t)}\right) \\ &\quad + 4sd |\mathcal{X}_{\text{grid}}^{\text{far}}| \exp\left(-\frac{m(a\varepsilon_0)^2/8}{s^{3/2}(\bar{L}_{01}^2(B_{11}+1) + \bar{L}_{01}^2)}\right) \\ &\quad + s(3d+d^2) |\mathcal{X}_{\text{grid}}^{\text{near}}| \exp\left(-\frac{m(a\varepsilon_2)^2/8}{s^{3/2}(\bar{L}_2^2 B_{11} + \bar{L}_1^2 B_{22} + \bar{L}_{01}\bar{L}_2)}\right) \\ &\quad + 32s \exp\left(-\frac{m4a^2\varepsilon^2}{s(32L_1^2 + 68a\varepsilon L_1\bar{L}_{01})}\right). \end{aligned}$$

where the first bound is from Proposition C.1, the second and third are from Proposition C.4 and the final bound is due to Proposition C.3.

To bound (D.3), we first observe that if event  $G$  holds, then just as observed previously,  $|\mathbf{D}_r [\mathbf{u}^\top \beta_2](y)| \leq 2a\varepsilon_r$ . To bound  $|\mathbf{u}^\top \beta_1(y)|$ , observe that

$$\begin{aligned} \mathbf{u}^\top \beta_1(y) &= \mathbf{u}^\top (\Upsilon^{-1} - \hat{\Upsilon}^{-1})(\hat{\mathbf{f}}_{X_0} - \mathbf{f}_{X_0}) + \mathbf{u}^\top (\Upsilon^{-1} - \hat{\Upsilon}^{-1})\mathbf{f}_{X_0} \\ &= \mathbf{u}^\top (\Upsilon^{-1} - \hat{\Upsilon}^{-1})(\hat{\mathbf{f}}_{X_0} - \mathbf{f}_{X_0}) + \mathbf{u}^\top \Upsilon^{-1}(\hat{\Upsilon} - \Upsilon)\hat{\Upsilon}^{-1}\mathbf{f}_{X_0} \\ &= \mathbf{u}^\top (\Upsilon^{-1} - \hat{\Upsilon}^{-1})(\hat{\mathbf{f}}_{X_0} - \mathbf{f}_{X_0}) + \mathbf{u}^\top \Upsilon^{-1}(\hat{\Upsilon} - \Upsilon)(\hat{\Upsilon}^{-1} - \Upsilon^{-1})\mathbf{f}_{X_0} + \mathbf{u}^\top \Upsilon^{-1}(\hat{\Upsilon} - \Upsilon)\Upsilon^{-1}\mathbf{f}_{X_0} \end{aligned}$$

Under event  $F'$ ,

- $\left| \mathbf{u}^\top (\Upsilon^{-1} - \hat{\Upsilon}^{-1})(\hat{\mathbf{f}}_{X_0} - \mathbf{f}_{X_0}) \right| \leq \sqrt{s} \left\| \Upsilon^{-1} - \hat{\Upsilon}^{-1} \right\| \left\| \hat{\mathbf{f}}_{X_0} - \mathbf{f}_{X_0} \right\| \leq ta\varepsilon$
- $\left| \mathbf{u}^\top \Upsilon^{-1}(\hat{\Upsilon} - \Upsilon)(\hat{\Upsilon}^{-1} - \Upsilon^{-1})\mathbf{f}_{X_0} \right| \leq \sqrt{s} \cdot 2 \cdot \left\| \hat{\Upsilon} - \Upsilon \right\| \left\| \hat{\Upsilon}^{-1} - \Upsilon^{-1} \right\| B_0 \leq 2t^2 B_0$
- $\left\| \Upsilon^{-1}(\hat{\Upsilon} - \Upsilon)\Upsilon^{-1}\mathbf{u} \right\|_{\text{Block}} \leq \left\| \Upsilon^{-1} \right\|_{\text{Block}} \left\| (\hat{\Upsilon} - \Upsilon)\Upsilon^{-1}\mathbf{u} \right\|_{\text{Block}} \leq 4a\varepsilon.$

Finally, given any vector  $q$  such that  $\|q\|_{\text{Block}} \leq 4a\varepsilon$ , we have  $|q^\top \mathbf{f}_{X_0}| \leq 4a\varepsilon B_0$ . Therefore,

$$\left| \mathbf{u}^\top \beta_1(y) \right| \leq ta + 2t^2 + 4a\varepsilon B_0,$$

and in a similar manner, we can show that the same upper bound holds for  $\|\mathbf{D}_2 [\mathbf{u}^\top \beta_1](y)\|$ .

Therefore,

$$\|\mathbf{D}_r [\mathbf{u}^\top \beta](y)\| \leq c\varepsilon_r \tag{D.5}$$

if both  $F'$  and  $G$  hold, so conditional on  $\bar{E}$ , (D.5) holds with probability at least  $1 - \delta$  provided that

$$m \gtrsim s^{3/2} \cdot \frac{(\bar{L}_2^2 B_{11} + \bar{L}_1^2 B_{22} + \bar{B}\bar{L}_{01}^2 + \bar{L}_{01}\bar{L}_2)}{\varepsilon^2} \cdot \log\left(\frac{\bar{N}ds}{\rho}\right)$$

and

$$\mathbb{P}(E_\omega^c) \lesssim \frac{\varepsilon}{\bar{B}^{3/2}s\sqrt{\log(\bar{N}d/\rho)}} \quad \text{and} \quad \mathbb{E}[L_i(\omega)L_j(\omega)\mathbf{1}_{E_\omega^c}] \lesssim \frac{\varepsilon}{s^{3/2}\sqrt{B}\sqrt{\log(\bar{N}d/\rho)}}$$

**Step II: Extending to the entire space** To prove that  $\hat{\eta}_{X_0, a_0}$  is nondegenerate on the entire space  $\mathcal{X}$ , we first show that  $\hat{\eta}_{X_0, a_0}$  is locally Lipschitz (and hence determine how fine our grids  $\mathcal{X}_{\text{grid}}^{\text{near}}$ ,  $\mathcal{X}_{\text{grid}}^{\text{far}}$  need to be): for  $x, x' \in \mathcal{X}$  with  $d_{\mathbf{H}}(x, x') \leq r_{\text{near}}$ ,

$$\begin{aligned} \|\mathbf{D}_r [\hat{\eta}_{X_0, a_0}] (x) - \mathbf{D}_r [\hat{\eta}_{X_0, a_0}] (x')\| &= \left\| \frac{1}{m} \sum_{k=1}^m \mathbf{D}_r \left[ \text{Re} \left( (\hat{\Upsilon}_X^{-1} \mathbf{u})^\top \gamma(\omega_k) \varphi_{\omega_k} \right) \right] (x) \right. \\ &\quad \left. - \mathbf{D}_r \left[ \text{Re} \left( (\hat{\Upsilon}_X^{-1} \mathbf{u})^\top \gamma(\omega_k) \varphi_{\omega_k} \right) \right] (x') \right\| \end{aligned} \quad (\text{D.6})$$

$$\begin{aligned} &= \left\| \frac{1}{m} \sum_{j=1}^m \text{Re} \left( \left( (\hat{\Upsilon}_X^{-1} \mathbf{u})^\top \gamma(\omega_k) \right) \cdot \left( \mathbf{D}_r [\varphi_{\omega_k}] (x) - \mathbf{D}_r [\varphi_{\omega_k}] (x') \right) \right) \right\| \\ &\leq \left\| \hat{\Upsilon}_X^{-1} \right\| \|\mathbf{u}\| \sqrt{s} \bar{L}_{01} \|\mathbf{D}_r [\varphi_{\omega_k}] (x) - \mathbf{D}_r [\varphi_{\omega_k}] (x')\| \end{aligned} \quad (\text{D.7})$$

$$\leq 4s \bar{L}_{01} d_{\mathbf{H}}(x, x') \mathcal{L}_r \leq c\varepsilon_r. \quad (\text{D.8})$$

where we have applied Lemma C.2 to obtain the last line.

Choosing  $\mathcal{X}_{\text{grid}}^{\text{far}}$  to be a  $\delta_0 \stackrel{\text{def}}{=} \frac{c\varepsilon_0}{4\mathcal{L}_0 \bar{L}_{01} s}$ -covering of  $\mathcal{X}^{\text{near}}$  (of size at most  $\mathcal{O}(R_{\mathcal{X}}/\delta_0)$ ),  $\mathcal{X}_{\text{grid}}^{\text{far}}$  to be a  $\delta_2 \stackrel{\text{def}}{=} \frac{c\varepsilon_2}{4\mathcal{L}_2 \bar{L}_{01} s}$ -covering of  $\mathcal{X}^{\text{far}}$  (of size at most  $\mathcal{O}(R_{\mathcal{X}}/\delta_2)$ ). Then for any  $x \in \mathcal{X}^{\text{near}}$  and  $x' \in \mathcal{X}_{\text{grid}}^{\text{near}}$  such that  $d_{\mathbf{H}}(x, x') \leq \delta_0$ ,

$$|\hat{\eta}_{X_0, a_0}(x)| \leq |\hat{\eta}_{X_0, a_0}(x')| + |\hat{\eta}_{X_0, a_0}(x) - \hat{\eta}_{X_0, a_0}(x')| \leq 1 - \varepsilon_0 + 2c\varepsilon_0.$$

and given any  $x \in \mathcal{X}^{\text{far}}$ , let  $x' \in \mathcal{X}_{\text{grid}}^{\text{far}}$  be such that  $d_{\mathbf{H}}(x, x') \leq \delta_2$ , so

$$\begin{aligned} \text{Re} \left( \overline{\text{sign}(a_{0,i})} \mathbf{D}_2 [\hat{\eta}_{X_0, a_0}] (x) \right) &\preceq \text{Re} \left( \overline{\text{sign}(a_{0,i})} \mathbf{D}_2 [\hat{\eta}_{X_0, a_0}] (x') \right) + \|\mathbf{D}_2 [\hat{\eta}_{X_0, a_0}] (x) - \mathbf{D}_2 [\hat{\eta}_{X_0, a_0}] (x')\| \text{Id} \\ &\preceq (-\varepsilon_2 + 2c\varepsilon_2) \text{Id}, \end{aligned}$$

and

$$\left\| \text{Im} \left( \overline{\text{sign}(a_{0,i})} \mathbf{D}_2 [\hat{\eta}_{X_0, a_0}] (x) \right) \right\| \leq \left\| \text{Im} \left( \overline{\text{sign}(a_{0,i})} \mathbf{D}_2 [\hat{\eta}_{X_0, a_0}] (x') \right) \right\| + c\varepsilon_2 \leq (c_2 + c)\varepsilon_2. \quad \square$$

## D.2 Nondegeneracy transfer to $\hat{\eta}_{X, a}$ .

We are now ready to prove Theorem 3, which we restate below for clarity.

**Theorem D.2.** *Suppose that the assumptions of Theorem D.1 hold, and the following holds with probability at least  $1 - \rho$ : for all  $X$  such that*

$$d_{\mathbf{H}}(X, X_0) \lesssim \min \left( r_{\text{near}}, \varepsilon_r (C_{\mathbf{H}} B \sqrt{s})^{-1}, \varepsilon_r (C_{\mathbf{H}} \bar{L}_{12} \bar{L}_r \sqrt{s})^{-1} \right), \quad (\text{D.9})$$

and  $\|a - a_0\| \lesssim \frac{\varepsilon_r}{\max(B_r)} \min_i |a_{0,i}|$ . Then,  $\hat{\eta}_{X, a} \stackrel{\text{def}}{=} \Phi^* \Gamma_X^{*, \dagger}(\text{sign}(a))$  satisfies

$$(i) \text{ for all } y \in \mathcal{X}^{\text{far}}, |\hat{\eta}_{X, a}(y)| \leq 1 - \frac{13}{32} \varepsilon_0$$

$$(ii) \text{ for all } y \in \mathcal{X}^{\text{near}}(i), -\text{Re} \left( \overline{\text{sign}(a_i)} \mathbf{D}_2 [\hat{\eta}_{X, a}] (y) \right) \succcurlyeq \frac{13\varepsilon_2}{32} \text{Id} \text{ and } \left\| \text{Im} \left( \overline{\text{sign}(a_i)} \mathbf{D}_2 [\hat{\eta}_{X, a}] (y) \right) \right\| \leq \left( \frac{p}{2} + \frac{3p}{16} \right) \frac{1}{2} \varepsilon_2.$$

Hence,  $\hat{\eta}_{X, a}$  is  $(\frac{13}{32} \varepsilon_0, \frac{13}{32} \varepsilon_2)$ -nondegenerate.

The proof essentially exploits the fact that  $\hat{\Upsilon}_X$ ,  $\hat{\mathbf{f}}_X$  are locally Lipschitz in  $X$  with respect to the metric  $d_{\mathbf{H}}$ , and consequently nondegeneracy of  $\hat{\eta}_{X_0, a_0}$  implies nondegeneracy of  $\hat{\eta}_{X, a}$  whenever  $d_{\mathbf{H}}(X, X_0)$  and  $\|a - a_0\|_2$  are sufficiently small.

### D.2.1 Proof of Theorem D.2

We begin with a lemma which shows that  $\hat{\Upsilon}_X$  is locally Lipschitz in  $X$ .

**Lemma D.1** (Lipschitz bound of  $\hat{\Upsilon}_X$ ). *Let  $X_0 \in \mathcal{X}^s$  be  $\Delta$ -separated points. Assume that for all  $i + j \leq 3$*

$$\mathbb{P}(E_\omega^c) \leq \frac{1}{1 + 16\sqrt{s}B_{ij}}, \quad \mathbb{E}[L_i(\omega)L_j(\omega)\mathbf{1}_{E_\omega^c}] \leq \frac{1}{16\sqrt{s}}$$

for all  $i, j = 0, \dots, 2$ . Let  $\rho > 0$  and

$$m \gtrsim s(\bar{L}_2^2 B_{11} + \bar{L}_1^2 B_{22} + \bar{L}_{01}\bar{L}_2) \left( \log\left(\frac{sd}{\rho}\right) + d \log\left(sC_{\mathbf{H}} \max_{i=0}^3 \bar{L}_i\right) \right)$$

Then, conditional on event  $\bar{E}$ , with probability at least  $1 - \rho$ , the following hold:

- (i) for all  $X$  such that  $d_{\mathbf{H}}(x_i, x_{0,i}) \leq r_{\text{near}}$ , we have

$$\left\| \hat{\Upsilon}_X - \hat{\Upsilon}_{X_0} \right\| \lesssim C_{\mathbf{H}} B d_{\mathbf{H}}(X, X_0).$$

- (ii) for all  $X$  such that  $d_{\mathbf{H}}(X, X_0) \lesssim \min\left(r_{\text{near}}, \frac{1}{C_{\mathbf{H}}B}\right)$ , we have  $\left\| \text{Id} - \hat{\Upsilon}_X \right\| \leq \frac{3}{4}$  and  $\left\| \mathbf{G}_X^{-\frac{1}{2}} \Gamma_X^* \right\| \lesssim 1$ .

*Proof.* By Lemma C.8 and Lemma C.10, with probability at least  $1 - \rho$  conditional on  $\bar{E}$ , for all  $(i, j) \in \{(0, 0), (0, 1), (1, 1), (1, 2)\}$  and all  $x, y \in \mathcal{X}^{\text{near}}$ ,

$$\left\| \hat{K}^{(ij)}(x, y) \right\| \leq \left\| K^{(ij)}(x, y) \right\| + \frac{1}{\sqrt{s}},$$

note that this also holds for  $\hat{K}^{(ji)}(x, y)$  since  $\hat{K}^{(ij)}(x, y) = \overline{\hat{K}^{(ij)}(y, x)}$ .

In particular, for all  $x, x'$  such that  $d_{\mathbf{H}}(x, x') \geq \Delta/4$ , we have  $\left\| \hat{K}^{(ij)}(x, x') \right\| \leq \frac{2}{\sqrt{s}}$ . Take any  $X$  such that  $d_{\mathbf{H}}(x_i, x_{0,i}) \leq r_{\text{near}}$ , we have that both  $x_i, x_{0,i}$  are at least  $\Delta/4$ -separated from  $x_j$  and  $x_{0,j}$ . Therefore, for  $k, \ell \in \{0, 1\}$ , using Lemma C.3:

$$\begin{aligned} \left\| \hat{K}^{(k\ell)}(x_i, x_j) - \hat{K}^{(k\ell)}(x_{i,0}, x_{j,0}) \right\| &\lesssim \frac{C_{\mathbf{H}}}{\sqrt{s}} \sqrt{d_{\mathbf{H}}(x_i, x_{0,i})^2 + d_{\mathbf{H}}(x_j, x_{0,j})^2} \\ \left\| \hat{K}^{(k\ell)}(x_i, x_i) - \hat{K}^{(k\ell)}(x_{i,0}, x_{i,0}) \right\| &\lesssim C_{\mathbf{H}} (B_{k+1,\ell} + B_{k,\ell+1}) d_{\mathbf{H}}(x_i, x_{0,i}) \end{aligned} \quad (\text{D.10})$$

and therefore by Lemma G.6:

$$\begin{aligned} \left\| \hat{\Upsilon}_X - \hat{\Upsilon}_{X_0} \right\|^2 &\leq \sum_{i,j=1}^s \sum_{k,\ell=0}^1 \left\| \hat{K}^{(k\ell)}(x_i, x_j) - \hat{K}^{(k\ell)}(x_{0,i}, x_{0,j}) \right\|^2 \\ &\leq 2 \sum_{i,j=1}^s \sum_{k,\ell=0}^1 \left\| \hat{K}^{(k\ell)}(x_i, x_j) - \hat{K}^{(k\ell)}(x_{0,i}, x_{j,0}) \right\|^2 + \left\| \hat{K}^{(\ell k)}(x_j, x_{0,i}) - \hat{K}^{(\ell k)}(x_{0,j}, x_{0,i}) \right\|^2 \\ &\lesssim C_{\mathbf{H}}^2 \left( \sum_{\substack{k,\ell \in \{0,1,2\} \\ k+\ell \leq 3}} B_{k\ell} \right)^2 \sum_i d_{\mathbf{H}}(x_i, x_{0,i})^2 + \frac{1}{s} \sum_{j \neq i} d_{\mathbf{H}}(x_j, x_{0,j})^2 \end{aligned}$$

which yields the desired result.



For the second statement, using Proposition C.1,  $\mathbb{P}_{\bar{E}}(\|\hat{\Upsilon}_{X_0} - \Upsilon_{X_0}\| > \frac{1}{8}) \leq \rho$ , so conditional on  $\bar{E}$ , we have with probability  $1 - \rho$ ,  $\|\hat{\Upsilon}_X - \hat{\Upsilon}_{X_0}\| \leq \frac{1}{8}$  and the claim follows since  $\|\text{Id} - \Upsilon_{X_0}\| \leq \frac{1}{2}$  (due to Lemma C.1) implies that  $\|\text{Id} - \hat{\Upsilon}_X\| \leq \frac{3}{4}$  and

$$\|\hat{\Upsilon}_X\| \leq 7/4 \quad \text{and} \quad \|\mathbf{G}_X^{-\frac{1}{2}} \Gamma_X^*\| = \sqrt{\|\hat{\Upsilon}_X\|} \lesssim \sqrt{7}/2.$$

□

*Proof of Theorem D.2.* Since  $\hat{\eta}_{X_0, a_0}$  is nondegenerate with probability at least  $1 - \rho$ , the conclusion follows if we prove that for all  $x \in \mathcal{X}^{\text{far}}$  and all  $y \in \mathcal{X}^{\text{near}}$ ,

$$\|\mathbf{D}_0 [\hat{\eta}_{X, a} - \hat{\eta}_{X_0, a_0}](x)\| \leq \varepsilon_0/32 \quad \text{and} \quad \|\mathbf{D}_2 [\hat{\eta}_{X, a} - \hat{\eta}_{X_0, a_0}](y)\| \leq p\varepsilon_2/32 \quad (\text{D.11})$$

with probability at least  $1 - \rho$ . We first write

$$\hat{\eta}_{X, a}(y) - \hat{\eta}_{X_0, a_0}(y) = \left( \hat{\Upsilon}_X^{-1} \begin{pmatrix} \text{sign}(a) \\ 0_{sd} \end{pmatrix} \right)^\top (\hat{\mathbf{f}}_X - \hat{\mathbf{f}}_{X_0}) + \left( \hat{\Upsilon}_X^{-1} \begin{pmatrix} \text{sign}(a) \\ 0_{sd} \end{pmatrix} - \hat{\Upsilon}_{X_0}^{-1} \begin{pmatrix} \text{sign}(a_0) \\ 0_{sd} \end{pmatrix} \right)^\top \hat{\mathbf{f}}_{X_0} \quad (\text{D.12})$$

Conditional on  $\bar{E}$ , with probability at least  $1 - \rho/2$ , we have by Lemma D.1 (note that our assumptions imply the assumptions of Lemma D.1),  $\|\Upsilon_X - \Upsilon_{X_0}\| \lesssim C_{\mathbf{H}} B d_{\mathbf{H}}(X, X_0)$  and  $\|\Upsilon_X^{-1}\| \leq 4$ . Combining this with Lemma C.2, we obtain  $\|\mathbf{D}_r \left[ \left( \hat{\Upsilon}_X^{-1} \begin{pmatrix} \text{sign}(a) \\ 0_{sd} \end{pmatrix} \right) (\hat{\mathbf{f}}_{X_0} - \hat{\mathbf{f}}_X) \right](y)\| \leq 4\sqrt{s} \bar{L}_r \sqrt{\mathcal{L}_0^2 + \mathcal{L}_1^2} d_{\mathbf{H}}(X, X_0)$ . For the second term of (D.12),

$$\begin{aligned} & \left\| \hat{\Upsilon}_X^{-1} \begin{pmatrix} \text{sign}(a) \\ 0_{sd} \end{pmatrix} - \hat{\Upsilon}_{X_0}^{-1} \begin{pmatrix} \text{sign}(a_0) \\ 0_{sd} \end{pmatrix} \right\| \\ &= \left\| \hat{\Upsilon}_X^{-1} \left( \begin{pmatrix} \text{sign}(a) \\ 0_{sd} \end{pmatrix} - \begin{pmatrix} \text{sign}(a_0) \\ 0_{sd} \end{pmatrix} \right) + \left( \hat{\Upsilon}_X^{-1} - \hat{\Upsilon}_{X_0}^{-1} \right) \begin{pmatrix} \text{sign}(a_0) \\ 0_{sd} \end{pmatrix} \right\| \\ &\leq 4 \|\text{sign}(a) - \text{sign}(a_0)\| + 8\sqrt{s} \|\hat{\Upsilon}_X - \hat{\Upsilon}_{X_0}\| \leq 8 \frac{\|a - a_0\|}{\min_i |a_{0,i}|} + 8\sqrt{s} C_{\mathbf{H}} B d_{\mathbf{H}}(X, X_0). \end{aligned}$$

So,  $\left\| \mathbf{D}_r \left[ \left( \hat{\Upsilon}_X^{-1} \begin{pmatrix} \text{sign}(a) \\ 0_{sd} \end{pmatrix} - \hat{\Upsilon}_{X_0}^{-1} \begin{pmatrix} \text{sign}(a_0) \\ 0_{sd} \end{pmatrix} \right)^\top \hat{\mathbf{f}}_{X_0} \right](y) \right\| \leq 16B_r \left( \frac{\|a - a_0\|}{\min_i |a_{0,i}|} + \sqrt{s} C_{\mathbf{H}} B d_{\mathbf{H}}(X, X_0) \right)$ .

Finally, since  $\mathbb{P}(\bar{E}^c) \leq \rho/2$ , we have with probability at least  $1 - \rho$ , for all  $y \in \mathcal{X}$ , (D.11) holds provided that (D.9) holds. Combining with the nondegeneracy of  $\hat{\eta}_{X_0, a_0}$ , the conclusion follows with probability  $1 - 2\rho$ . □

## E Supplementary results to the proof Theorem 1

Let  $\Phi_X : \mathbb{C}^s \rightarrow \mathbb{C}^m$  and its adjoint  $\Phi_X^* : \mathbb{C}^m \rightarrow \mathbb{C}^s$  be defined by

$$\forall a \in \mathbb{C}^s, \Phi_X a = \sum_{j=1}^s a_j \varphi(x_j) \in \mathbb{C}^m, \quad \text{and} \quad \forall q \in \mathbb{C}^m, \Phi_X^* q = (\langle \varphi(x_j), q \rangle)_{j=1}^s,$$

and  $(\Phi_X^{(1)}) : \mathbb{C}^{sd} \rightarrow \mathbb{C}^m$ ,

$$\forall P_i \in \mathbb{C}^d, (\Phi_X^{(1)})[P_1, \dots, P_s] = \left( \sum_{i=1}^s \langle \nabla \varphi_{\omega_k}(x_i), P_i \rangle \right)_{k=1}^m$$

with adjoint

$$\forall q \in \mathbb{C}^m, (\Phi_X^{(1)})^* q = (\nabla_x \langle \varphi(x_i), q \rangle)_{i=1}^s.$$

In the following, we interpret  $\Phi_X \in \mathbb{C}^{s \times m}$  and  $\Phi_X^{(1)} \in \mathbb{C}^{sd \times m}$  as matrices.

Recall that in the proof of Theorem 1, we defined the function  $f : \mathbb{R}^{2s} \times \mathcal{X}^s \times \mathbb{R}_+ \times \mathbb{R}^{2m} \rightarrow \mathbb{R}^{2s} \times \mathbb{C}^{sd}$  by

$$f(u, v) \stackrel{\text{def.}}{=} \begin{pmatrix} \text{Re}(\Phi_X^*(\Phi_X(a_r + ia_i) - \Phi_{X_0}a_0 - (w_r + iw_i))) \\ \text{Im}(\Phi_X^*(\Phi_X(a_r + ia_i) - \Phi_{X_0}a_0 - (w_r + iw_i))) \\ (\Phi_X^{(1)})^*(\Phi_X(a_r + ia_i) - \Phi_{X_0}a_0 - (w_r + iw_i)) \end{pmatrix} + \lambda \begin{pmatrix} \left(\frac{a_{r_i}}{|a_i|}\right)_{i=1}^s \\ \left(\frac{a_{i_i}}{|a_i|}\right)_{i=1}^s \\ 0_{sd} \end{pmatrix}$$

where  $u = (a_r, a_i, X)$ ,  $v = (\lambda, w_r, w_i)$  for  $a_r, a_i \in \mathbb{R}^s$ ,  $X \in \mathcal{X}^s$ ,  $\lambda > 0$ ,  $w_r, w_i \in \mathbb{R}^m$ , and  $a \stackrel{\text{def.}}{=} a_r + ia_i \in \mathbb{C}^s$ ,  $w \stackrel{\text{def.}}{=} w_r + iw_i$ .

**Differentiability of  $f$**  The function  $f$  is differentiable at all  $(u, v)$  such that  $i = 1, \dots, s$ ,  $a_r + ia_i \neq 0$ . Its differential can be written as

$$\partial_{w_r} f = - \begin{pmatrix} \text{Re}(\Phi_X^*) \\ \text{Im}(\Phi_X^*) \\ (\Phi_X^{(1)})^* \end{pmatrix}, \quad \partial_{w_i} f = -i \begin{pmatrix} \text{Re}(\Phi_X^*) \\ \text{Im}(\Phi_X^*) \\ (\Phi_X^{(1)})^* \end{pmatrix}, \quad \partial_\lambda f = \begin{pmatrix} \left(\frac{a_{r_i}}{|a_i|}\right)_i \\ \left(\frac{a_{i_i}}{|a_i|}\right)_i \\ 0_{sd} \end{pmatrix} \quad (\text{E.1})$$

so

$$\partial_v f(u, v) = \left( \begin{pmatrix} \left(\frac{a_{r_i}}{|a_i|}\right)_i \\ \left(\frac{a_{i_i}}{|a_i|}\right)_i \\ 0_{sd} \end{pmatrix}, - \begin{pmatrix} \text{Re}(\Phi_X^*) \\ \text{Im}(\Phi_X^*) \\ (\Phi_X^{(1)})^* \end{pmatrix}, -i \begin{pmatrix} \text{Re}(\Phi_X^*) \\ \text{Im}(\Phi_X^*) \\ (\Phi_X^{(1)})^* \end{pmatrix} \right) \in \mathbb{C}^{(2s+sd) \times (1+2m)}, \quad (\text{E.2})$$

and  $\partial_u f(u, v) = (M_1(u, v) + M_2(u, v)) \begin{pmatrix} \text{Id}_{s \times s} & 0 & 0 \\ 0 & \text{Id}_{s \times s} & \\ 0 & 0 & J_a \end{pmatrix}$  with  $M_1(u, v) \stackrel{\text{def.}}{=} \begin{pmatrix} D_{0,X} & \tilde{D}_{1,X} \\ D_{1,X} & D_{2,X} \end{pmatrix}$  and

$$M_2(u, v) \stackrel{\text{def.}}{=} \begin{pmatrix} C_1 & C_2 & \begin{pmatrix} A_{11} & 0 & \cdots & 0 \\ 0 & A_{12} & \cdots & 0 \\ \vdots & \vdots & \ddots & \vdots \\ 0 & 0 & \cdots & A_{1s} \\ A_{21} & 0 & \cdots & 0 \\ 0 & A_{22} & \cdots & 0 \\ \vdots & \vdots & \ddots & \vdots \\ 0 & 0 & \cdots & A_{2s} \end{pmatrix} \end{pmatrix} \begin{pmatrix} \text{Id} & 0 & 0 \\ 0 & \text{Id} & \\ 0 & 0 & J_a^{-1} \end{pmatrix} \quad (\text{E.3})$$

where

$$D_{0,X} \stackrel{\text{def.}}{=} \begin{pmatrix} \text{Re}(\Phi_X^* \Phi_X) & -\text{Im}(\Phi_X^* \Phi_X) \\ \text{Im}(\Phi_X^* \Phi_X) & \text{Re}(\Phi_X^* \Phi_X) \end{pmatrix}, \quad \tilde{D}_{1,X} \stackrel{\text{def.}}{=} \begin{pmatrix} \text{Re}(\Phi_X^* \Phi_X^{(1)} J_a) J_a^{-1} \\ \text{Im}(\Phi_X^* \Phi_X^{(1)} J_a) J_a^{-1} \end{pmatrix},$$

$$D_{1,X} \stackrel{\text{def.}}{=} \left( (\Phi_X^{(1)})^* \Phi_X \quad i(\Phi_X^{(1)})^* \Phi_X \right), \quad \text{and} \quad D_{2,X} \stackrel{\text{def.}}{=} (\Phi_X^{(1)})^* \Phi_X^{(1)}$$

and  $C_1, C_2 \in \mathbb{R}^{(ds+2s) \times s}$  are defined as

$$C_1 \stackrel{\text{def.}}{=} \lambda \begin{pmatrix} \text{diag} \left( \left( \frac{1}{|a_i|} - \frac{a_{r_i}^2}{|a_i|^3} \right) i \right) \\ \text{diag} \left( \left( -\frac{a_{i_i} a_{r_i}}{|a_i|^3} \right) i \right) \\ 0_{sd \times s} \end{pmatrix}, \quad C_2 \stackrel{\text{def.}}{=} \lambda \begin{pmatrix} \text{diag} \left( \left( -\frac{a_{i_i} a_{r_i}}{|a_i|^3} \right) i \right) \\ \text{diag} \left( \left( \frac{1}{|a_i|} - \frac{a_{i_i}^2}{|a_i|^3} \right) i \right) \\ 0_{sd \times s} \end{pmatrix},$$

$$A_{1j} \stackrel{\text{def}}{=} \begin{pmatrix} \text{Re}(\nabla_x \langle \varphi(x_j), z \rangle)^\top \\ \text{Im}(\nabla_x \langle \varphi(x_j), z \rangle)^\top \end{pmatrix}, \quad A_{2j} \stackrel{\text{def}}{=} \nabla_x^2 \langle \varphi(x_j), z \rangle, \quad z \stackrel{\text{def}}{=} (\Phi_X a - \Phi_{X_0} a_0 - w) \quad (\text{E.4})$$

and  $J_a \in \mathbb{R}^{sd \times sd}$  is the diagonal matrix:

$$J_a = \begin{pmatrix} a_1 \text{Id}_{d \times d} & & 0 \\ & \ddots & \\ 0 & & a_s \text{Id}_{d \times d} \end{pmatrix}.$$

Letting  $u_0 = (\text{Re}(a_0), \text{Im}(a_0), X_0)$  and  $v_0 = (0, 0, 0)$ , we have that  $M_2(u_0, v_0) = 0$  and  $\partial_u f(u_0, v_0)$  is invertible since  $\|\hat{\Upsilon}_{X_0} - \text{Id}\| \leq 1/8$ . Moreover,  $f(u_0, v_0) = 0$ . Hence, by the Implicit Function Theorem, there exists a neighbourhood  $V$  of  $v_0$ , a neighbourhood  $U$  of  $u_0$  and a differentiable function  $g : V \rightarrow U$  such that for all  $(u, v) \in U \times V$ ,  $f(u, v) = 0$  if and only if  $u = g(v)$ . To conclude, we simply need to bound the size of the region on which  $g$  is well defined, and to bound the error between  $g(v)$  and  $g(0)$ . This is done with the following theorem. Let us first remark that our assumptions imply that  $\mathbb{P}(\bar{E}^c) \leq \rho/2$  and

$$\mathbb{P}(E_\omega^c) \leq \frac{1}{1 + 16\sqrt{s}B_{ij}}, \quad \mathbb{E}[L_i(\omega)L_j(\omega)\mathbf{1}_{E_\omega^c}] \leq \frac{1}{16\sqrt{s}}, \quad (\text{E.5})$$

for all  $i, j = 0, \dots, 2$ . Therefore, it is sufficient to prove the existence of  $g$  conditional on event  $\bar{E}$ :

**Theorem E.1.** *Assume that for all  $i + j \leq 3$*

$$\mathbb{P}(E_\omega^c) \leq \frac{1}{1 + 16\sqrt{s}B_{ij}}, \quad \mathbb{E}[L_i(\omega)L_j(\omega)\mathbf{1}_{E_\omega^c}] \leq \frac{1}{16\sqrt{s}}$$

for all  $i, j = 0, \dots, 2$ . Let  $\rho > 0$  and suppose that

$$m \gtrsim s(\bar{L}_2^2 B_{11} + \bar{L}_1^2 B_{22} + \bar{L}_{01} \bar{L}_2) \left( \log \left( \frac{sd}{\rho} \right) + d \log(sC_{\mathbf{H}} \mathbb{L}_3) \right)$$

where  $\mathbb{L}_r \stackrel{\text{def}}{=} \max_{i \leq r} L_r$ . Then, conditional on event  $\bar{E}$ , with probability at least  $1 - \rho$ : there exists a  $\mathcal{C}^1$  function  $g$  such that, for all  $v = (\lambda, w)$  such that  $\|v\| \leq r$  with  $r$  satisfying

$$r = \mathcal{O} \left( \frac{1}{\sqrt{s}} \min \left( \frac{\min\{r_{\text{near}}, (C_{\mathbf{H}} B)^{-1}\}}{\min_i |a_{0,i}|}, \frac{1}{\bar{L}_{01} \bar{L}_{12} (1 + \|a_0\|)} \right) \right) \quad (\text{E.6})$$

we have  $f(g(v), v) = 0$  and  $g(0) = u_0$ . Furthermore, given  $(\lambda, w)$  in this ball,  $(a, X) \stackrel{\text{def}}{=} g((\lambda, w))$  satisfies

$$\|a - a_0\| + d_{\mathbf{H}}(X, X_0) \leq \frac{\sqrt{s}(\lambda + \|w\|)}{\min_i |a_{0,i}|}. \quad (\text{E.7})$$

Before proceeding to prove this result, we first remark that as discussed in the main paper, Lemma E.1 and Lemma E.2 below imply that given  $v = (\lambda, w_r, w_i) \in V$ ,  $u = g(v)$  indeed correspond to the unique solution of the BLASSO with regularisation parameter  $\lambda$  and noise  $w = w_r + iw_i$ . In particular, the combination of these two lemmas imply that the certificate  $\eta_{\lambda, w} \stackrel{\text{def}}{=} \Phi^* p_{\lambda, w}$  associated to  $a$  and  $X$  is close to the nondegenerate certificate  $\eta_{X, a} \stackrel{\text{def}}{=} \Phi^* p_{X, a}$  when  $\|w\|/\lambda$  and  $\lambda$  are sufficiently small. In the following,  $\Pi_X \stackrel{\text{def}}{=} (\text{Id} - \Gamma_X \Gamma_X^\dagger)$  is the orthogonal projection onto  $\text{Im}(\Gamma_X)^\perp$ .

**Lemma E.1.** *Given  $u = (a_r, a_i, X)$  and  $v = (\lambda, w_r, w_i)$  such that  $f(u, v) = 0$ , write  $a = a_r + ia_i$  and  $w = w_r + iw_i$ . Let  $p_{\lambda, w} \stackrel{\text{def}}{=} \frac{1}{\lambda} (\Phi_{X_0} a_0 - \Phi_X a + w)$ . Then,*

$$p_{\lambda, w} = p_{X, a} + \frac{1}{\lambda} \Pi_X w + \frac{1}{\lambda} \Pi_X \Phi_{X_0} a_0.$$

*Proof.* The equation  $f(u, v) = 0$  can be written as

$$\Gamma_X^* \left( \Gamma_X \begin{pmatrix} a \\ 0_{sd} \end{pmatrix} - \Gamma_{X_0} \begin{pmatrix} a_0 \\ 0_{sd} \end{pmatrix} - w \right) + \lambda \begin{pmatrix} \text{sign}(a) \\ 0_{sd} \end{pmatrix} = 0$$

By applying  $\tilde{\Gamma}_X (\tilde{\Gamma}_X^* \tilde{\Gamma}_X)^\dagger$  to the above equation, we obtain

$$\Gamma_X \begin{pmatrix} a \\ 0_{sd} \end{pmatrix} - \Gamma_X \Gamma_X^\dagger \Gamma_{X_0} \begin{pmatrix} a_0 \\ 0_{sd} \end{pmatrix} - \Gamma_X \Gamma_X^\dagger w + \lambda \Gamma_X^{*,\dagger} \begin{pmatrix} \text{sign}(a) \\ 0_{sd} \end{pmatrix} = 0 \quad (\text{E.8})$$

Therefore, since  $\Pi_X = (\text{Id} - \Gamma_X \Gamma_X^\dagger)$ , we have

$$-\Phi_X a + \Phi_{X_0} a_0 + w = \Pi_X \Phi_{X_0} a_0 + \Pi_X w + \lambda \Gamma_X^{*,\dagger} \begin{pmatrix} \text{sign}(a) \\ 0_{sd} \end{pmatrix} \quad (\text{E.9})$$

and by dividing by  $\lambda$ , we obtain the desired equation.  $\square$

**Lemma E.2.** *Assume that event  $\bar{E}$  occurs. Then, for all  $X \in \mathcal{X}^s$  such that  $d_{\mathbf{H}}(x_i, x_{0,i}) \leq r_{\text{near}}$  and  $a \in \mathbb{C}^s$ ,*

$$\|\Pi_X \Gamma_{X_0} a\| \lesssim \begin{cases} \bar{L}_2 \|a\|_1 \max_i d_{\mathbf{H}}(x_i, x_{0,i})^2 \\ \bar{L}_2 \|a\|_\infty d_{\mathbf{H}}(X, X_0)^2 \end{cases}$$

*Proof.* Let  $\gamma_i : [0, 1] \rightarrow \mathcal{X}$  be any piecewise smooth curve such that  $\gamma_i(1) = x_{0,i}$  and  $\gamma_i(0) = x_i$ . Then, by Taylor expanding  $\varphi_{\omega_k}(\gamma_i(t))$  about  $t = 0$ , we obtain

$$\varphi_{\omega_k}(x_{0,i}) = \varphi(x_i) + \langle \nabla \varphi_{\omega_k}(x_i), \gamma_i'(0) \rangle + \int_0^1 \frac{1}{2} \langle \nabla^2 \varphi_{\omega_k}(\gamma_i(t)) \gamma_i'(t), \gamma_i'(t) \rangle dt.$$

Therefore, since  $\text{Im}(\Gamma_X) = \{\varphi(x_i), J_\varphi(x_i)\}_i$  where  $J_\varphi$  denotes the Jacobian of  $\varphi$ , and  $\Pi_X$  is a projector on  $\text{Im}(\Gamma_X)^\perp$ ,

$$\Pi_X \Gamma_{X_0} a = \Pi_X \left( \sum_{i=1}^s a_i \varphi(x_{0,i}) \right) = \Pi_X \left( \sum_{i=1}^s \frac{a_i}{2} \int_0^1 \langle \nabla^2 \varphi_{\omega_k}(\gamma_i(t)) \gamma_i'(t), \gamma_i'(t) \rangle dt \right)_{k=1}^m$$

Taking the norm implies

$$\|\Pi_X \Gamma_{X_0} a\| \leq \sum_{i=1}^s \frac{|a_i|}{2} \int_0^1 \bar{L}_2 \|\mathbf{H}_{\gamma_i(t)} \gamma_i'(t)\|^2 dt \quad (\text{E.10})$$

since for  $d_{\mathbf{H}}(x_i, x_{0,i}) \leq r_{\text{near}}$ , we have  $\|\mathbf{H}_{x_{0,i}}^{-\frac{1}{2}} \mathbf{H}_{x_i}^{\frac{1}{2}}\| \lesssim 1$ , and hence, under  $\bar{E}$ :

$$\|\mathbf{H}_{x_{0,i}}^{-\frac{1}{2}} \nabla^2 \varphi_{\omega_j}(x_i) \mathbf{H}_{x_{0,i}}^{-\frac{1}{2}}\| \lesssim \|\mathbf{D}_2[\varphi_{\omega_j}](x_i)\| \leq \bar{L}_2.$$

Taking the infimum over all paths  $\gamma_i$  in (E.10) yields

$$\|\Pi_X \Gamma_{X_0} a\| \leq \bar{L}_2 \sum_i |a_i| d_{\mathbf{H}}(x_i, x_{0,i})^2.$$

$\square$

### E.0.1 Proof of Theorem E.1

### E.0.2 Preliminary results

We first discuss the invertibility of  $\partial_u f$ . To this end, we make the following definitions.

Let  $u = (a_r, a_i, X)$ ,  $u_0 = (\text{Re}(a_0), \text{Im}(a_0), X_0)$ ,  $v = (\lambda, w_r, w_i)$  and  $v_0 = (0, 0, 0)$ . We define the block diagonal matrices

$$\mathbf{F}_X \stackrel{\text{def.}}{=} \begin{pmatrix} \text{Id}_{s \times s} & 0 & 0 \\ 0 & \text{Id}_{s \times s} & 0 \\ 0 & 0 & \mathbf{G}_X \end{pmatrix} \quad \text{where} \quad \mathbf{G}_X \stackrel{\text{def.}}{=} \begin{pmatrix} \mathbf{H}_{x_1} & & 0 \\ & \ddots & \\ 0 & & \mathbf{H}_{x_s} \end{pmatrix}.$$

For  $(u, v)$  sufficiently close to  $(u_0, v_0)$ , we aim to show that  $\partial_u f(u, v)$  is invertible and to control  $\left\| \mathbf{F}_X^{-\frac{1}{2}} \partial_v f(u, v) \right\|$  and  $\left\| \mathbf{F}_X^{\frac{1}{2}} \partial_u f(u, v)^{-1} \mathbf{F}_X^{\frac{1}{2}} \right\|$ . Using Lemma D.1, conditional on event  $\bar{E}$ , with probability  $1 - \rho$  we have

$$\left\| \mathbf{F}_X^{-\frac{1}{2}} \partial_v f(u, v) \right\| \leq \| \mathbf{u} \| + \left\| \begin{pmatrix} \text{Re}(\Phi_X^*) \\ \text{Im}(\Phi_X^*) \\ \mathbf{G}_X^{-\frac{1}{2}}(\Phi_X^{(1)})^* \end{pmatrix} \right\| \lesssim \sqrt{s} \quad (\text{E.11})$$

To deduce invertibility of  $\partial_u f(u, v)$  and to bound  $\left\| \mathbf{F}_X^{\frac{1}{2}} \partial_u f(u, v)^{-1} \mathbf{F}_X^{\frac{1}{2}} \right\|$ , first observe that

$$\mathbf{F}_X^{-1/2} \partial_u f(u, v) \mathbf{F}_X^{-1/2} = \left( \mathbf{F}_X^{-1/2} M_1(u, v) \mathbf{F}_X^{-1/2} + \mathbf{F}_X^{-1/2} M_2(u, v) \mathbf{F}_X^{-1/2} \right) \begin{pmatrix} \text{Id} & 0 & 0 \\ 0 & \text{Id} & \\ 0 & 0 & J_a \end{pmatrix}$$

where  $\mathbf{F}_X^{-1/2} M_2(u, v) \mathbf{F}_X^{-1/2}$  is

$$\begin{pmatrix} C_1 & C_2 & \begin{pmatrix} \frac{1}{a_1} \left( \mathbf{H}_{x_1}^{-\frac{1}{2}} \text{Re}(\nabla[\langle \varphi, z \rangle](x_1)) \right)^\top & 0 & \cdots & 0 \\ \frac{1}{a_1} \left( \mathbf{H}_{x_1}^{-\frac{1}{2}} \text{Im}(\nabla[\langle \varphi, z \rangle](x_1)) \right)^\top & 0 & \cdots & 0 \\ 0 & \ddots & & \vdots \\ \vdots & \ddots & & \vdots \\ 0 & \cdots & 0 & \frac{1}{a_s} \left( \mathbf{H}_{x_s}^{-\frac{1}{2}} \text{Re}(\nabla[\langle \varphi, z \rangle](x_s)) \right)^\top \\ 0 & \cdots & 0 & \frac{1}{a_s} \left( \mathbf{H}_{x_s}^{-\frac{1}{2}} \text{Im}(\nabla[\langle \varphi, z \rangle](x_s)) \right)^\top \\ \frac{1}{a_1} \mathbf{H}_{x_1}^{-\frac{1}{2}} \nabla^2[\langle \varphi, z \rangle](x_1) \mathbf{H}_{x_1}^{-\frac{1}{2}} & 0 & \cdots & 0 \\ 0 & \ddots & & \vdots \\ \vdots & \ddots & & \vdots \\ 0 & \cdots & 0 & \frac{1}{a_s} \mathbf{H}_{x_s}^{-\frac{1}{2}} \nabla^2[\langle \varphi, z \rangle](x_s) \mathbf{H}_{x_s}^{-\frac{1}{2}} \end{pmatrix} \end{pmatrix}, \quad (\text{E.12})$$

where  $z = (\Phi_X a - \Phi_{X_0} a_0 - w)$ . Now, let us study the invertibility of  $\mathbf{F}_X^{-1/2} M_1(u, v) \mathbf{F}_X^{-1/2} + \mathbf{F}_X^{-1/2} M_2(u, v) \mathbf{F}_X^{-1/2}$  and bound the norm of its inverse.

**Lemma E.3** (Bound on  $M_2(u, v)$ ). *Assume that  $\bar{E}$  occurs and given  $\varepsilon > 0$ , let  $c_\varepsilon \stackrel{\text{def.}}{=} \frac{\varepsilon \min_i |a_{0,i}|}{2L_{12}}$ . Then, for all  $X \in \mathcal{X}^s$ ,  $a \in \mathbb{C}^s$  and  $w \in \mathbb{C}^m$  such that*

$$\lambda \leq \frac{\min_i |a_{0,i}|}{4}, \quad \|a - a_0\| \leq \frac{c_\varepsilon}{4L_0}, \quad \|w\| \leq \frac{c_\varepsilon}{4} \quad \text{and} \quad d_{\mathbf{H}}(X, X_0) \leq \min \left( r_{\text{near}}, \frac{c_\varepsilon}{4L_1 \|a_0\|} \right),$$

we have for  $u \stackrel{\text{def}}{=} (\text{Re}(a), \text{Im}(a), X)$  and  $v \stackrel{\text{def}}{=} (\text{Re}(w), \text{Im}(w), X)$ ,

$$\left\| \mathbf{F}_X^{-1/2} M_2(u, v) \mathbf{F}_X^{-1/2} \right\| \leq \varepsilon \quad \text{and} \quad \left\| \mathbf{F}_X^{-1/2} M_2(u, v) \mathbf{F}_X^{-1/2} \right\|_{\text{Block}} \leq \varepsilon$$

*Proof.* First note that for  $r \in \mathbb{N}_0$ ,

$$\left\| \mathbf{D}_r [\varphi^\top z] (x_i) \right\| \leq \frac{1}{\sqrt{m}} \sum_{j=1}^m \left\| z_j \mathbf{D}_r [\varphi_{\omega_j}] (x_i) \right\| \leq \bar{L}_r \|z\|$$

Now, for  $\bar{q} = [P_1, P_2, Q_1, \dots, Q_s] \in \mathbb{C}^{s(d+2)}$ , where  $P_i \in \mathbb{C}^s$  and  $Q_i \in \mathbb{C}^d$ , and  $\|\bar{q}\| = 1$ , we have

$$\begin{aligned} & \left\| \mathbf{F}_X^{-1/2} M_2(u, v) \mathbf{F}_X^{-1/2} \bar{q} \right\|^2 \\ & \lesssim \|C_1 P_1\|^2 + \|C_2 P_2\|^2 + \sum_{i=1}^s \left| \frac{1}{a_i} \left( \mathbf{H}_{x_i}^{-\frac{1}{2}} \nabla [\varphi^\top z] (x_i) \right)^\top Q_i \right|^2 + \left\| \frac{1}{a_i} \mathbf{H}_{x_i}^{-\frac{1}{2}} \nabla^2 [\varphi^\top z] (x_i) \mathbf{H}_{x_i}^{-\frac{1}{2}} Q_i \right\|^2 \\ & \lesssim \frac{\lambda^2}{\min_i |a_{0,i}|^2} + \frac{4}{\min_i |a_{0,i}|^2} \max_i \left( \left\| \mathbf{H}_{x_i}^{-\frac{1}{2}} \nabla [\varphi^\top z] (x_i) \right\|^2 + \left\| \mathbf{H}_{x_i}^{-\frac{1}{2}} \nabla^2 [\varphi^\top z] (x_i) \mathbf{H}_{x_i}^{-\frac{1}{2}} \right\|^2 \right) \\ & = \frac{\lambda^2}{\min_i |a_{0,i}|^2} + \frac{4}{\min_i |a_{0,i}|^2} \max_i \left( \left\| \mathbf{D}_1 [\varphi^\top z] (x_i) \right\|^2 + \left\| \mathbf{D}_2 [\varphi^\top z] (x_i) \right\|^2 \right) \\ & \leq \frac{\lambda^2}{\min_i |a_{0,i}|^2} + \frac{4}{\min_i |a_{0,i}|^2} (\bar{L}_1^2 + \bar{L}_2^2) \|z\|^2 \end{aligned}$$

where we have used the fact that  $\min_i |a_i| \geq \min_i |a_{0,i}| / 2$ . If  $\|\bar{q}\|_{\text{Block}} = 1$ , then

$$\begin{aligned} \left\| \mathbf{F}_X^{-1/2} M_2(u, v) \mathbf{F}_X^{-1/2} \bar{q} \right\|_{\text{Block}} & \lesssim \frac{\lambda}{\min_i |a_{0,i}|} + \max_i \left\{ \left| \left( \mathbf{H}_{x_i}^{-\frac{1}{2}} \nabla [\varphi^\top z] (x_i) \right)^\top Q_i \right|, \left\| \mathbf{H}_{x_i}^{-\frac{1}{2}} \nabla [\varphi^\top z] (x_i) \mathbf{H}_{x_i}^{-\frac{1}{2}} Q_i \right\|^2 \right\} \\ & \leq \frac{\lambda}{\min_i |a_{0,i}|} + \max_i \left\{ \left\| \mathbf{H}_{x_i}^{-\frac{1}{2}} \nabla [\varphi^\top z] (x_i) \right\|, \left\| \mathbf{H}_{x_i}^{-\frac{1}{2}} \nabla [\varphi^\top z] (x_i) \mathbf{H}_{x_i}^{-\frac{1}{2}} \right\|^2 \right\} \end{aligned}$$

and the same bound holds.

Now it remains to bound  $\|z\|$  (recall the definition of  $z$  from (E.4)). Writing  $\varphi(x) \stackrel{\text{def}}{=} (\varphi_{\omega_k}(x))_{k=1}^m$ , we have

$$\begin{aligned} \|z\| & = \left\| \sum_i (a_i \varphi(x_i) - a_{0,i} \varphi(x_{0,i})) - w \right\| \\ & \leq \bar{L}_0 \|a - a_0\| + \|a_0\| \max_k \sqrt{\sum_i |\varphi_{\omega_k}(x_i) - \varphi_{\omega_k}(x_{0,i})|^2} + \|w\| \\ & \leq \bar{L}_0 \|a - a_0\| + \|a_0\| \bar{L}_1 d_{\mathbf{H}}(X, X_0) + \|w\| \end{aligned}$$

where the last inequality follows from Lemma C.2. □

**Lemma E.4.** *If  $\|a - a_0\| \leq \frac{1}{2} \min |a_{0,i}|$  and  $\|\hat{\Upsilon}_X - \text{Id}\| \leq \varepsilon < \frac{1}{3}$ , then  $M_1(u, v)$  is invertible and*

$$\left\| \mathbf{F}_X^{\frac{1}{2}} M_1(u, v)^{-1} \mathbf{F}_X^{\frac{1}{2}} \right\| \leq \frac{4}{1 - \varepsilon - 4\varepsilon^2}.$$

*Proof.* By considering the Schur complement, we have that  $M_1(u, v)$  is invertible provided that

- (i)  $D_{2,X}$  is invertible

(ii)  $S \stackrel{\text{def}}{=} D_{0,X} - \tilde{D}_{1,X} D_{2,X}^{-1} D_{1,X}$  is invertible.

In this case,

$$M_1(u, v)^{-1} = \begin{pmatrix} S^{-1} & -S^{-1} \tilde{D}_{1,X} D_{2,X}^{-1} \\ -D_{2,X}^{-1} D_{1,X} S^{-1} & D_{2,X}^{-1} + D_{2,X}^{-1} S^{-1} \tilde{D}_{1,X} D_{2,X}^{-1} \end{pmatrix}.$$

To establish (i) and (ii): Note that  $\left\| \mathbf{G}_X^{-\frac{1}{2}} (\Phi_X^{(1)})^* \Phi_X \right\|$ ,  $\left\| \mathbf{G}_X^{-\frac{1}{2}} (\Phi_X^{(1)})^* \Phi_X \mathbf{G}_X^{-\frac{1}{2}} - \text{Id} \right\|$ ,  $\left\| \Phi_X^* \Phi_X - \text{Id} \right\| \leq \left\| \hat{\Upsilon}_X - \text{Id} \right\|$ . So, provided that  $\left\| \hat{\Upsilon}_X - \text{Id} \right\| \leq \varepsilon < 1$ , (i) is satisfied, and note that  $D_{0,X}$  on  $\mathbb{R}^{2s}$  is invertible if and only if  $\Phi_X^* \Phi_X$  is invertible on  $\mathbb{C}^s$  and  $\left\| (\Phi_X^* \Phi_X)^{-1} \right\| = \left\| D_{0,X}^{-1} \right\| \leq \frac{1}{(1-\varepsilon)}$  and since

$$\left\| \tilde{D}_{1,X} D_{2,X}^{-1} D_{1,X} \right\| \leq 2 \left\| \mathbf{G}_X^{\frac{1}{2}} \left( (\Phi_X^{(1)})^* \Phi_X^{(1)} \right)^{-1} \mathbf{G}_X^{\frac{1}{2}} \right\| \left\| \mathbf{G}_X^{-\frac{1}{2}} (\Phi_X^{(1)})^* \Phi_X \right\|^2 \leq \frac{4\varepsilon^2}{1-\varepsilon},$$

$S$  is invertible provided that  $4\varepsilon^2 < (1-\varepsilon)^2$ , which is true when  $\varepsilon < 1/3$ , and we have

$$\left\| S^{-1} \right\| \leq \frac{\left\| D_{0,X}^{-1} \right\|}{1 - \left\| \tilde{D}_{1,X} D_{2,X}^{-1} D_{1,X} \right\|} \leq \frac{1}{1 - \varepsilon - 4\varepsilon^2}.$$

Note that  $\left\| \mathbf{G}_X^{-\frac{1}{2}} \tilde{D}_{1,X} \right\|$ ,  $\left\| \mathbf{G}_X^{-\frac{1}{2}} D_{1,X} \right\| \leq \sqrt{2}\varepsilon$ . Then, by combining the above bounds, we have

$$\left\| \mathbf{F}_X^{\frac{1}{2}} M_1(u, v)^{-1} \mathbf{F}_X^{\frac{1}{2}} \right\| \leq \frac{4}{1 - \varepsilon - 4\varepsilon^2}$$

□

In the following given a metric  $d$  on some space  $\mathcal{Y}$ ,  $x \in \mathcal{Y}$  and  $r > 0$ , the ball of radius  $r$  around  $x$  is denoted by  $\mathcal{B}_d(x, r) \stackrel{\text{def}}{=} \{x' ; d(x', x) \leq r\}$ .

**Theorem E.2** (Quantitative implicit function theorem, adapted from [4]). *Let  $F : \mathcal{H} \times \mathcal{Y} \rightarrow \mathbb{C}^n$  be a differentiable mapping where  $\mathcal{H}$  is a Hilbert space,  $\mathcal{Y} \subseteq \mathbb{C}^{2s} \times \mathbb{C}^{sd}$ ,  $n = s(d+2)$ ,  $\|\cdot\|$  be a norm on  $\mathcal{H}$ . For each  $y \in \mathcal{Y}$ , suppose that there exists a positive definite matrix  $\mathbf{F}_y$ , and let  $d_{\mathbf{F}}$  be the associated metric. Let  $x_0 \in \mathcal{H}$ ,  $y_0 \in \mathcal{Y}$  and  $r_1, r_2 > 0$  be such that  $F(x_0, y_0) = 0$  and for  $x \in \mathcal{B}_{\|\cdot\|}(x_0, r_1)$ ,  $y \in \mathcal{B}_{d_{\mathbf{F}}}(y_0, r_2)$ ,  $\partial_y F(x, y)$  is invertible and*

$$\left\| \mathbf{F}_y^{-\frac{1}{2}} \partial_x F(x, y) \right\| \leq D_1 \quad \text{and} \quad \left\| \mathbf{F}_y^{\frac{1}{2}} \partial_y F(x, y)^{-1} \mathbf{F}_x^{\frac{1}{2}} \right\| \leq D_2.$$

*Then, defining  $R = \min\left(\frac{r_2}{D_1 D_2}, r_1\right)$ , there exists a unique Fréchet-differentiable mapping  $g : \mathcal{B}_{\|\cdot\|}(x_0, R) \rightarrow \mathcal{B}_{d_{\mathbf{F}}}(y_0, r_2)$  such that  $g(x_0) = y_0$  and for all  $x \in \mathcal{B}_{\|\cdot\|}(x_0, R)$ ,  $F(x, g(x)) = 0$ . Furthermore*

$$dg(x) = -(\partial_y F(x, g(x)))^{-1} \partial_x F(x, g(x))$$

*and consequently  $\left\| \mathbf{F}_{g(x)}^{\frac{1}{2}} dg(x) \right\| \leq D_1 D_2$ .*

*Proof.* Let  $V^* = \cup_{V \in \mathcal{V}} V$ , where  $\mathcal{V}$  is the collection of all open sets  $V$  of  $\mathcal{H}$  such that

1.  $x_0 \in V$ ,
2.  $V$  is star-shaped with respect to  $x_0$ ,
3.  $V \subset \mathcal{B}_{\|\cdot\|}(x_0, r_1)$ ,
4. there exists a  $\mathcal{C}^1$  function  $g : V \rightarrow \mathcal{B}_{d_{\mathbf{F}}}(y_0, r_2)$  such that  $g(x_0) = y_0$  and  $F(x, g(x)) = 0$  for all  $x \in V$ .

Observe that  $\mathcal{V}$  is non-empty by the (classical) Implicit Function Theorem. Moreover,  $\mathcal{V}$  is stable by union: indeed, all conditions except the last one are easy to check. Now, let  $V, \tilde{V} \in \mathcal{V}$  and  $g, \tilde{g}$  be corresponding functions. The set  $\bar{V} = \{x \in V \cap \tilde{V}, g(x) = \tilde{g}(x)\}$  is non-empty (it contains  $x_0$ ), and closed in  $V \cap \tilde{V}$ . Moreover, it is open: for any  $x \in \bar{V}$ , by our assumptions  $\partial_y F(x, g(x))$  is invertible and the Implicit Function theorem applies at  $(x, g(x))$ , and by the uniqueness of the mapping resulting from it we obtain an open set around  $x$  in which  $g$  and  $\tilde{g}$  coincide. Hence  $\bar{V}$  is both closed and open in  $V \cap \tilde{V}$ , and by the connectedness of it  $\bar{V} = V \cap \tilde{V}$ . Therefore, there exists a function  $g'$  defined on  $V \cup \tilde{V}$  that satisfies condition 4 above (it is defined as  $g$  on  $V$  and  $\tilde{g}$  on  $\tilde{V}$ , which is well-posed for their intersection), and  $\mathcal{V}$  is indeed stable by union.

Hence  $V^* \in \mathcal{V}$ , let  $g^*$  be its corresponding function. It is unique by the arguments above, satisfies  $F(x, g^*(x)) = 0$  and

$$\begin{aligned} \mathbf{F}_{g^*(x)}^{\frac{1}{2}} dg^*(x) &= -\mathbf{F}_{g^*(x)}^{\frac{1}{2}} (\partial_y F(x, g^*(x)))^{-1} \partial_x F(x, g^*(x)) \\ &= -(\mathbf{F}_{g^*(x)}^{-\frac{1}{2}} \partial_y F(x, g^*(x)) \mathbf{F}_{g^*(x)}^{-\frac{1}{2}})^{-1} \mathbf{F}_{g^*(x)}^{-\frac{1}{2}} \partial_x F(x, g^*(x)) \end{aligned}$$

for all  $x \in V^*$ . Note that by our assumptions  $\left\| \mathbf{F}_{g^*(x)}^{\frac{1}{2}} dg^*(x) \right\| \leq D_1 D_2$ .

We finish the proof by showing that  $V^*$  contains a ball of radius  $r_2/(D_1 D_2)$ . Let  $x \in \mathcal{H}$  with  $\|x\| = 1$ ,  $R_x = \sup\{R; x_0 + Rx \in V^*\}$ , and  $x^* = x_0 + R_x x \in \partial V^*$ . Clearly  $0 < R_x \leq r_1$  since  $V^*$  is open, assume  $R_x < r_1$ . Our goal is to show that in that case  $R_x \geq \frac{r_1}{D_1 D_2}$ . Since  $dg^*$  is bounded,  $g^*$  is uniformly continuous on  $V^*$  and it can be extended on  $\partial V^*$ , and by continuity  $F(x^*, g^*(x^*)) = 0$ . By contradiction, if  $g^*(x^*) \in \mathcal{B}_{d_{\mathbf{F}}}(y_0, r_2)$ , by our assumptions we can apply the Implicit Function Theorem at  $(x^*, g^*(x^*))$ , and therefore extend  $g^*$  on an open set  $V$  that is not included in  $V^*$  such that  $V \cup V^* \in \mathcal{V}$ , which contradicts the maximality of  $V^*$ . Hence  $d_{\mathbf{F}}(g^*(x^*), y_0) = r_2$ . Let  $\gamma: [0, 1] \rightarrow \mathcal{Y}$  be defined by  $\gamma(t) \stackrel{\text{def.}}{=} g^*(x^* + t(x_0 - x^*))$ , so  $\gamma'(t) = dg^*(\gamma(t))(x_0 - x^*)$ . Then,

$$\begin{aligned} r_2 = d_{\mathbf{F}}(g^*(x^*), g^*(x_0)) &\leq \sqrt{\int_0^1 \langle \mathbf{F}_{g^*(\gamma(t))} \gamma'(t), \gamma'(t) \rangle dt} \\ &= \sqrt{\int_0^1 \left\| \mathbf{F}_{g^*(\gamma(t))}^{\frac{1}{2}} dg^*(\gamma(t))(x_0 - x^*) \right\|^2 dt} \leq D_1 D_2 R_x. \end{aligned}$$

□

### E.0.3 Proof of Theorem E.1

Our goal is to apply Theorem E.2.

Since  $\left\| \text{Id} - \hat{\Upsilon}_X \right\| \leq \frac{1}{8}$  by Lemma D.1, and by applying Lemma E.4, we have that  $\left\| \left( \mathbf{F}_X^{-1/2} M_1(u, v) \mathbf{F}_X^{-1/2} \right)^{-1} \right\| \leq$

5. From Lemma E.3, under event  $\bar{E}$ , by taking

$$c \stackrel{\text{def.}}{=} \frac{\min_i |a_{0,i}|}{16\bar{L}_{12}} \tag{E.13}$$

for all  $X \in \mathcal{X}^s$ ,  $a \in \mathbb{C}^s$  and  $w \in \mathbb{C}^m$  such that

$$\lambda \leq \frac{\min_i |a_{0,i}|}{4}, \quad \|a - a_0\| \leq \frac{c}{4\bar{L}_0}, \quad \|w\| \leq \frac{c}{4} \quad \text{and} \quad d_{\mathbf{H}}(X, X_0) \leq \min\left(r_{\text{near}}, \frac{c}{4\bar{L}_1 \|a_0\|}\right),$$

we have  $\left\| \mathbf{F}_X^{-1/2} M_2(u, v) \mathbf{F}_X^{-1/2} \right\| \leq \frac{1}{8}$ .

In this case,  $\partial_u f(u, v)$  is invertible, and we have

$$\left\| (\mathbf{F}_X^{-\frac{1}{2}} \partial_u f(u, v) \mathbf{F}_X^{-\frac{1}{2}})^{-1} \right\| \lesssim \frac{1}{\min_i |a_{0,i}|}$$



since  $\|a - a_0\| \lesssim \min_i |a_{0,i}|$  by assumption.

Therefore we can apply Theorem E.2 with (recalling the definition of  $c$  in (E.13) and the bound (E.11)) with  $\mathcal{H} = \mathbb{R}_+ \times \mathbb{R}^{2m}$ ,

$$r_1 = c, \quad D_1 = \mathcal{O}(\sqrt{s}), \quad r_2 = \mathcal{O}\left(\min\left(r_{\text{near}}, \frac{c}{L_1 \|a_0\|}, \frac{c}{\bar{L}_0}, \frac{1}{C_{\mathbf{H}B}}\right)\right), \quad D_2 = \mathcal{O}\left(\frac{1}{\min_i |a_{0,i}|}\right)$$

with  $B = \sum_{i+j \leq 3} B_{ij}$ , we obtain that  $g(v)$  is defined for  $v \in V \stackrel{\text{def.}}{=} \mathcal{B}_{\|\cdot\|_2}(0, r)$  with

$$r \stackrel{\text{def.}}{=} \min\left(\frac{r_2}{D_1 D_2}, r_1\right) = \frac{r_2}{D_1 D_2} = \mathcal{O}\left(\min\left(\frac{r_{\text{near}}}{\sqrt{s} \min_i |a_{0,i}|}, \frac{1}{\sqrt{s} L_1 \bar{L}_{12} \|a_0\|}, \frac{1}{\sqrt{s} \bar{L}_{12} \bar{L}_0}, \frac{1}{\sqrt{s} \min_i |a_{0,i}| C_{\mathbf{H}B}}\right)\right)$$

such that  $g$  is  $C^1$ ,  $f(g(v), v) = 0$ ,  $g(v_0) = u_0$ , where we recall that  $u_0 = (a_0, X_0)$  and  $v_0 = (0, 0)$ .

Finally, from Theorem E.2 we also have that

$$\left\| \mathbf{F}_X^{\frac{1}{2}} dg(v) \right\| \leq D_1 D_2 \lesssim \frac{\sqrt{s}}{\min_i |a_{0,i}|}$$

and by defining  $\gamma(t) = g(v_0 + t(v - v_0))$  for  $t \in [0, 1]$ , we have the following error bound between  $u = g(v)$  and  $u_0 = g(v_0)$ :

$$\begin{aligned} d_{\mathbf{F}}(u, u_0) &= \sqrt{\|a - a_0\|_2^2 + d_{\mathbf{H}}(X, X_0)^2} \leq \sqrt{\int_0^1 \langle \mathbf{F}_{\gamma(t)} \gamma'(t), \gamma'(t) \rangle dt} \\ &= \sqrt{\int_0^1 \langle \mathbf{F}_{\gamma(t)} dg(tv)v, dg(tv)v \rangle dt} \\ &\leq \frac{\sqrt{s}}{\min_i |a_{0,i}|} \|v\|. \end{aligned}$$

## F Examples

### F.1 Jackson kernel

Let  $f \in \mathbb{N}$  and  $\mathcal{X} \in \mathbb{T}^d$  the  $d$ -dimensional torus. We consider the Jackson kernel

$$K(x, x') = \prod_{i=1}^d \kappa(x_i - x'_i),$$

where  $\kappa(x) \stackrel{\text{def.}}{=} \left( \frac{\sin\left(\left(\frac{f}{2}+1\right)\pi x\right)}{\left(\frac{f}{2}+1\right)\sin(\pi x)} \right)^4$ , with constant metric tensor

$$\mathbf{H}_x = C_f \text{Id} \quad \text{and} \quad d_{\mathbf{H}}(x, x') = C_f^{\frac{1}{2}} \|x - x'\|_2.$$

where  $C_f \stackrel{\text{def.}}{=} -\kappa''(0) = \frac{\pi^2}{3} f(f+4) \sim f^2$ . Note that  $K^{(ij)} = C_f^{-(i+j)/2} \nabla_1^i \nabla_2^j K$  and since the metric is constant, we can set  $C_{\mathbf{H}} \stackrel{\text{def.}}{=} 0$ .

#### F.1.1 Discrete Fourier sampling

A random feature expansion associated with the Jackson kernel is obtained by choosing  $\Omega = \{\omega \in \mathbb{Z}^d; \|\omega\|_{\infty} \leq f\}$ ,  $\varphi_{\omega}(x) \stackrel{\text{def.}}{=} e^{i2\pi\omega^{\top}x}$ , and  $\Lambda(\omega) = \prod_{j=1}^d g(\omega_j)$  where  $g(j) = \frac{1}{f} \sum_{k=\max(j-f, -f)}^{\min(j+f, f)} (1 - |k/f|)(1 - |(j-k)/f|)$ . Note that this corresponds to sampling *discrete* Fourier frequencies. In this case, the derivatives of the random features are uniformly bounded with  $\|\nabla^j \varphi_{\omega}(x)\| = \|\omega\|^j = \mathcal{O}(C_f^{j/2} d^{j/2})$ . So, we can set  $\bar{L}_i = \mathcal{O}(d^{i/2})$ .

### F.1.2 Admissibility of the kernel

**Theorem F.1.** *Suppose that  $f \geq 128$ . Then,  $K$  is an admissible kernel with  $r_{\text{near}} = 1/(8\sqrt{2})$ ,  $\varepsilon_2 = 0.941$ ,  $\varepsilon_0 = 0.00097$ ,  $h = \mathcal{O}(d^{-1/2})$  and  $\Delta = \mathcal{O}(d^{1/2}s_{\text{max}}^{1/4})$ ,  $B_{00} = B_{11} = B_{20} = \mathcal{O}(1)$ ,  $B_{01} = \mathcal{O}(d^{1/2})$  and  $B_{22} = \mathcal{O}(d)$ .*

The remainder of this section is dedicated to proving this theorem. The uniform bounds on  $B_{ij}$  are due to Lemma F.4 (uniform bounds), and the bound on  $\Delta$  and  $h$  are due to Lemma F.3. From Lemma F.1, we see that by setting  $r_{\text{near}} \stackrel{\text{def.}}{=} \frac{1}{8\sqrt{2}}$ , for all  $d_{\mathbf{H}}(x, x') \leq r_{\text{near}}$ ,  $K^{(20)}(x, x') \prec -\varepsilon_2 \text{Id}$  with  $\varepsilon_2 = (1 - 6r_{\text{near}}^2)(1 - r_{\text{near}}^2/(2 - r_{\text{near}}^2) - r_{\text{near}}^2) \geq 0.941$ . Finally, from Lemma F.2, we have that for all  $d_{\mathbf{H}}(x, x') \geq r_{\text{near}}$ ,  $|K| \leq 1 - 1/(8^3 \cdot 2)$ , so we can set  $\varepsilon_0 \stackrel{\text{def.}}{=} 0.00097$ .

Before proving these lemmas, we first summarise in Section F.1.3 some key properties of the univariate Jackson kernel  $\kappa$  when  $f \geq 128$  which were derived in [2].

For notational convenience, write  $t_i \stackrel{\text{def.}}{=} x_i - x'_i$ ,  $\kappa_i \stackrel{\text{def.}}{=} \kappa(t_i)$ ,  $\kappa'_i \stackrel{\text{def.}}{=} \kappa'(t_i)$ , and so on. Let

$$K_i \stackrel{\text{def.}}{=} \prod_{\substack{k=1 \\ k \neq i}}^d \kappa_k, \quad K_{ij} \stackrel{\text{def.}}{=} \prod_{\substack{k=1 \\ k \neq i, j}}^d \kappa_k \quad \text{and} \quad K_{ij\ell} \stackrel{\text{def.}}{=} \prod_{\substack{k=1 \\ k \neq i, j, \ell}}^d \kappa_k.$$

With this, we have:

$$\begin{aligned} \partial_{1,i} K(x, x') &= \kappa'_i K_i \\ \partial_{1,i} \partial_{2,i} K(x, x') &= -\kappa''_i K_i, \quad \text{and} \quad \forall i \neq j, \quad \partial_{1,i} \partial_{2,j} K(x, x') = -\kappa'_i \kappa'_j K_{ij}. \end{aligned}$$

Where convenient, we sometimes write  $K(t) = K(x - x') \stackrel{\text{def.}}{=} K(x, x')$ .

### F.1.3 Properties of $\kappa$

From [2, Equations (2.20)-(2.24) and (2.29)], for all  $t \in [-1/2, 1/2]$  and  $\ell = 0, 1, 2, 3$ :

$$\begin{aligned} 1 - \frac{C_f}{2} t^2 &\leq \kappa(t) \leq 1 - \frac{C_f}{2} t^2 + 8 \left( \frac{1 + 2/f}{1 + 2/(2 + f)} \right)^2 C_f^2 t^4 \leq 1 - \frac{C_f}{2} t^2 + 8C_f^2 t^4 \\ |\kappa'(t)| &\leq C_f t, \quad |\kappa''(t)| \leq C_f, \quad |\kappa'''(t)| \leq 3 \left( \frac{1 + 2/f}{1 + 2/(2 + f)} \right)^2 C_f^2 t \leq 12C_f^2 t \\ \kappa'' &\leq -C_f + \frac{3}{2} \left( \frac{1 + 2/f}{1 + 2/(2 + f)} \right)^2 C_f^2 t^2 \leq -C_f + 6C_f^2 t^2. \end{aligned} \quad (\text{F.1})$$

By [2, Lemma 2.6],

$$|\kappa^{(\ell)}(t)| \leq \begin{cases} \frac{\pi^\ell H_\ell(t)}{(f+2)^{4-\ell} t^4}, & t \in [\frac{1}{2f}, \frac{\sqrt{2}}{\pi}] \\ \frac{\pi^\ell H_\ell^\infty}{(f+2)^{4-\ell} t^4}, & t \in [\frac{\sqrt{2}}{\pi}, \frac{1}{2}], \end{cases}$$

where  $H_0^\infty \stackrel{\text{def.}}{=} 1$ ,  $H_1^\infty \stackrel{\text{def.}}{=} 4$ ,  $H_2^\infty \stackrel{\text{def.}}{=} 18$  and  $H_3^\infty \stackrel{\text{def.}}{=} 77$ , and  $H_\ell(t) \stackrel{\text{def.}}{=} \alpha^4(t) \beta_\ell(t)$ , with

$$\alpha(t) \stackrel{\text{def.}}{=} \frac{2}{\pi(1 - \frac{\pi^2 t^2}{6})}, \quad \bar{\beta}(t) \stackrel{\text{def.}}{=} \frac{\alpha(t)}{ft} = \frac{2}{ft\pi(1 - \frac{\pi^2 t^2}{6})}$$

and  $\beta_0(t) \stackrel{\text{def.}}{=} 1$ ,  $\beta_1(t) \stackrel{\text{def.}}{=} 2 + 2\bar{\beta}(t)$ ,  $\beta_2 \stackrel{\text{def.}}{=} 4 + 7\bar{\beta}(t) + 6\bar{\beta}(t)^2$  and  $\beta_3(t) \stackrel{\text{def.}}{=} 8 + 24\bar{\beta} + 30\bar{\beta}(t)^2 + 15\bar{\beta}(t)^3$ . Let us first remark that  $\bar{\beta}$  is decreasing on  $I \stackrel{\text{def.}}{=} [\frac{1}{2f}, \frac{\sqrt{2}}{\pi}]$ , so  $|\bar{\beta}(t)| \leq |\bar{\beta}(1/(2f))| \approx 1.2733$ , and  $a(t) \leq a(\sqrt{2}/\pi) = \frac{3}{\pi}$

on  $I$ . Therefore, on  $I$ ,  $H_0(t) \leq \frac{3}{\pi}$ ,  $H_1(t) \leq 3.79$ ,  $H_2(t) \leq 18.83$  and  $H_3(t) \leq 98.26$ , and we can conclude that on  $[\frac{1}{2f}, \frac{1}{2})$ , we have

$$\left| \kappa^{(\ell)}(t) \right| \leq \frac{\pi^\ell \bar{H}_\ell^\infty}{(f+2)^{4-\ell t^4}}$$

where  $\bar{H}_0^\infty = 1$ ,  $\bar{H}_1^\infty \stackrel{\text{def.}}{=} 4$ ,  $\bar{H}_2^\infty \stackrel{\text{def.}}{=} 19$ ,  $\bar{H}_3^\infty \stackrel{\text{def.}}{=} 99$ . Combining with (F.1), we have  $\|\kappa^{(\ell)}\|_\infty \leq \kappa_\ell^\infty$  where  $\kappa_0^\infty \stackrel{\text{def.}}{=} 1$ ,  $\kappa_2^\infty \stackrel{\text{def.}}{=} C_f$ ,

$$\begin{aligned} \kappa_1^\infty &\stackrel{\text{def.}}{=} \sqrt{C_f} \max \left( \frac{2\pi^4}{\left(\frac{1}{2} + \frac{1}{f}\right)^3} \frac{f}{\sqrt{C_f}}, \frac{\sqrt{C_f}}{2f} \right) = \mathcal{O}(\sqrt{C_f}) \\ \kappa_3^\infty &\stackrel{\text{def.}}{=} (C_f)^{3/2} \max \left( \frac{99\pi^3}{\left(\frac{1}{2} + \frac{1}{f}\right)} \left( \frac{2f}{\sqrt{C_f}} \right)^4, \frac{6\sqrt{C_f}}{f} \right) = \mathcal{O}((C_f)^{3/2}). \end{aligned}$$

Finally, given  $p \in (0, 1)$ ,

$$(f+2)^4 t^4 \geq (1+p(f+2)^2 t^2)^2, \quad \forall t \geq \frac{1}{\sqrt{(1-p)(f+2)}}.$$

Choosing  $p = \frac{1}{2}$  and using  $(f+2)^2 = (\frac{3}{\pi^2} C_f + 4) \geq \frac{3}{\pi^2} C_f$ , we have

$$\left| \kappa^{(\ell)}(t) \right| \leq \frac{\kappa_\ell^\infty}{\left(1 + \frac{3}{2\pi^2} C_f t^2\right)^2}, \quad \forall t^2 \geq \frac{2\pi^2}{3C_f}, \quad (\text{F.2})$$

#### F.1.4 Bounds in neighbourhood of $x' = x$

**Lemma F.1.** *Suppose that  $C_f \|t\|_2^2 \leq c$  with  $c > 0$  such that*

$$\varepsilon \stackrel{\text{def.}}{=} (1-6c) \left(1 - \frac{c}{2-c}\right) - c > 0$$

Then,  $\hat{K}^{02}(t) \preceq -\varepsilon \text{Id}$ .

*Proof.* We need to show that  $\lambda_{\min}(-K^{(02)}(t)) \geq b$ . Let  $q \in \mathbb{R}^d$ , and note that

$$\begin{aligned} -\langle \nabla_2^2 K q, q \rangle &= -\sum_i \left( q_i \kappa_i'' K_i - \kappa_i' \sum_{j \neq i} q_j \kappa_j' K_{ij} \right) q_i \\ &= -\left( \sum_i q_i^2 \kappa_i'' K_i - \sum_i q_i \kappa_i' \sum_{j \neq i} q_j \kappa_j' K_{ij} \right) \\ &\geq \|q\|^2 \left( -\max_i \{ \kappa_i'' K_i \} - \sum_j |\kappa_j'|^2 \right). \end{aligned} \quad (\text{F.3})$$

We first consider  $\kappa_i'' K_i$ :

$$\begin{aligned} \kappa_i'' &\leq -C_f + 6C_f^2 t_i^2, \\ K_i &\geq \prod_{j \neq i} \left( 1 - \frac{C_f}{2} t_j^2 \right) \geq 1 - \frac{C_f}{2} \|t\|_2^2 - \left( \frac{C_f}{2} \|t\|_2^2 \right)^3 - \left( \frac{C_f}{2} \|t\|_2^2 \right)^5 - \dots \\ &\geq 1 - \frac{C_f \|t\|_2^2}{2(1 - \frac{C_f}{2} \|t\|_2^2)}. \end{aligned}$$

and hence,

$$\kappa_i'' K_i \leq \left(-C_f + 6C_f^2 \|t\|_2^2\right) \left(1 - \frac{C_f \|t\|_2^2}{2(1 - \frac{C_f}{2} \|t\|_2^2)}\right)$$

For the second term,

$$\sum_j |\kappa_j'|^2 \leq C_f^2 \|t\|_2^2.$$

Therefore,

$$\lambda_{\min}(-K^{(02)}(t)) \geq \left(1 - 6C_f \|t\|_2^2\right) \left(1 - \frac{C_f \|t\|_2^2}{2(1 - \frac{C_f}{2} \|t\|_2^2)}\right) - C_f \|t\|_2^2$$

□

**Lemma F.2.** Assume that  $\frac{1}{8\sqrt{C_f}} \geq \|t\|_2$ . Then,

$$K(t) \leq 1 - \frac{C_f}{4} \|t\|_2^2 + 16C_f^2 \|t\|_2^4.$$

Consequently, for all

$$0 < c \leq \frac{1}{8\sqrt{2C_f}},$$

and all  $t$  such that  $\|t\|_2 \geq c$ ,

$$|K(t)| \leq 1 - \frac{C_f}{8} c^2.$$

*Proof.* First note that

$$|\kappa(u)| \leq 1 - \frac{C_f}{2} u^2 + 32C_f^2 u^4 = 1 - u^2 g(u)$$

where

$$g(u) \stackrel{\text{def.}}{=} C_f \left(\frac{1}{2} - 32C_f u^2\right),$$

and note that  $g(u) \in (0, \frac{C_f}{2})$  for  $u \in (0, 1/(8\sqrt{C_f}))$ . So, writing  $t = (t_i)_{i=1}^d$  and  $g_j \stackrel{\text{def.}}{=} g(t_j)$ , we have

$$\begin{aligned} K(t) &= \prod_{j=1}^d \kappa(t_j) \leq \prod_{j=1}^d (1 - t_j^2 \cdot g(t_j)) \\ &= 1 - \sum_{j=1}^d t_j^2 g_j + \sum_{j \neq k} t_j^2 t_k^2 g_j g_k - \sum_{j \neq k \neq \ell} t_j^2 t_k^2 t_\ell^2 g_j g_k g_\ell + \dots \end{aligned}$$

Note that

$$\begin{aligned} & - \sum_{j \neq k \neq \ell} t_j^2 t_k^2 t_\ell^2 \cdot g_j g_k g_\ell + \sum_{j \neq k \neq \ell \neq n} t_j^2 t_k^2 t_\ell^2 t_n^2 \cdot g_j g_k g_\ell g_n \\ & \leq - \sum_{j \neq k \neq \ell} t_j^2 t_k^2 t_\ell^2 \cdot g_j g_k g_\ell + \left( \sum_{j \neq k \neq \ell} t_j^2 t_k^2 t_\ell^2 \cdot g_j g_k g_\ell \right) \left( \sum_n t_n^2 g_n \right) \\ & \leq - \sum_{j \neq k \neq \ell} t_j^2 t_k^2 t_\ell^2 \cdot g_j g_k g_\ell \left(1 - \frac{C_f}{2} \|t\|_2^2\right) < 0 \end{aligned}$$

since  $\left(1 - \frac{C_f}{2} \|t\|_2^2\right) > 0$ . Also,

$$\sum_{j=1}^d t_j^2 g_j \leq \frac{C_f}{2} \sum_{j=1}^d t_j^2 < 1,$$

by assumption. So,

$$\begin{aligned} K(t) &\leq 1 - \sum_{j=1}^d t_j^2 g_j + \sum_{j \neq k} t_j^2 t_k^2 g_j g_k \\ &\leq 1 - \sum_{j=1}^d t_j^2 g_j + \frac{1}{2} \left( \sum_j t_j^2 g_j \right)^2 \leq 1 - \frac{1}{2} \sum_{j=1}^d t_j^2 g_j \\ &\leq 1 - \frac{C_f}{2} \left( \frac{1}{2} \sum_{j=1}^d t_j^2 - 32C_f \sum_{j=1}^d t_j^4 \right) \leq 1 - \frac{C_f}{4} \|t\|_2^2 + 16C_f^2 \|t\|_2^4. \end{aligned}$$

Finally, observe that the function

$$q(z) \stackrel{\text{def.}}{=} \frac{C_f}{4} z^2 - 16C_f^2 z^4$$

is positive and increasing on the interval  $[0, \frac{1}{8\sqrt{2}C_f}]$ . So, for  $t$  satisfying

$$c \leq \|t\|_2 \leq \frac{1}{8\sqrt{2}C_f}, \quad (\text{F.4})$$

we have  $|K(t)| \leq 1 - q(c) \leq 1 - \frac{C_f}{8} c^2$ . Finally, since  $|K(t)|$  is decreasing as  $t$  increases, we trivially have that  $|K(t)| \leq 1 - q(c)$  for all  $t$  with  $\|t\|_2 \geq c$ .  $\square$

### F.1.5 Bounds under separation

**Lemma F.3.** *Let  $i, j \in \{0, 1, 2\}$  with  $i + j \leq 3$ . Let  $\bar{A} \geq \sqrt{\frac{4\pi^2}{3}}$  and  $\|t\|_2 \geq \bar{A}\sqrt{d}s_{\max}^{1/4}/\sqrt{C_f}$ . Then, we have  $\|K^{(ij)}(t)\| \leq d^{\frac{i+j-4}{2}} (\bar{A}^4 s_{\max})^{-1}$ .*

*Proof.* Write  $t = (t_j)_{j=1}^d$ . To bound  $K(t) = \prod_{j=1}^d \kappa(a_j)$ , we want to make use of the form (F.2). We can do this for each  $t_j$  such that  $|t_j| \geq \sqrt{\frac{2\pi^2}{3C_f}}$ . Note that there exists at least one such  $t_j$  since  $\|t\|_\infty \geq \|t\|_2 / \sqrt{d} \geq \bar{A}s_{\max}^{1/4}/\sqrt{C_f} \geq \sqrt{\frac{2\pi^2}{3C_f}}$ . If  $\{|t_j|\}_{j=1}^k \subset [0, \sqrt{\frac{2\pi^2}{3C_f}})$  for  $k \leq d-1$ , then

$$k \frac{2\pi^2}{3C_f} + \sum_{j=k+1}^d t_j^2 \geq \|t\|_2^2 \geq \frac{\bar{A}^2 d s_{\max}^{1/2}}{C_f},$$

which implies that  $\sum_{j=k+1}^d t_j^2 \geq \frac{1}{C_f} \left( \bar{A}^2 d s_{\max}^{1/2} - \frac{2\pi^2(d-1)}{3} \right) \geq \frac{\bar{A}^2 d s_{\max}^{1/2}}{2C_f}$ , by our assumptions on  $\bar{A}$ . Therefore, we may assume that we have some  $d \geq p \geq 1$  such that  $\{b_j\}_{j=1}^p \subset \{t_j\}$  with  $|b_j| \geq \sqrt{\frac{2\pi^2}{3C_f}}$  and  $\|b\|_2 \geq \frac{\bar{A}\sqrt{d}\sqrt[4]{s_{\max}}}{\sqrt{2C_f}}$ . Observe that

$$\prod_{j=1}^p \left(1 + \frac{3C_f}{2\pi^2} b_j^2\right) \geq 1 + \frac{3C_f}{2\pi^2} \sum_{j=1}^p b_j^2 = 1 + \frac{3C_f}{2\pi^2} \|b\|_2^2 \geq 1 + \frac{3}{4\pi^2} \bar{A}^2 d \sqrt{s_{\max}}.$$

So, by applying the fact that  $|\kappa| \leq 1$ ,  $\kappa_0^\infty = 1$  and (F.2), we have

$$|K(t)| \leq \prod_{j=1}^p |\kappa(b_j)| \leq \prod_{j=1}^p \frac{1}{\left(1 + \frac{3C_f}{2\pi^2} b_j^2\right)^2} \leq \frac{1}{\left(1 + \frac{3}{4\pi^2} \bar{A}^2 d \sqrt{s_{\max}}\right)^2}.$$

For  $|\kappa'_i K_i|$ , if  $i \notin \left\{j; |t_j| > \sqrt{\frac{2\pi^2}{3C_f}}\right\}$ , then

$$|\kappa'_i K_i| \leq \|\kappa'_i\|_\infty \prod_{j=1}^p |\kappa(b_j)| \leq \frac{\|\kappa'_i\|_\infty}{\left(1 + \frac{3}{4\pi^2} \bar{A}^2 d \sqrt{s_{\max}}\right)^2},$$

and otherwise, we have  $|\kappa'_i K_i| \leq |\kappa'(t_i)| \prod_{j \neq i} |\kappa(b_j)| \leq \frac{\kappa_1^\infty}{\left(1 + \frac{3}{4\pi^2} \bar{A}^2 d \sqrt{s_{\max}}\right)^2}$ . In a similar manner, writing  $V \stackrel{\text{def.}}{=} \left(1 + \frac{3}{4\pi^2} \bar{A}^2 d \sqrt{s_{\max}}\right)^{-2}$ , we can deduce that

$$\begin{aligned} |\kappa'_i K_i| &\leq \kappa_1^{\max} V, & |\kappa''_i K_i| &\leq \kappa_2^{\max} V, & |\kappa'_i \kappa'_j K_{ij}|^2 &\leq (\kappa_1^{\max})^2 V \\ |\kappa'''_i K_i|^3 &\leq \kappa_3^{\max} V, & |\kappa''_i \kappa'_j K_{ij}|^3 &\leq \kappa_2^{\max} \kappa_1^{\max} V, & |\kappa'_i \kappa'_j \kappa'_\ell K_{ij\ell}| &\leq (\kappa_1^{\max})^3 V. \end{aligned}$$

Therefore,

$$\|K^{(10)}\| = \frac{1}{\sqrt{C_f}} \|\nabla_1 K\| \leq \frac{1}{\sqrt{C_f}} \sqrt{\sum_{j=1}^d |\kappa'_j K_j|^2} \leq \frac{\kappa_1^\infty}{\sqrt{C_f}} V \sqrt{d} \lesssim \frac{1}{\bar{A}^4 d^{3/2} s_{\max}}.$$

Using Gershgorin theorem, we have

$$\|\nabla_2^2 K(x, x')\| \leq \max_{1 \leq i \leq d} \{|\kappa''_i K_i| + |\kappa'_i| \sum_{j \neq i} |\kappa'_j| |K_{ij}|\}$$

and hence,

$$\begin{aligned} \|K^{(02)}\| &= \frac{1}{C_f} \|\nabla_2^2 K\| \leq \frac{1}{C_f} \max_{i=1}^d \{|\kappa''_i K_i| + |\kappa'_i| \sum_{j \neq i} |\kappa'_j K_{ij}|\} \\ &\leq \frac{1}{C_f} V (\kappa_2^{\max} + (\kappa_1^{\max})^2 (d-1)) \leq \frac{\max\{\kappa_2^\infty, (\kappa_1^\infty)^2\}}{C_f} V d \lesssim \frac{1}{\bar{A}^4 d s_{\max}}. \end{aligned}$$

Note also that  $\|K^{(11)}\| = \|K^{(02)}\|$ . Finally, since

$$\begin{aligned} \|\partial_{1,i} \nabla_2^2 K(x, x')\| &\leq \max \left\{ |\kappa'''_i K_i| + |\kappa''_i| \sum_{j \neq i} |\kappa'_j| |K_{ij}|, \right. \\ &\quad \left. \max_{j \neq i} \{|\kappa''_j \kappa'_i K_{ij}| + |\kappa'_j \kappa''_i K_{ij}| + |\kappa'_i| |\kappa'_j| \sum_{l \neq i, j} |\kappa'_l| |K_{ijl}|\} \right\}, \end{aligned}$$

we have

$$\begin{aligned} \|K^{(12)}\| &= \frac{1}{C_f^{3/2}} \|\nabla_1 \nabla_2^2 K\| \\ &\leq \frac{1}{C_f^{3/2}} \sqrt{d} V \max(\kappa_3^{\max} + \kappa_2^{\max} \kappa_1^{\max} (d-1), 2\kappa_2^{\max} \kappa_1^\infty + (d-1)(\kappa_1^\infty)^3) \\ &\leq d^{3/2} \max\{\kappa_3^\infty, \kappa_1^\infty \kappa_2^\infty, (\kappa_1^\infty)^3\} \frac{1}{C_f^{3/2}} V \lesssim \frac{1}{\bar{A}^4 d^{1/2} s_{\max}} \end{aligned}$$

□

### F.1.6 Uniform bounds

**Lemma F.4.** *If  $r_{\text{near}} \sim 1/\sqrt{C_f}$ , then  $B_0 = \mathcal{O}(1)$ ,  $B_{01} = \mathcal{O}(\sqrt{d})$ ,  $B_{02} = B_{12} = B_{11} = \mathcal{O}(1)$  and  $B_{22} = \mathcal{O}(d)$ .*

*Proof.* We have  $|K| \leq 1$ , and

$$\|\nabla K\|^2 \leq \sum_i |\kappa_i|^2 |K_i|^2 \leq d(\kappa_1^\infty)^2 \lesssim C_f d,$$

so  $B_{01} = \mathcal{O}(\sqrt{d})$ .

From (F.3), for all  $\|q\| = 1$ ,

$$\langle \nabla_2^2 K(t)q, q \rangle \leq \max_i |\kappa_i''| \|q\|_2^2 + \|q\|_2^2 \sum_i |\kappa_i|^2 \leq C_f + C_f^2 \|t\|^2 = \mathcal{O}(C_f),$$

for  $\|t\| \lesssim 1/\sqrt{C_f}$ . So, since  $r_{\text{near}} \leq 2/\sqrt{C_f}$ ,  $\|K^{02}(t)\| \leq 2 \stackrel{\text{def.}}{=} B_{02}$ . The norm bound for  $K^{11}$  is the same.

$$\begin{aligned} \|K^{(12)}\| &= \sup_{\|q\|=\|p\|=1} \frac{1}{C_f^{3/2}} \left( \sum_k \sum_{k \neq i} \partial_{1,i} (\partial_{2,k}^2 K p_i q_k^2 + \partial_{1,i} \partial_{2,i} \partial_{2,k} K p_i q_i q_k) \right. \\ &\quad \left. + \sum_i \sum_k \sum_j \partial_{1,i} \partial_{2,j} \partial_{2,k} p_i p_j p_k + \sum_i \sum_{j \neq i} \partial_{1,i} \partial_{2,i} \partial_{2,j} K p_i q_i q_j + \sum_i \partial_{1,i} \partial_{2,j}^2 K p_i q_i^2 \right) \\ &= \sup_{\|q\|=\|p\|=1} \frac{1}{C_f^{3/2}} \left( \sum_k \sum_{k \neq i} \kappa_i' \kappa_k'' K_{ik} p_i q_k^2 + \kappa_i'' \kappa_k' K_{ik} p_i q_i q_k \right. \\ &\quad \left. + \sum_i \sum_k \sum_j \kappa_i' \kappa_k' \kappa_j' K_{ijk} p_i p_j p_k + \sum_i \sum_{j \neq i} \kappa_i'' \kappa_j' K_{ij} p_i q_i q_j + \sum_i \kappa_i' \kappa_j'' K_{ij} p_i q_i^2 \right) \\ &\leq \frac{1}{C_f^{3/2}} \left( 3 \|\kappa''\|_\infty \sqrt{\sum_i |\kappa_k'|^2} + \left( \sum_i |\kappa_k'|^2 \right)^{3/2} + \|\kappa'\|_\infty \|\kappa''\|_\infty \right) \\ &\leq \frac{1}{C_f^{3/2}} \left( 3C_f^2 \|t\| + C_f^3 \|t\|^3 + \mathcal{O}(C_f^{3/2}) \right) = \mathcal{O}(1) \end{aligned}$$

for  $\|t\| \leq 1/C_f^{1/2}$ .

We finally consider  $K^{(22)}(x, x)$ : for  $\|p\| = 1$ ,

$$\begin{aligned} \sum_i \sum_k \sum_j \partial_{1,k} \partial_{1,i} \partial_{2,j} \partial_{2,i} K p_j p_k &= \sum_i \sum_{k \neq i} \kappa_i'' \kappa_k'' p_j^2 K_{ik} + \sum_i \sum_{k \neq i} \kappa_i''' \kappa_k' p_i p_k K_{ik} \\ &\quad + \sum_i \sum_k \sum_j \kappa_i'' \kappa_j' \kappa_k' K_{ijk} p_j p_k + \sum_i \sum_j \kappa_i''' \kappa_j' p_j p_i K_{ij} + \sum_i \kappa_i'''' p_i^2 K_i \\ &= \sum_i \sum_{k \neq i} \kappa_i'' \kappa_k'' p_j^2 K_{ik} + \sum_i \kappa_i'''' p_i^2 \\ &= d\mathcal{O}(C_f^2) \end{aligned}$$

since  $\kappa'(0) = \kappa'''(0) = 0$  and  $|\kappa''(0)| = \mathcal{O}(C_f)$ ,  $|\kappa''''(0)| = \mathcal{O}(C_f^2)$ . So,  $B_{22} = \mathcal{O}(d)$ .  $\square$

## F.2 The Gaussian kernel

We consider the Gaussian kernel  $K(x, x') = \exp\left(-\frac{1}{2}\|x - x'\|_{\Sigma^{-1}}^2\right)$  in  $\mathbb{R}^d$ . Note that  $K$  is translation invariant, so that  $\mathbf{H}_x$  will be constant and equal to  $-\nabla^2 K(x, x)$ . For simplicity define  $t = x - x'$ ,  $\hat{K}_\Sigma(t) = \exp\left(-\frac{1}{2}\|t\|_{\Sigma^{-1}}^2\right)$  and for  $u \in \mathbb{R}$ ,  $\kappa(u) = \exp\left(-\frac{1}{2}u^2\right)$ . Denote by  $\{e_i\}$  the canonical basis of  $\mathbb{R}^d$ , and by  $f_i = \Sigma^{-1}e_i$  the  $i^{\text{th}}$  row of  $\Sigma^{-1}$ . We have the following:

$$\begin{aligned}\nabla \hat{K}_\Sigma(t) &= -\Sigma^{-1}t \hat{K}_\Sigma(t) \\ \nabla^2 \hat{K}_\Sigma(t) &= (-\Sigma^{-1} + \Sigma^{-1}t t^\top \Sigma^{-1}) \hat{K}_\Sigma(t) \\ \partial_{1,i} \nabla^2 \hat{K}_\Sigma(t) &= (\Sigma^{-1}t f_i^\top + f_i t^\top \Sigma^{-1} - (-\Sigma^{-1} + \Sigma^{-1}t t^\top \Sigma^{-1})(t^\top f_i)) \hat{K}_\Sigma(t)\end{aligned}$$

Hence we have  $\mathbf{H}_x = -\nabla^2 \hat{K}_\Sigma(0) = \Sigma^{-1}$ , and, defining  $d_{\mathbf{H}}(x, x') = \|x - x'\|_{\Sigma^{-1}} = \left\| \Sigma^{-\frac{1}{2}}(x - x') \right\|$ , we have  $C_{\hat{K}} = 1, C_{\mathbf{H}} = 0$  (that is, the metric tensor of the kernel is constant, and  $d_{\mathbf{H}}$  is defined as the corresponding normalized norm).

Then, we have

$$\begin{aligned}\left\| K^{(10)}(x, x') \right\| &= \left\| K^{(01)}(x, x') \right\| = d_{\mathbf{H}}(x, x') \kappa(d_{\mathbf{H}}(x, x')) \\ \left\| K^{(02)}(x, x') \right\| &= \left\| K^{(11)}(x, x') \right\| \leq (d_{\mathbf{H}}(x, x')^2 + 1) \kappa(d_{\mathbf{H}}(x, x')) \\ K^{(02)}(x, x') &\preceq (d_{\mathbf{H}}(x, x')^2 - 1) \kappa(d_{\mathbf{H}}(x, x')) \text{Id}\end{aligned}$$

and for  $q \in \mathbb{R}^d$  with  $\|q\| = 1$ , since

$$\sum_i (\Sigma^{\frac{1}{2}} \nabla \varphi_\omega)_i q_i = \nabla \varphi_\omega^\top (\Sigma^{\frac{1}{2}} q) = \sum_i \partial_i \varphi_\omega (q^\top \Sigma^{\frac{1}{2}} e_i)$$

we can write

$$K^{(12)}(x, x') q = \sum_{i=1}^d (q^\top \Sigma^{\frac{1}{2}} e_i) \Sigma^{\frac{1}{2}} \partial_{1,i} \nabla^2 \hat{K}_\Sigma(t) \Sigma^{\frac{1}{2}}$$

Thus we examine each term in  $\partial_{1,i} \nabla^2 \hat{K}_\Sigma$ . We have

$$\sum_i (q^\top \Sigma^{\frac{1}{2}} e_i) \Sigma^{\frac{1}{2}} \Sigma^{-1} t f_i^\top \Sigma^{\frac{1}{2}} = \Sigma^{-\frac{1}{2}} t \left( \sum_i q^\top \Sigma^{\frac{1}{2}} e_i e_i^\top \Sigma^{-\frac{1}{2}} \right) = \Sigma^{-\frac{1}{2}} t q^\top$$

and similarly  $\sum_i (q^\top \Sigma^{\frac{1}{2}} e_i) \Sigma^{\frac{1}{2}} f_i t^\top \Sigma^{-1} \Sigma^{\frac{1}{2}} = q t^\top \Sigma^{\frac{1}{2}}$ . Then

$$\sum_i (q^\top \Sigma^{\frac{1}{2}} e_i) (t^\top \Sigma^{-1} e_i) \Sigma^{\frac{1}{2}} \Sigma^{-1} \Sigma^{\frac{1}{2}} = t^\top \Sigma^{-1} \left( \sum_i e_i e_i^\top \right) \Sigma^{\frac{1}{2}} q = (t^\top \Sigma^{\frac{1}{2}} q) \text{Id}$$

and similarly  $\sum_i \sum_i (q^\top \Sigma^{\frac{1}{2}} e_i) (t^\top \Sigma^{-1} e_i) \Sigma^{\frac{1}{2}} \Sigma^{-1} t t^\top \Sigma^{-1} \Sigma^{\frac{1}{2}} = (t^\top \Sigma^{\frac{1}{2}} q) \Sigma^{-\frac{1}{2}} t t^\top \Sigma^{-\frac{1}{2}}$ .

Hence at the end of the day

$$\left\| K^{(12)}(x, x') \right\| \leq (3d_{\mathbf{H}}(x, x') + d_{\mathbf{H}}(x, x')^3) \kappa(d_{\mathbf{H}}(x, x'))$$

and this bound is automatically valid for  $K^{(21)}$  as well.

Finally, note that

$$\left\| K^{(22)}(x, x) \right\| = \sup_{\|p\| \leq 1} \langle \Sigma^{1/2} \nabla_2 \nabla_2 \cdot (\Sigma^{1/2} K^{(2,0)}(x, x) p), p \rangle$$



where  $\nabla_2 \cdot$  is the divergence operator on the 2nd variable, and one can show that  $\|K^{(22)}(x, x)\| = (d+1)$ .

We are then going to use the fact that for any  $q \geq 1$  the function  $f(r) = r^q e^{-\frac{1}{2}r^2}$  defined on  $\mathbb{R}_+$  is increasing on  $[0, \sqrt{q}]$  and decreasing after, and its maximum value is  $f(\sqrt{q}) = \left(\frac{q}{e}\right)^{q/2}$ . Furthermore, it is easy to see that we have  $f(r) = r^q e^{-r^2/2} \leq \left(\frac{2q}{e}\right)^{\frac{q}{2}} e^{-r^2/4}$  and therefore  $f(r) \leq \varepsilon$  if  $r \geq 2 \left(\log\left(\frac{1}{\varepsilon}\right) + \frac{q}{2} \log\left(\frac{2q}{e}\right)\right)$ .

We define  $r_{\text{near}} = 1/\sqrt{2}$  and  $\Delta = C_1 \sqrt{\log(s_{\text{max}})} + C_2$  for some  $C_1$  and  $C_2$ .

1. *Global Bounds.* From what precedes, we have

$$\|K^{(10)}\| \leq \frac{1}{\sqrt{e}}, \quad \|K^{(02)}\| \leq \frac{2}{e} + 1, \quad \|K^{(12)}\| \leq \frac{3}{\sqrt{e}} + \left(\frac{3}{e}\right)^{\frac{3}{2}}$$

and note that  $\|K^{(11)}\| = \|K^{(02)}\|$ , so for all  $i+j \leq 3$   $B_{ij} = \mathcal{O}(1)$ .

2. *Near 0* For  $d_{\mathbf{H}}(x, x') \leq r_{\text{near}}$ , we have

$$K^{(02)} \preceq -\frac{e^{-\frac{1}{4}}}{2} \text{Id}$$

and for  $d_{\mathbf{H}}(x, x') \geq \frac{1}{2}$ ,

$$|K| \leq e^{-\frac{1}{4}} = 1 - (1 - e^{-\frac{1}{4}})$$

and  $\|K^{(22)}(x, x)\| = d+1$ , so we have also  $\varepsilon_i = \mathcal{O}(1)$ , so  $B_i = B_{0i} + B_{1i} + 1 = \mathcal{O}(1)$  and  $B_{22} = d+1$ .

3. *Separation.* Since  $\varepsilon_i = \mathcal{O}(1)$  and  $B_{ij} = \mathcal{O}(1)$ , every condition  $\|K^{(ij)}\| \lesssim \frac{1}{s_{\text{max}}}$  is satisfied if  $\Delta \geq C_1 \sqrt{\log(s_{\text{max}})} + C_2$  for some constant  $C_1$  and  $C_2$ .

## F.2.1 Fourier measurements with Gaussian frequencies

The random feature expansion for  $K$  is  $\varphi_\omega(x) = e^{i\omega^\top x}$  and  $\Lambda = \mathcal{N}(0, \Sigma^{-1})$ . We have immediately  $L_0 = 1$ . For  $j \geq 1$ , we have  $D_j[\varphi_\omega](x)[q_1, \dots, q_j] = \left(\prod_i \omega^\top (\Sigma^{\frac{1}{2}} q_i)\right) \varphi_\omega(x)$  and therefore

$$\|D_j[\varphi_\omega]\| \leq \|\omega\|_\Sigma^j$$

Now, we use  $\|\omega\|_\Sigma^j = \left(\|\Sigma^{\frac{1}{2}} \omega\|\right)^j = W^{\frac{j}{2}}$  where  $W$  is a  $\chi^2$  variable with  $d$  degrees of freedom. Then, we use the following Chernoff bound [3]: for  $x \geq d$ , we have

$$\mathbb{P}(W \geq x) \leq \left(\frac{ex}{d} e^{-\frac{x}{d}}\right)^{\frac{d}{2}} \leq \left(e \left(\sqrt{\frac{x}{d}}\right)^2 e^{-\frac{1}{2} \cdot (\sqrt{\frac{x}{d}})^2} e^{-\frac{x}{2d}}\right)^{\frac{d}{2}} \leq 2^{\frac{d}{2}} e^{-\frac{x}{4}}$$

by using  $x^2 e^{-\frac{x^2}{2}} \leq \frac{2}{e}$ .

Hence we can define the  $F_j$  such that, for all  $t \geq d^{j/2}$ ,  $\mathbb{P}(L_j(\omega) \geq t) \leq F_j(t) = 2^{\frac{d}{2}} \exp\left(-\frac{t^2}{4}\right)$ , and  $F_j(\bar{L}_j)$  is smaller than some  $\delta$  if  $\bar{L}_j \propto (d + \log \frac{1}{\delta})^{\frac{j}{2}}$ . Then we must choose the  $L_j$  such that  $\int_{L_j} t F_j(t) dt$  is bounded by some  $\delta$ . Taking  $L_j \geq d^{j/2}$  in any case, we have

$$\begin{aligned} \int_{L_j} t F_j(t) dt &= 2^{\frac{d}{2}} \int_{L_j} t \exp\left(-\frac{t^2}{4}\right) dt = 2^{\frac{d}{2}} \int_{L_j^{\frac{2}{j}}} (j/2) t^{j-1} \exp\left(-\frac{t}{4}\right) dt \\ &= 2^{\frac{d}{2}} (j/2) \int_{L_j^{\frac{2}{j}}} \left(t^{j-1} \exp\left(-\frac{t}{8}\right)\right) \exp\left(-\frac{t}{8}\right) dt \leq 2^{\frac{d}{2}} (j/2) \left(\frac{8(j-1)}{e}\right)^{j-1} \int_{L_j^{\frac{2}{j}}} \exp\left(-\frac{t}{8}\right) dt \\ &= 2^{\frac{d}{2}} j \left(\frac{8(j-1)}{e}\right)^{j-1} 8 \exp\left(-\frac{L_j^{\frac{2}{j}}}{8}\right) \end{aligned}$$

Hence this quantity is bounded by  $\delta$  if  $\bar{L}_j \propto (d + \log(\frac{1}{\delta}))^{\frac{j}{2}}$ . Then we have  $\bar{L}_j^2 F_i(\bar{L}_i) = \bar{L}_j^2 2^{\frac{d}{2}} \exp\left(-\frac{\bar{L}_i^2}{4}\right)$  which is also bounded by  $\delta$  if  $\bar{L}_j \propto \left(d + \left(\log \frac{d}{\delta}\right)^2\right)^{\frac{j}{2}}$ . At the end of the day, our assumptions are satisfied for

$$\bar{L}_j \propto \left(d + \left(\log \frac{dm}{\rho}\right)^2\right)^{\frac{j}{2}}$$

## F.2.2 Gaussian mixture model learning

We apply the mixture model framework with the base distribution:

$$P_\theta = \mathcal{N}(\theta, \Sigma)$$

The random features on the data space are  $\varphi'_\omega(x) = C e^{i\omega^\top x}$  with Gaussian distribution  $\omega \sim \Lambda = \mathcal{N}(0, A)$  for some constant  $C$  and matrix  $A$ . Then, the features on the parameter space are  $\varphi_\omega(\theta) = \mathbb{E}_{x \sim P_\theta} \varphi'_\omega(x) = C e^{i\omega^\top \theta} e^{-\frac{1}{2}\|\omega\|_\Sigma^2}$  (that is, the characteristic function of Gaussians). Then, it is possible to show [5] that the kernel is

$$K(\theta, \theta') = C^2 \frac{|A^{-1}|^{\frac{1}{2}}}{|2\Sigma + A^{-1}|^{\frac{1}{2}}} e^{-\frac{1}{2}\|\theta - \theta'\|_{(2\Sigma + A^{-1})}^2}$$

Hence we choose  $A = c\Sigma^{-1}$ ,  $C = (1+2c)^{\frac{d}{4}}$ , and we come back to the previous case  $K(\theta, \theta') = e^{-\frac{1}{2}\|\theta - \theta'\|_{\tilde{\Sigma}^{-1}}^2}$  with covariance  $\tilde{\Sigma} = (2+1/c)\Sigma$ . Hence  $\varepsilon_i = \mathcal{O}(1)$ ,  $B_{ij} = \mathcal{O}(1)$ ,  $d_{\mathbf{H}}(\theta, \theta') = \|\theta - \theta'\|_{\tilde{\Sigma}^{-1}} = \frac{1}{\sqrt{2+1/c}} \|\theta - \theta'\|_{\Sigma^{-1}}$ .

**Admissible features.** Unlike the previous case, the features are directly bounded and Lipschitz. We have

$$|\varphi_\omega(\theta)| \leq C \stackrel{\text{def}}{=} L_0,$$

$$\|\mathbf{D}_j[\varphi_\omega(\theta)]\| = C \left\| \tilde{\Sigma}^{\frac{1}{2}} \omega \right\|^j e^{-\frac{\|\omega\|_{\tilde{\Sigma}}^2}{2}} = C (2+1/c)^{\frac{j}{2}} \left\| \Sigma^{\frac{1}{2}} \omega \right\|^j e^{-\frac{\|\omega\|_{\tilde{\Sigma}}^2}{2}} \leq C (2+1/c)^{\frac{j}{2}} \left(\frac{j}{e}\right)^{\frac{j}{2}} \stackrel{\text{def}}{=} L_j$$

Hence all constants  $L_j$  are in  $\mathcal{O}\left(C(2+1/c)^{\frac{j}{2}}\right)$  by choosing  $c = \frac{1}{d}$  they are in  $\mathcal{O}\left(d^{\frac{j}{2}}\right)$ .

## F.3 The Laplace transform kernel

Let  $\alpha \in \mathbb{R}_+^d$  and let  $\mathcal{X} \subset \mathbb{R}_+^d$  be a compact domain. Define for  $x \in \mathcal{X}$  and  $\omega \in \mathbb{R}_+^d$ ,

$$\varphi_\omega(x) \stackrel{\text{def}}{=} \exp(-\langle x, \omega \rangle) \prod_{i=1}^d \sqrt{\frac{(x_i + \alpha_i)}{\alpha_i}} \quad \text{and} \quad \Lambda(\omega) \stackrel{\text{def}}{=} \exp(-\langle 2\alpha, \omega \rangle) \prod_{i=1}^d (2\alpha_i),$$

The associated kernel is  $K(x, x') = \prod_{i=1}^d \kappa(x_i + \alpha_i, x'_i + \alpha_i)$  where  $\kappa$  is the 1D Laplace kernel

$$\kappa(u, v) \stackrel{\text{def}}{=} 2 \frac{\sqrt{uv}}{(u+v)}.$$

A direct computation shows that  $\mathbf{H}_x \in \mathbb{R}^{d \times d}$  is the diagonal matrix with  $(h_{x_i + \alpha_i})_{i=1}^d$  where  $h_x \stackrel{\text{def}}{=} \partial_x \partial_{x'} \kappa(x, x) = (2x)^{-2}$ . Note that

$$d_\kappa(s, t) = \int_{\min\{s, t\}}^{\max\{s, t\}} (2x + 2\alpha)^{-1} dx = \left| \log \left( \frac{t + \alpha}{s + \alpha} \right) \right| \quad (\text{F.5})$$

and so,  $d_{\mathbf{H}}(x, x') = \sqrt{\sum_{i=1}^d \left| \log \left( \frac{x_i + \alpha_i}{x'_i + \alpha_i} \right) \right|^2}$ .

We have the following results concerning the boundedness of  $\|\mathbf{D}_j[\varphi_\omega]\|$  and the admissibility of  $K$ :

**Theorem F.2** (Stochastic gradient bounds). *Assume that the  $\alpha_i$ 's are all distinct. Then,  $\bar{L}_0(\omega) \leq \bar{L}_0 \stackrel{\text{def.}}{=} \left(1 + \frac{R_{\mathcal{X}}}{\min_i \alpha_i}\right)^d$  and for  $j = 1, 2, 3$ ,*

$$\mathbb{P}(L_j(\omega) \geq t) \leq F_j(t) \stackrel{\text{def.}}{=} \sum_{i=1}^d \beta_i \exp\left(-\alpha_i \left(\frac{1}{2(R_{\mathcal{X}} + \|\alpha\|_{\infty})} \left(\frac{t}{\bar{L}_0}\right)^{1/j} - \sqrt{d}\right)\right)$$

and we have that  $\sum_i F_j(\bar{L}_j) \leq \delta$  and  $\bar{L}_j^2 \sum_i F_i(\bar{L}_i) + 2 \int_{\bar{L}_j}^{\infty} t F_j(t) dt \leq \delta$  provided that

$$\bar{L}_j \propto \bar{L}_0(R_{\mathcal{X}} + \|\alpha\|_{\infty})^j \left(\sqrt{d} + \max_i \frac{1}{\alpha_i} \log\left(\frac{d\beta_i \bar{L}_0(R_{\mathcal{X}} + \|\alpha\|_{\infty})}{\delta \alpha_i}\right)\right)^j.$$

where  $\beta_i = \prod_{j \neq i} \frac{\alpha_j}{\alpha_j - \alpha_i}$ . Note that  $\alpha_i \sim d$  implies that  $\bar{L}_0 \sim (1 + R_{\mathcal{X}}/d)^d \sim e^{R_{\mathcal{X}}}$ .

**Theorem F.3** (Admissibility of  $K$ ). *The Laplace transform kernel  $K$  is admissible with  $r_{\text{near}} = 0.2$ ,  $C_{\mathbf{H}} = 1.25$ ,  $\varepsilon_0 = 0.005$ ,  $\varepsilon_2 = 1.52$ . For all  $i + j \leq 3$ ,  $B_{ij} = \mathcal{O}(1)$ ,  $B_{22} = \mathcal{O}(d)$ ,  $\Delta = \mathcal{O}(d + \log(d^{3/2} s_{\text{max}}))$  and  $h = \mathcal{O}(1)$ .*

The first result Theorem F.2 is proved in Section F.3.1 and the second result, Theorem F.4 is a direct consequence of Theorem F.4 and Lemma F.5 in Section F.3.2.

### F.3.1 Stochastic gradient bounds

*Proof of Theorem F.2.* Let  $V \stackrel{\text{def.}}{=} (1 - 2(x_i + \alpha_i)\omega_i)_{i=1}^d \in \mathbb{R}^d$ . Then,

$$\begin{aligned} \|V\| &= \sqrt{\sum_i (1 - 2(x_i + \alpha_i)\omega_i)^2} \\ &\leq \sqrt{\sum_i 1 + 4(x_i + \alpha_i)^2 \omega_i^2} \leq \sqrt{d + 4(R_{\mathcal{X}} + \|\alpha\|_{\infty})^2 \|w\|^2} \\ &\leq \sqrt{d} + 2(R_{\mathcal{X}} + \|\alpha\|_{\infty}) \|w\| \end{aligned}$$

We have the following bounds:

$$\begin{aligned} |\varphi_{\omega}(x)| &\leq \prod_{i=1}^d \sqrt{1 + \frac{x_i}{\alpha_i}} \leq \left(1 + \frac{R_{\mathcal{X}}}{\min_i \alpha_i}\right)^d \stackrel{\text{def.}}{=} \bar{L}_0, \\ \mathbf{D}_1[\varphi_{\omega}](x) = \varphi_{\omega}(x)V &\implies \|\mathbf{D}_1[\varphi_{\omega}](x)\| \leq \bar{L}_0 \|V\| \\ \mathbf{D}_2[\varphi_{\omega}](x) = \varphi_{\omega}(x)(VV^{\top} - 2\text{Id}) &\implies \|\mathbf{D}_2[\varphi_{\omega}](x)\| \leq \bar{L}_0 \min\{\|V\|^2, 2\}. \end{aligned}$$

and given  $u, q \in \mathbb{R}^d$ ,

$$\mathbf{D}_3[\varphi_{\omega}](x)[q, q, u] = \varphi_{\omega}(x) \left( \langle u, V \rangle \langle q, V \rangle^2 - 2\|q\|^2 - 4\langle u, q \rangle \langle q, V \rangle + 8 \sum_i q_i^2 u_i \right),$$

so

$$\|\mathbf{D}_3[\varphi_{\omega}](x)\| \leq |\varphi_{\omega}(x)| \left( \|V\|^3 + 10 + 4\|V\| \right) \leq \bar{L}_0 5(\|V\|^3 + 3),$$

And therefore, in general,

$$\|\mathbf{D}_j[\varphi_{\omega}](x)\| \leq L_j(\omega) \stackrel{\text{def.}}{=} \bar{R}_{\mathcal{X}}^{j+1} \left(\sqrt{d} + \|\omega\|\right)^j$$

$$\|\mathbf{D}_j[\varphi_\omega](x)\| \lesssim L_j(\omega) \stackrel{\text{def.}}{=} \bar{L}_0 \left( \sqrt{d} + 2(R_{\mathcal{X}} + \|\alpha\|_\infty) \|w\| \right)^j$$

Assuming for simplicity that all  $\alpha_j$  are distinct, we have [1]:

$$\mathbb{P}(\|w\| \geq t) \leq \mathbb{P}(\|\omega\|_1 \geq t) = \sum_{i=1}^d \beta_i e^{-\alpha_i t}$$

where  $\beta_i = \prod_{j \neq i} \frac{\alpha_j}{\alpha_j - \alpha_i}$ , using the fact that  $\|\omega\|_1$  is a sum of independent exponential random variable.

Hence, for all  $1 \leq j \leq 3$  and  $t \geq d^{\frac{1}{2}}$  we have

$$\begin{aligned} \mathbb{P}(L_j(\omega) \geq t) &\leq \mathbb{P}\left(\|w\| \geq \frac{1}{2(R_{\mathcal{X}} + \|\alpha\|_\infty)} \left(\frac{t}{\bar{L}_0}\right)^{1/j} - \sqrt{d}\right) \\ &\leq F_j(t) \stackrel{\text{def.}}{=} \sum_{i=1}^d \beta_i \exp\left(-\alpha_i \left(\frac{1}{2(R_{\mathcal{X}} + \|\alpha\|_\infty)} \left(\frac{t}{\bar{L}_0}\right)^{1/j} - \sqrt{d}\right)\right) \leq \delta \end{aligned}$$

and  $F_j(\bar{L}_j) \leq \delta$  if

$$\bar{L}_j \geq \bar{L}_0 \left( 2^j (R_{\mathcal{X}} + \|\alpha\|_\infty)^j \left( \sqrt{d} + \max_i \frac{1}{\alpha_i} \log\left(\frac{d\beta_i}{\delta}\right) \right)^j \right)$$

Next, in a similar manner to the Gaussian case, we compute

$$\begin{aligned} \int_{\bar{L}_j} t F_j(t) dt &= \sum_{i=1}^d \beta_i \int_{\bar{L}_j} t \exp\left(-\alpha_i \left(\frac{1}{2(R_{\mathcal{X}} + \|\alpha\|_\infty)} \left(\frac{t}{\bar{L}_0}\right)^{1/j} - \sqrt{d}\right)\right) dt \\ &= \bar{L}_0^2 j \sum_{i=1}^d e^{\alpha_i \sqrt{d}} \beta_i \int_{(\bar{L}_j/\bar{L}_0)^{1/j}} \exp\left(\frac{-\alpha_i u}{2(R_{\mathcal{X}} + \|\alpha\|_\infty)}\right) u^{2j-1} du \\ &\leq \left(\frac{(2j-1)4(R_{\mathcal{X}} + \|\alpha\|_\infty)}{e\alpha_i}\right)^{2j-1} \bar{L}_0^2 j \sum_{i=1}^d e^{\alpha_i \sqrt{d}} \beta_i \int_{(\bar{L}_j/\bar{L}_0)^{1/j}} \exp\left(\frac{-\alpha_i u}{4(R_{\mathcal{X}} + \|\alpha\|_\infty)}\right) du \\ &\leq \left(\frac{4(R_{\mathcal{X}} + \|\alpha\|_\infty)}{\alpha_i}\right)^{2j} \left(\frac{2j-1}{e}\right)^{2j-1} \bar{L}_0^2 j \sum_{i=1}^d e^{\alpha_i \sqrt{d}} \beta_i \exp\left(\frac{-\alpha_i (\bar{L}_j/\bar{L}_0)^{1/j}}{4(R_{\mathcal{X}} + \|\alpha\|_\infty)}\right) \leq \delta \end{aligned}$$

if for all  $i = 1, \dots, d$ ,

$$\frac{4(R_{\mathcal{X}} + \|\alpha\|_\infty)}{\alpha_i} \left( 2j \log\left(\frac{4(2j-1)(R_{\mathcal{X}} + \|\alpha\|_\infty)}{e\alpha_i}\right) + \log(\bar{L}_0^2 j) + \alpha_i \sqrt{d} + \log\left(\frac{d\beta_i}{\delta}\right) \right) \leq \left(\frac{\bar{L}_j}{\bar{L}_0}\right)^{1/j}$$

that is,

$$\bar{L}_j \gtrsim \bar{L}_0 \left( 2^j (R_{\mathcal{X}} + \|\alpha\|_\infty)^j \left( \sqrt{d} + \max_i \frac{1}{\alpha_i} \log\left(\frac{d\beta_i}{\delta}\right) \right)^j \right).$$

It remains to bound  $\bar{L}_j F_\ell(\bar{L}_\ell)$  with  $\ell, j \in \{0, 1, 2, 3\}$ : Let  $\bar{L}_\ell \geq \bar{L}_0 M^\ell$  for some  $M$  to be determined. Then,

$$\begin{aligned} \bar{L}_j F_\ell(\bar{L}_\ell) &\leq \bar{L}_0 M^j \sum_{i=1}^d \beta_i \exp\left(\frac{-\alpha_i}{2(R_{\mathcal{X}} + \|\alpha\|_\infty)} M + \alpha_i \sqrt{d}\right) \\ &= \bar{L}_0 \sum_{i=1}^d \beta_i M^j \exp\left(\frac{-\alpha_i}{4(R_{\mathcal{X}} + \|\alpha\|_\infty)} M\right) \exp\left(\frac{-\alpha_i}{4(R_{\mathcal{X}} + \|\alpha\|_\infty)} M\right) e^{\alpha_i \sqrt{d}} \\ &\leq \bar{L}_0 e^{-j} \sum_{i=1}^d \left(\frac{4j(R_{\mathcal{X}} + \|\alpha\|_\infty)}{\alpha_i}\right)^j \beta_i \exp\left(\frac{-\alpha_i}{4(R_{\mathcal{X}} + \|\alpha\|_\infty)} M\right) e^{\alpha_i \sqrt{d}} \\ &\leq \bar{L}_0 e^{-3} \sum_{i=1}^d \left(\frac{12(R_{\mathcal{X}} + \|\alpha\|_\infty)}{\alpha_i}\right)^3 \beta_i \exp\left(\frac{-\alpha_i}{4(R_{\mathcal{X}} + \|\alpha\|_\infty)} M\right) e^{\alpha_i \sqrt{d}} \leq \delta \end{aligned}$$

if for each  $i = 1, \dots, d$

$$M \geq 4(R_{\mathcal{X}} + \|\alpha\|_\infty) \left( \sqrt{d} + \max_i \frac{1}{\alpha_i} \log \left( \frac{\bar{L}_0 d \beta_i}{\delta e^3} \left( \frac{12(R_{\mathcal{X}} + \|\alpha\|_\infty)}{\alpha_i} \right)^3 \right) \right).$$

Therefore, similar to the Gaussian case, the conclusion follows for  $\bar{L}_0 = \left(1 + \frac{R_{\mathcal{X}}}{\min_i \alpha_i}\right)^d$ , and for  $j = 1, 2, 3$ ,

$$\bar{L}_j \propto \bar{L}_0 (R_{\mathcal{X}} + \|\alpha\|_\infty)^j \left( \sqrt{d} + \max_i \frac{1}{\alpha_i} \log \left( \frac{d \beta_i \bar{L}_0 (R_{\mathcal{X}} + \|\alpha\|_\infty)}{\delta \alpha_i} \right) \right)^j.$$

□

### F.3.2 Admissibility of the kernel

**Metric variation** We have the following lemma on the variation of the Fisher metric:

**Lemma F.5.** *Suppose that  $d_{\mathbf{H}}(x, x') \leq c$ , then  $\|\text{Id} - \mathbf{H}_x^{1/2} \mathbf{H}_{x'}\| \leq (1 + ce^c) d_{\mathbf{H}}(x, x')$ .*

*Proof.* Note that  $|1 - |(x_i + \alpha_i)/(x'_i + \alpha_i)|| \leq \max\{e^{d_\kappa(x_i, x'_i)} - 1, 1 - e^{-d_\kappa(x_i, x'_i)}\} \leq d_\kappa(x_i, x'_i)(1 + ce^c)$  for all  $d_\kappa(x_i, x'_i) \leq c$ . Therefore,

$$\|\text{Id} - \mathbf{H}_x \mathbf{H}_{x'}\|^2 = \sum_i |1 - |(x_i + \alpha_i)/(x'_i + \alpha_i)||^2 \leq (1 + ce^c) d_{\mathbf{H}}(x, x')$$

provided that  $d_{\mathbf{H}}(x, x') \leq c$ .

□

**Admissibility of the kernel** The following theorem provides bounds for  $K$  and its normalised derivatives.

**Theorem F.4.** 1.  $|K(x, x')| \leq \min\{2^d e^{-\frac{1}{2} d_{\mathbf{H}}(x, x')}, \frac{8}{8 + d_{\mathbf{H}}(x, x')^2}\}$ .

2.  $\|K^{(10)}(x, x')\| \leq \min\{2\sqrt{d} |K|, \sqrt{2}\}$ .

3.  $\|K^{(11)}\| \leq \min\{9d |K|, 8\}$

4.  $\|K^{(20)}\| \leq \min\{10d |K|, 8\}$  and  $\lambda_{\min}(-K^{(20)}) \geq (2 - 12d_{\mathbf{H}}(x, x')^2) K$ .

5.  $\|K^{(12)}\| \leq \min\{66 |K| d^{3/2}, 16\sqrt{d} + 49\}$  and  $\|K^{(12)}(x, x')\| \leq 34$  if  $d_{\mathbf{H}}(x, x') \leq 1$ .

6.  $\|K^{(22)}\| \leq 16d + 9$ .

In particular, for  $d_{\mathbf{H}}(x, x') \geq 2d \log(2) + 2 \log\left(\frac{52d^{3/2} s_{\max}}{h}\right)$ , we have  $\|K^{(ij)}(x, x')\| \leq \frac{h}{s_{\max}}$ .

To prove this result, we first present some bounds for the univariate Laplace kernel in Section F.3.3 before applying these bounds in Section F.3.4.

### F.3.3 1D Laplace kernel

In the following  $\kappa^{(ij)}(x, x') \stackrel{\text{def.}}{=} h_x^{-i/2} h_{x'}^{-j/2} \partial_x^i \partial_{x'}^j \kappa(x, x')$ .

**Lemma F.6.** *We have*

$$(i) \quad \kappa(x, x') = \operatorname{sech}\left(\frac{d_\kappa(x, x')}{2}\right) \leq 2e^{-\frac{1}{2}d_\kappa(x, x')},$$

$$(ii) \quad |\kappa^{(10)}(x, x')| = 2 \left| \tanh\left(\frac{d_\kappa(x, x')}{2}\right) \kappa(x, x') \right|, \text{ and } |\kappa^{(10)}| \leq 2|\kappa|.$$

$$(iii) \quad |\kappa^{(11)}| \leq 4|\kappa|^3 + 4|\kappa|$$

$$(iv) \quad |\kappa^{(20)}| \leq 6|\kappa| \text{ and } -\kappa^{(20)} \geq 2\kappa(x, x') \left(1 - 2 \tanh\left(\frac{d_\kappa(x, x')}{2}\right)\right).$$

$$(v) \quad |\kappa^{(12)}| \leq 49|\kappa|.$$

$$(vi) \quad \kappa^{(22)}(x, x) = 9 \text{ for all } x.$$

*Proof.* We first state the partial derivatives of  $\kappa$ :

$$\begin{aligned} \kappa(x, x') &= \frac{2\sqrt{xx'}}{x+x'}, \\ \partial_x \kappa(x, x') &= \frac{x'(x'-x)}{\sqrt{xx'}(x+x')^2} \\ \partial_x \partial_{x'} \kappa(x, x') &= \frac{-x^2 + 6xx' - (x')^2}{2\sqrt{xx'}(x+x')^3} \\ \partial_x^2 \kappa(x, x') &= -\frac{(x')^2((x+x')^2 + 4x(x'-x))}{2(xx')^{3/2}(x+x')^3} \\ &= -\frac{(x')^2}{2(xx')^{3/2}(x+x')} - \frac{2x'(x'-x)}{(xx')^{1/2}(x+x')^3} \\ \partial_x \partial_x^2 \kappa(x, x') &= \frac{x^3 + 13x^2x' - 33x(x')^2 + 3(x')^3}{4x'(xx')^{1/2}(x+x')^4} \\ \partial_x^2 \partial_x^2 \kappa(x, x') &= -\frac{3x^4 + 60x^3x' - 270x^2(x')^2 + 60x(x')^3 + 3(x')^4}{8xx'(xx')^{1/2}(x+x')^5} \end{aligned}$$

(i)

$$\kappa(x, x') = 2 \left( \sqrt{\frac{x}{x'}} + \sqrt{\frac{x'}{x}} \right)^{-1} = \frac{2}{e^{-\frac{d_\kappa(x, x')}{2}} + e^{\frac{d_\kappa(x, x')}{2}}} = \frac{1}{\cosh\left(\frac{d_\kappa(x, x')}{2}\right)} \leq 2e^{-\frac{1}{2}d_\kappa(x, x')},$$

(ii) We have, assuming that  $x > x'$ ,

$$\begin{aligned}
\kappa^{(10)}(x, x') &= 2x\partial_x\kappa(x, x') = 2\frac{x' - x}{x + x'}\kappa(x, x') \\
&= 2\left(\frac{1}{\frac{x}{x'} + 1} - \frac{1}{1 + \frac{x'}{x}}\right)\kappa(x, x') \\
&= 2\left(\frac{1}{1 + \exp(d_\kappa(x, x'))} - \frac{1}{1 + \exp(-d_\kappa(x, x'))}\right) \\
&= 2\left(\frac{\exp(-d_\kappa(x, x')) - \exp(d_\kappa(x, x'))}{2 + \exp(d_\kappa(x, x')) + \exp(d_\kappa(x, x'))}\right) \\
&= \frac{-2\sinh(d_\kappa(x, x'))}{1 + \cosh(d_\kappa(x, x'))}\kappa(x, x') \\
&= -2\tanh(d_\kappa(x, x')/2)\kappa(x, x'),
\end{aligned}$$

(iii)

$$\begin{aligned}
\kappa^{(11)} &= 4xx'\partial_{x'}\partial_x\kappa(x, x') = 4xx'\frac{4xx' - (x - x')^2}{2\sqrt{xx'}(x + x')^3} \\
&= 4\kappa(x, x')^3 - \frac{4(x - x')^2}{(x + x')^2}\kappa(x, x') \\
&= \kappa(x, x') (4\kappa(x, x')^2 - 4\tanh^2(d_\kappa(x, x')/2))
\end{aligned}$$

so  $|\kappa^{(11)}| \leq 4|\kappa|^3 + 4|\kappa|$ .  
(iv)

$$\begin{aligned}
\kappa^{(20)} &= 4x^2\partial_x^2\kappa(x, x') = -\frac{4(xx')^{1/2}((x + x')^2 + 4x(x' - x))}{2(x + x')^3} \\
&= -2\kappa(x, x')\left(1 + \frac{2x(x' - x)}{(x + x')^2}\right)
\end{aligned}$$

so  $|\kappa^{(20)}| \leq 6|\kappa|$ . Also,

$$-\kappa^{(20)} \geq 2\kappa(x, x')(1 - 2\tanh(d_\kappa(x, x')/2))$$

(v)

$$\begin{aligned}
\kappa^{(12)} &= 2x(2x')^2\partial_x\partial_{x'}^2\kappa(x, x') \\
&= \kappa(x, x')\left(1 + \frac{2v(5u^2 - 18uv + v^2)}{(u + v)^3}\right)
\end{aligned}$$

so  $|\kappa^{(12)}| \leq 49|\kappa|$ .  
(vi)

$$\begin{aligned}
\kappa^{(22)} &= 16(xx')^2\partial_x^2\partial_{x'}^2\kappa(x, x') \\
&= -3 - \frac{48xx'(x^2 - 6xx' + (x')^2)}{(x + x')^4}
\end{aligned}$$

and  $\kappa^{(22)}(x, x) = 9$ . □

### F.3.4 Proof of Theorem F.4

Let  $d_\ell \stackrel{\text{def}}{=} d_\kappa(x_\ell + \alpha_\ell, x'_\ell + \alpha_\ell)$  and note that  $d_{\mathbf{H}}(x, x') = \sqrt{\sum_\ell d_\ell^2}$ . Define  $g = (2 \tanh(\frac{d_\ell}{2}))_{\ell=1}^d$ . We first prove that

- (i)  $|K(x, x')| \leq \prod_{\ell=1}^d \text{sech}(d_\ell/2) \leq \prod_{\ell=1}^d \frac{1}{1+d_\ell^2/8} \leq \frac{1}{1+\frac{1}{8}d_{\mathbf{H}}(x, x')^2}$ .
- (ii)  $\|K^{(10)}(x, x')\| \leq \|g\|_2 |K|$ .
- (iii)  $\|K^{(11)}\| \leq |K| \left( \|g\|_2^2 + 5 \right)$
- (iv)  $\|K^{(20)}\| \leq |K| \left( \|g\|_2^2 + 6 \right)$  and  $\lambda_{\min}(K^{(20)}) \geq K \left( 2 - 3 \|g\|_2^2 \right)$ .
- (v)  $\|K^{(12)}\| \leq |K| \left( \|g\|_2^3 + 16 \|g\|_2 + 49 \right)$
- (vi)  $\|K^{(22)}\| \leq 16d + 9$ .

The result would then follow because

- $\text{sech}(x) \leq 2e^{-x}$  and  $\text{sech}(x) \leq (1 + x^2/2)^{-1}$ .
- $|\tanh(x)| \leq \min\{x, 1\}$ , so  $\|g\| \leq \min\{d_{\mathbf{H}}(x, x'), 2\sqrt{d}\}$ ,

For example,  $\|K^{(12)}\| \leq \frac{1}{1+\frac{1}{8}d_{\mathbf{H}}(x, x')^2} (d_{\mathbf{H}}(x, x')^3 + 16d_{\mathbf{H}}(x, x') + 24) \leq 8d_{\mathbf{H}}(x, x') + \frac{\sqrt{8}}{2} + 24 \leq 34$  when  $d_{\mathbf{H}}(x, x') \leq 1$ .

In the following, we write  $\kappa_\ell^{(ij)} \stackrel{\text{def}}{=} \kappa^{(ij)}(x_\ell + \alpha_\ell, x'_\ell + \alpha_\ell)$  and  $\kappa_\ell \stackrel{\text{def}}{=} \kappa_\ell^{(00)}$  and  $K_i \stackrel{\text{def}}{=} \prod_{j \neq i} \kappa_j$ . Moreover, we will make use of the inequalities for  $\kappa^{(ij)}$  derived in Lemma F.6.

(i) We have

$$|K(x, x')| \leq \prod_{\ell=1}^d \text{sech}(d_\ell) \leq \prod_{\ell=1}^d \left( 1 + \frac{d_\ell^2}{2} \right)^{-1} \leq \frac{1}{1 + d_{\mathbf{H}}(x, x')^2}.$$

(ii)

$$K^{(10)}(x, x') = \left( \kappa_\ell^{(10)} K_\ell \right)_{\ell=1}^d \implies \|K^{(10)}(x, x')\| \leq \|g\|_2 |K|.$$

(iii) For  $i \neq j$

$$\left| K_{ij}^{(11)} \right| = \left| \kappa_i^{(10)} \kappa_j^{(01)} K_{ij} \right| \leq 4 \tanh\left(\frac{d_i}{2}\right) \tanh\left(\frac{d_j}{2}\right) |K|,$$

and  $\left| K_{ii}^{(11)} \right| = \left| \kappa_i^{(11)} K_i \right| \leq 5 |K|$ . So, given  $p \in \mathbb{R}^d$  of unit norm,

$$\begin{aligned} \langle K^{(11)} p, p \rangle &= \sum_{i=1}^d \sum_{j \neq i} \kappa_i^{(10)} \kappa_j^{(01)} K_{ij} p_i p_j + \sum_{i=1}^d p_i^2 \kappa_i^{(11)} K_i \\ &\leq |K| \left( \sum_{i=1}^d \sum_{j \neq i} 4 \tanh(d_i/2) \tanh(d_j/2) p_i p_j + 5 \sum_{i=1}^d p_i^2 \right) \\ &\leq |K| \left( \|g\|_2^2 + 5 \right) \end{aligned}$$



(iv) For  $i \neq j$ ,  $K_{ij}^{(20)} = \kappa_i^{(10)} \kappa_j^{(10)} K_{ij}$ , and  $|K_{ii}^{(20)}| = |\kappa_i^{(20)} K_i| \leq 6|K|$  and  $-K_{ii}^{(20)} \geq 2K(1 - 2 \tanh(\frac{d_i}{2}))$ .

$$\begin{aligned} \langle K^{(20)} p, p \rangle &= \sum_{i=1}^d \sum_{j \neq i} \kappa_i^{(10)} \kappa_j^{(10)} K_{ij} p_i p_j + \sum_{i=1}^d p_i^2 \kappa_i^{(20)} K_i \\ &\leq |K| \left( \sum_{i=1}^d \sum_{j \neq i} 4 \tanh(d_i/2) \tanh(d_j/2) p_i p_j + 6 \sum_{i=1}^d p_i^2 \right) \\ &\leq |K| \left( \|g\|_2^2 + 6 \right), \end{aligned}$$

and

$$\langle -K^{(20)} p, p \rangle \geq K \left( 2 - 2 \|g\|_\infty - \|g\|_2^2 \right)$$

(v) For  $i, j, \ell$  all distinct,

$$K_{ij\ell}^{(12)} = \kappa_i^{(10)} \kappa_j^{(01)} \kappa_\ell^{(01)} K_{ij\ell} \leq 8 \tanh\left(\frac{d_i}{2}\right) \tanh\left(\frac{d_j}{2}\right) \tanh\left(\frac{d_\ell}{2}\right) K,$$

for all  $i, \ell$ ,

$$K_{iil}^{(12)} = 8 \kappa_i^{(11)} \kappa_\ell^{(01)} K_{i\ell} \leq 10 \tanh\left(\frac{d_\ell}{2}\right) K$$

$$K_{iji}^{(12)} = \kappa_i^{(11)} \kappa_j^{(01)} K_{ij} \leq 10 \tanh\left(\frac{d_j}{2}\right) K,$$

$K_{ijj}^{(12)} = \kappa_i^{(10)} \kappa_\ell^{(02)} K_{ij} \leq 12 \tanh\left(\frac{d_i}{2}\right) K$ , and  $K_{iii}^{(12)} = \kappa_i^{(12)} K_i \leq 26K$ . So, for  $p, q \in \mathbb{R}^d$  of unit norm,

$$\begin{aligned} \sum_i \sum_j \sum_\ell K_{ij\ell}^{(12)} p_j p_\ell q_i &= \sum_i \left( \sum_{j \neq i} \sum_\ell K_{ij\ell}^{(12)} p_j p_\ell q_i + \sum_\ell K_{iil}^{(12)} p_i p_\ell q_i \right) \\ &= \sum_i \sum_{j \neq i} \left( \sum_{\ell \notin \{i, j\}} K_{ij\ell}^{(12)} p_j p_\ell q_i + K_{iji}^{(12)} p_j p_i q_i + K_{ijj}^{(12)} p_j^2 q_i \right) \\ &\quad + \sum_i \sum_{\ell \neq i} K_{iil}^{(12)} p_i p_\ell q_i + \sum_i K_{iii}^{(12)} p_i^2 q_i \\ &\leq |K| \left( \|g\|_2^3 + 16 \|g\|_2 + 49 \right). \end{aligned}$$

(vi)

$$\begin{aligned} \left\| K^{(22)}(x, x) \right\| &= \sup_{\|p\|=1} \mathbb{E}[\langle \mathbf{H}_x^{-1/2} \nabla^2 \varphi_\omega(x) \mathbf{H}_x^{-1/2} p, \mathbf{H}_x^{-1/2} \nabla^2 \varphi_\omega(x) \mathbf{H}_x^{-1/2} p \rangle] \\ &\leq \sup_{\|p\|=1} \sum_i \sum_{k \neq i} \kappa_i^{(11)} \kappa_k^{(11)} p_i^2 + \sum_i \sum_{k \neq i} \kappa_i^{(12)} \kappa_k^{(10)} p_i p_k + \sum_i \sum_{k \neq i} \sum_{j \notin \{i, k\}} \kappa_i^{(11)} \kappa_k^{(10)} \kappa_j^{(01)} p_k p_j \\ &\quad + \sum_i \sum_{j \neq i} \kappa_i^{(21)} \kappa_j^{(01)} p_j p_i + \sum_i \kappa_i^{(22)} p_i^2 \\ &= \sup_{\|p\|=1} \sum_i \sum_{k \neq i} \kappa_i^{(11)} \kappa_k^{(11)} p_i^2 + \sum_i \kappa_i^{(22)} p_i^2 \\ &\leq d \left\| \kappa^{(11)} \right\|_\infty + \left\| \kappa^{(22)} \right\|_\infty \leq 16d + \left\| \kappa^{(22)} \right\|_\infty. \end{aligned}$$

since  $\kappa^{(10)}(x, x) = \kappa^{(01)}(x, x) = 0$ , and  $\kappa^{(11)}(x, x) = 4$  from the proof of (iii) in Lemma F.6.

## G Tools

### G.1 Probability tools

**Lemma G.1** (Bernstein's inequality ([8], Thm. 6)). *Let  $x_1, \dots, x_n \in \mathbb{C}$  be i.i.d. bounded random variables such that  $\mathbb{E}x_i = 0$ ,  $|x_i| \leq M$  and  $\text{Var}(x_i) \stackrel{\text{def}}{=} \mathbb{E}[|x_i|^2] \leq \sigma^2$  for all  $i$ 's.*

*Then for all  $t > 0$  we have*

$$\mathcal{X} \left( \frac{1}{n} \sum_{i=1}^n x_i \geq t \right) \leq 4 \exp \left( -\frac{nt^2/4}{\sigma^2 + Mt/(3\sqrt{2})} \right). \quad (\text{G.1})$$

**Lemma G.2** (Matrix Bernstein ([10], Theorem 6.1.1)). *Let  $Y_1, \dots, Y_m \in \mathbb{C}^{d_1, d_2}$  be complex random matrices with*

$$\mathbb{E}Y_j = 0, \quad \|Y_j\| \leq L, \quad v(Y_j) := \max(\|\mathbb{E}Y_j Y_j^*\|, \|\mathbb{E}Y_j^* Y_j\|) \leq M$$

*for each index  $1 \leq j \leq m$ . Introduce the random matrix*

$$Z = \frac{1}{m} \sum_j Y_j.$$

*Then*

$$\mathbb{P}(\|Z\| \geq t) \leq 2(d_1 + d_2) e^{-\frac{mt^2/2}{M+Lt/3}} \quad (\text{G.2})$$

**Lemma G.3** (Vector Bernstein for complex vectors [7]). *Let  $Y_1, \dots, Y_M \in \mathbb{C}^d$  be a sequence of independent random vectors such that  $\mathbb{E}[Y_i] = 0$ ,  $\|Y_i\|_2 \leq K$  for  $i = 1, \dots, M$  and set*

$$\sigma^2 \stackrel{\text{def}}{=} \sum_{i=1}^M \mathbb{E} \|Y_i\|_2^2.$$

*Then, for all  $t \geq (K + \sqrt{K^2 + 36\sigma^2})/M$ ,*

$$\mathbb{P} \left( \left\| \frac{1}{M} \sum_{i=1}^M Y_i \right\|_2 \geq t \right) \leq 28 \exp \left( -\frac{Mt^2/2}{\sigma^2/M + tK/3} \right)$$

**Lemma G.4** (Hoeffding's inequality ([9], Lemma G.1)). *Let the components of  $u \in \mathbb{C}^k$  be drawn i.i.d. from a symmetric distribution on the complex unit circle or 0, consider a vector  $w \in \mathbb{C}^k$ . Then, with probability at least  $1 - \rho$ , we have*

$$\mathbb{P}(|\langle u, w \rangle| \geq t) \leq 4e^{-\frac{t^2}{4\|w\|^2}} \quad (\text{G.3})$$

**Lemma G.5.** [10, Theorem 4.1.1] *Let the components of  $u \in \mathbb{R}^k$  be a Rademacher sequence and let  $Y_1, \dots, Y_M \in \mathbb{C}^{d \times d}$  be self-adjoint matrices. Set  $\sigma^2 \stackrel{\text{def}}{=} \left\| \sum_{\ell=1}^M Y_\ell^2 \right\|$ . Then, for  $t > 0$ ,*

$$\mathbb{P} \left( \left\| \sum_{\ell=1}^M u_\ell Y_\ell \right\| \geq t \right) \leq 2d \exp \left( -\frac{t^2}{2\sigma^2} \right). \quad (\text{G.4})$$

We were only able to find a reference for this result in the case where  $u$  is a Rademacher sequence, however, by the contraction principle (see [6, Theorem 4.4]), a similar statement is true for Steinhaus sequences (we write only for the case of real symmetric matrices because this is all we require in this paper, but of course, the same argument extends to complex self-adjoint matrices):

**Corollary G.1.** Let the components of  $u \in \mathbb{C}^k$  i.i.d. from a symmetric distribution on the complex unit circle or 0 and let  $B_1, \dots, B_M \in \mathbb{R}^{d \times d}$  be symmetric matrices. Set  $\sigma^2 \stackrel{\text{def.}}{=} \left\| \sum_{\ell=1}^M B_\ell^2 \right\|$ . Then, for  $t > 0$ ,

$$\mathbb{P} \left( \left\| \sum_{\ell=1}^M u_\ell B_\ell \right\| \geq t \right) \leq 4d \exp \left( -\frac{t^2}{4\sigma^2} \right). \quad (\text{G.5})$$

*Proof.* By the union bound,

$$\mathbb{P} \left( \left\| \sum_{\ell=1}^M u_\ell B_\ell \right\| \geq t \right) \leq \mathbb{P} \left( \left\| \sum_{\ell=1}^M \text{Re}(u_\ell) B_\ell \right\| \geq \frac{t}{\sqrt{2}} \right) + \mathbb{P} \left( \left\| \sum_{\ell=1}^M \text{Im}(u_\ell) B_\ell \right\| \geq \frac{t}{\sqrt{2}} \right).$$

By the contraction principle [6, Theorem 4.4],

$$\mathbb{P} \left( \left\| \sum_{\ell=1}^M \text{Re}(u_\ell) B_\ell \right\| \geq \frac{t}{\sqrt{2}} \right) \leq \mathbb{P} \left( \left\| \sum_{\ell=1}^M \xi_\ell B_\ell \right\| \geq \frac{t}{\sqrt{2}} \right)$$

where  $\xi$  is a Rademacher sequence, and the same argument applies to the case of  $\text{Im}(u_\ell)$ . Therefore by Lemma G.5, we have  $\mathbb{P} \left( \left\| \sum_{\ell=1}^M u_\ell B_\ell \right\| \geq t \right) \leq 4d \exp \left( -\frac{t^2}{4\sigma^2} \right)$ .  $\square$

## G.2 Linear algebra tools

The following simple lemma will be handy.

**Lemma G.6.** For  $1 \leq i, j \leq s$ , take any scalars  $a_{ij} \in \mathbb{R}$ , vectors  $Q_{ij}, R_{ij} \in \mathbb{R}^d$  and square matrices  $A_{ij} \in \mathbb{R}^{d \times d}$ .

1. Let  $M \in \mathbb{R}^{sd \times sd}$  be a matrix formed by blocks :

$$M = \begin{pmatrix} A_{11} & \dots & A_{1s} \\ \vdots & \ddots & \vdots \\ A_{s1} & \dots & A_{ss} \end{pmatrix}$$

Then we have

$$\|M\|_{\text{block}} = \sup_{\|x\|_{\text{block}}=1} \|Mx\|_{\text{block}} \leq \max_{1 \leq i \leq s} \sum_{j=1}^s \|A_{ij}\| \quad (\text{G.6})$$

Now, let  $P \in \mathbb{R}^{sd \times s}$  be a rectangular matrix formed by stacking vectors  $Q_{ij} \in \mathbb{R}^d$ :

$$P = \begin{pmatrix} Q_{11} & \dots & Q_{1s} \\ \vdots & \ddots & \vdots \\ Q_{s1} & \dots & Q_{ss} \end{pmatrix}$$

Then,

$$\|M\|_{\infty \rightarrow \text{block}} \leq \max_{1 \leq i \leq s} \sum_{j=1}^s \|Q_{ij}\|_2, \quad \|M^\top\|_{\text{block} \rightarrow \infty} \leq \max_{1 \leq i \leq s} \sum_{j=1}^s \|Q_{ji}\|_2 \quad (\text{G.7})$$

2. Consider  $A \in \mathbb{R}^{s(d+1) \times s(d+1)}$  decomposed as

$$M = \begin{pmatrix} a_{11} & \dots & a_{1s} & Q_{11}^\top & \dots & Q_{1s}^\top \\ \vdots & \ddots & \vdots & \vdots & \ddots & \vdots \\ a_{s1} & \dots & a_{ss} & Q_{s1}^\top & \dots & Q_{ss}^\top \\ R_{11} & \dots & R_{1s} & A_{11} & \dots & A_{1s} \\ \vdots & \ddots & \vdots & \vdots & \ddots & \vdots \\ R_{s1} & \dots & R_{ss} & A_{s1} & \dots & A_{ss} \end{pmatrix}$$

Then,

$$\begin{aligned}\|M\| &\leq \sqrt{\sum_{i,j} a_{ij}^2 + \|Q_{ij}\|^2 + \|R_{ij}\|^2 + \|A_{ij}\|^2}, \\ \|M\|_{\text{Block}} &\leq \max_i \left\{ \sum_j |a_{ij}| + \|Q_{ij}\|, \sum_j \|R_{ij}\| + \|A_{ij}\| \right\}\end{aligned}$$

*Proof.* The proof is simple linear algebra.

1. Let  $x$  be a vector with  $\|x\|_{\text{block}} \leq 1$  decomposed into blocks  $x = [x_1, \dots, x_s]$  with  $x_i \in \mathbb{R}^d$ , we have

$$\|Mx\|_{\text{block}}^2 = \max_{1 \leq i \leq s} \left\| \sum_{j=1}^s A_{ij} x_j \right\|^2 \leq \max_i \sum_j \|A_{ij}\| \|x_j\| \leq \max_i \sum_j \|A_{ij}\|$$

2. Similarly,

$$\|M^\top x\|_\infty = \max_{1 \leq i \leq s} \left\| \sum_{j=1}^s Q_{ji}^\top x_j \right\| \leq \max_i \sum_j \|Q_{ji}\| \|x_j\| \leq \max_i \sum_j \|Q_{ji}\|$$

Then, taking  $x \in \mathbb{R}^s$  such that  $\|x\|_\infty \leq 1$ , we have

$$\|Mx\|_{\text{block}} = \max_{1 \leq i \leq s} \left\| \sum_{j=1}^s x_j Q_{ij} \right\| \leq \max_i \sum_j \|Q_{ij}\|$$

3. Taking  $x = [x_1, \dots, x_s, X_1, \dots, X_s] \in \mathbb{R}^{s(d+1)}$  with  $\|x\| = 1$ , we have

$$\begin{aligned}\|Mx\|^2 &= \sum_{i=1}^s \left( \sum_{j=1}^s a_{ij} x_j + Q_{ij}^\top X_j \right)^2 + \left\| \sum_{j=1}^s R_{ij} x_j + A_{ij} X_j \right\|^2 \\ &\leq \sum_{i=1}^s \left( \|x\| \sqrt{\sum_{j=1}^s a_{ij}^2 + \|Q_{ij}\|^2} \right)^2 + \left( \|x\| \sqrt{\sum_{j=1}^s \|R_{ij}\|^2 + \|A_{ij}\|^2} \right)^2 \\ &\leq \sum_{i,j} a_{ij}^2 + \|Q_{ij}\|^2 + \|R_{ij}\|^2 + \|A_{ij}\|^2\end{aligned}$$

Now, if  $\|x\|_{\text{Block}} = 1$ , we have

$$\begin{aligned}\|Mx\|_{\text{Block}} &= \max_i \left( \left| \sum_{j=1}^s a_{ij} x_j + Q_{ij}^\top X_j \right|, \left\| \sum_{j=1}^s R_{ij} x_j + A_{ij} X_j \right\| \right) \\ &\leq \max_i \left( \sum_{j=1}^s |a_{ij}| + \|Q_{ij}\|, \sum_{j=1}^s \|R_{ij} x_j + A_{ij} X_j\| \right)\end{aligned}$$

□

## References

- [1] Mohamed Akkouchi. On the convolution of exponential distributions. *Journal of the Chungcheong Mathematical Society*, 21(4):501–510, 2008.
- [2] Emmanuel J. Candès and Carlos Fernandez-Granda. Towards a mathematical theory of super-resolution. *Communications on Pure and Applied Mathematics*, 67(6):906–956, 2014.
- [3] Sanjoy Dasgupta and Anupam Gupta. An Elementary Proof of a Theorem of Johnson and Lindenstrauss. *Random Structures and Algorithms*, 22(1):60–65, 2003.
- [4] Quentin Denoyelle, Vincent Duval, and Gabriel Peyré. Support recovery for sparse super-resolution of positive measures. *Journal of Fourier Analysis and Applications*, 23(5):1153–1194, 2017.
- [5] Rémi Gribonval, Gilles Blanchard, Nicolas Keriven, and Yann Traonmilin. Compressive statistical learning with random feature moments. *arXiv preprint arXiv:1706.07180*, 2017.
- [6] Michel Ledoux and Michel Talagrand. *Probability in Banach Spaces: isoperimetry and processes*. Springer Science & Business Media, 2013.
- [7] Stanislav Minsker. On some extensions of bernsteins inequality for self-adjoint operators. *Statistics & Probability Letters*, 127:111–119, 2017.
- [8] Karthik Sridharan. A Gentle Introduction to Concentration Inequalities. Technical report, 2002.
- [9] Gongguo Tang, Badri Narayan Bhaskar, Parikshit Shah, and Benjamin Recht. Compressed sensing off the grid. *IEEE transactions on information theory*, 59(11):7465–7490, 2013.
- [10] Joel A Tropp. An introduction to matrix concentration inequalities. *Foundations and Trends in Machine Learning*, 8(1-2):1–230, 2015.
